# Supplementary material for: Exploratory metabolomic analysis for characterizing the metabolic profile of the urinary bladder under estrogen deprivation
Source: Front Endocrinol (Lausanne). 2024 May 31;15:1384115. doi: 10.3389/fendo.2024.1384115 (PMC11176512; doi:10.3389/fendo.2024.1384115)
Supplement: Supplementary file 15 [file Table_1.xlsx]

## Sheet: Correlation
	Acetylcholine	Dihydrouracil	(S)-Homostachydrin	2-Ethylhydracrylic	2-Hydroxy-2-methyl	5-Hydroxyhexanoic	Uridine	Isoleucyl-Alanine	Glycocholic acid	L-Kynurenine	LysoPC(15:0)	N-Acetylaspartylgl	Phosphocreatine	Symmetric dimethyl	Phenylalanyl-Serin	Proline betaine	N-Acetylglutamic a	cis-Aconitic acid	Citric acid	Tartaric acid	N-Acetyl-L-methion	4-Pyridoxic acid	thymine	Thymidine	1-Methylguanosine	5-Hydroxy-L-trypto	O-Adipoylcarnitine	Hippuric acid	Urocanic acid	Gluconic acid	4-Guanidinobutanoi	Cortisol	N6-Acetyl-L-lysine	Phenol sulphate	Phenylacetylglycin	p-Cresol sulfate	Indoxyl sulfate	1-Methyladenosine	Allantoin	Creatinine	1-Methylguanine	N-a-Acetyl-L-argin	2-Hydroxyglutarate	Tryptophyl-Leucine	Indolelactic acid	L-gamma-glutamyl-L	6-Phosphonoglucono	L-Acetylcarnitine	3-Hydroxyisovalery
Acetylcholine	1	0.62121	0.54259	0.39639	0.45678	0.58416	0.72782	0.4926	-0.078192	-0.18016	-0.31743	-0.14793	-0.071046	0.22973	0.31505	0.33644	0.084426	0.026111	0.016669	-0.048397	0.068383	0.41274	0.2694	0.44407	0.54741	0.29688	0.38772	0.18572	0.3352	0.074141	0.2457	0.019865	0.082917	0.36346	0.28436	0.22935	0.50763	0.46689	0.40635	0.43944	0.41564	0.33133	0.24619	-0.082897	0.4258	0.092017	0.39717	-0.29042	-0.04222
Dihydrouracil	0.62121	1	0.74776	0.37152	0.46827	0.45324	0.7439	0.42755	0.18149	0.061507	-0.16109	-0.1071	-0.26117	0.43266	0.41004	0.30475	5.5644e-05	0.013951	-0.010314	0.0078671	0.086201	-0.020618	-0.095699	0.28368	0.31494	0.11076	0.42369	-0.099431	0.12391	-0.056002	0.20915	0.016217	-0.008516	0.23795	0.21102	0.083962	0.22689	0.18605	0.12793	0.10399	0.10289	0.24277	0.029108	-0.27615	-0.06421	-0.15587	-0.028361	-0.10912	-0.10676
(S)-Homostachydrin	0.54259	0.74776	1	0.37346	0.36395	0.34122	0.57903	0.32483	0.094408	0.14696	-0.19132	-0.16766	-0.28969	0.31281	0.45635	0.56554	0.19511	0.22604	0.2211	0.036834	0.10776	-0.055143	-0.1178	0.14714	0.24151	0.17927	0.2253	-0.018196	0.087752	0.022818	0.21074	0.13806	0.084457	0.25358	0.30448	0.15447	0.33343	0.15051	0.10943	0.11752	0.12001	0.36132	0.31597	-0.068284	0.13582	0.061413	-0.10363	-0.35766	-0.13817
2-Ethylhydracrylic	0.39639	0.37152	0.37346	1	0.91219	0.68583	0.65269	0.55046	0.1255	-0.0094636	-0.24928	-0.27807	-0.34397	0.50491	0.66695	0.54243	0.46606	0.42881	0.41193	0.14388	0.17612	0.4516	0.36137	0.56005	0.44096	0.56177	0.49408	0.22759	0.40869	0.37726	0.097456	0.26822	0.19187	0.36098	0.59591	0.52183	0.40861	0.5022	0.46433	0.52728	0.51932	0.011165	0.2243	0.19895	0.33695	0.29377	-0.28663	-0.13919	0.03064
2-Hydroxy-2-methyl	0.45678	0.46827	0.36395	0.91219	1	0.7682	0.78886	0.71786	0.20434	-0.0005231	-0.053549	-0.12729	-0.20163	0.61221	0.79499	0.60107	0.55582	0.55858	0.52134	0.31498	0.29227	0.52072	0.4407	0.7056	0.60272	0.66351	0.70496	0.36029	0.57315	0.49845	0.32429	0.44149	0.37471	0.39986	0.65931	0.59184	0.51548	0.65257	0.5846	0.64821	0.64862	0.1377	0.23237	0.18618	0.41988	0.39194	-0.26512	-0.23185	-0.12622
5-Hydroxyhexanoic	0.58416	0.45324	0.34122	0.68583	0.7682	1	0.77022	0.67551	0.077418	-0.13963	0.061321	-0.036863	-0.15681	0.52105	0.64937	0.60471	0.45715	0.3573	0.37366	0.31706	0.32568	0.5046	0.3605	0.52241	0.51761	0.43854	0.55472	0.30821	0.6022	0.45186	0.32854	0.34797	0.34179	0.5675	0.56185	0.61145	0.57631	0.57705	0.56642	0.63362	0.57647	0.29116	0.36644	0.076779	0.46625	0.28824	0.04272	-0.35196	0.0041215
Uridine	0.72782	0.7439	0.57903	0.65269	0.78886	0.77022	1	0.77912	0.33174	0.16531	0.017373	0.084327	0.0022098	0.55014	0.69743	0.62539	0.51365	0.47695	0.43723	0.40007	0.41366	0.56737	0.50315	0.65615	0.69358	0.64771	0.78709	0.42004	0.65781	0.50735	0.52407	0.42752	0.40632	0.5976	0.66778	0.55833	0.69907	0.67612	0.67602	0.67078	0.68662	0.36695	0.20826	0.074208	0.45204	0.22538	-0.10167	-0.40384	-0.21238
Isoleucyl-Alanine	0.4926	0.42755	0.32483	0.55046	0.71786	0.67551	0.77912	1	0.10171	-0.046914	0.021162	0.19084	0.2427	0.38965	0.57732	0.53136	0.53189	0.57533	0.55674	0.34392	0.38463	0.62836	0.50747	0.65406	0.67823	0.69901	0.7506	0.47791	0.70299	0.60844	0.57947	0.4555	0.48811	0.61795	0.71454	0.66595	0.72497	0.84816	0.72502	0.77528	0.77668	0.43628	0.384	0.26611	0.61689	0.59088	-0.16371	-0.3758	-0.26823
Glycocholic acid	-0.078192	0.18149	0.094408	0.1255	0.20434	0.077418	0.33174	0.10171	1	0.36139	0.57595	0.42393	0.18301	0.39296	0.41099	0.33643	0.56206	0.42103	0.34571	0.66311	0.31652	0.17441	0.26748	0.15494	0.21828	0.39731	0.37845	0.46791	0.46708	0.44408	0.56281	0.63105	0.44727	0.40977	0.42636	0.27629	0.34904	0.21556	0.35083	0.24452	0.32985	0.084222	-0.12054	-0.017728	0.0089834	-0.090913	-0.24777	-0.10324	-0.028156
L-Kynurenine	-0.18016	0.061507	0.14696	-0.0094636	-0.0005231	-0.13963	0.16531	-0.046914	0.36139	1	0.23726	0.31033	0.25039	0.26429	0.17959	0.33966	0.36398	0.36383	0.31084	0.36837	0.59878	0.14651	0.40683	0.095211	0.2032	0.28124	0.32555	0.22233	0.26657	0.43787	0.205	0.36578	0.34598	0.12068	0.17443	0.07761	0.17559	0.088028	0.21297	0.12427	0.18124	0.13921	-0.15709	0.28477	0.057329	-0.0021534	-0.58532	-0.52493	-0.55753
LysoPC(15:0)	-0.31743	-0.16109	-0.19132	-0.24928	-0.053549	0.061321	0.017373	0.021162	0.57595	0.23726	1	0.40081	0.31941	0.26829	0.2466	0.24749	0.43705	0.41885	0.42873	0.72453	0.36527	0.094009	0.22204	0.011797	0.16046	0.1693	0.1996	0.45742	0.46262	0.4937	0.62462	0.67357	0.62203	0.32337	0.17343	0.23473	0.2211	0.13125	0.20728	0.17725	0.19337	0.26232	0.11411	-0.029683	0.056308	0.21577	-0.18696	-0.1636	-0.20914
N-Acetylaspartylgl	-0.14793	-0.1071	-0.16766	-0.27807	-0.12729	-0.036863	0.084327	0.19084	0.42393	0.31033	0.40081	1	0.74422	-0.081717	0.036704	0.058156	0.19313	0.1496	0.098636	0.28896	0.25969	0.26929	0.26364	-0.043509	0.21118	0.25227	0.23797	0.34251	0.32921	0.36203	0.28624	0.35578	0.29753	0.23657	0.20116	0.28987	0.23146	0.31714	0.42773	0.30611	0.34688	0.00041577	-0.32816	0.51025	0.30003	0.12305	-0.024777	-0.23535	-0.23775
Phosphocreatine	-0.071046	-0.26117	-0.28969	-0.34397	-0.20163	-0.15681	0.0022098	0.2427	0.18301	0.25039	0.31941	0.74422	1	-0.15962	-0.15215	0.0049277	0.16315	0.19415	0.14801	0.21411	0.2359	0.45843	0.48845	0.20828	0.4515	0.32628	0.27967	0.45873	0.45518	0.39654	0.38311	0.34792	0.45586	0.38491	0.26769	0.33982	0.41269	0.47793	0.536	0.45995	0.47721	0.12329	-0.088399	0.52443	0.44165	0.2357	0.048595	-0.21319	-0.49256
Symmetric dimethyl	0.22973	0.43266	0.31281	0.50491	0.61221	0.52105	0.55014	0.38965	0.39296	0.26429	0.26829	-0.081717	-0.15962	1	0.69767	0.7517	0.54768	0.51571	0.50657	0.57673	0.59464	0.20685	0.33694	0.46278	0.48567	0.4331	0.6619	0.33635	0.48932	0.50588	0.42193	0.48264	0.57136	0.40189	0.45226	0.44003	0.37777	0.42617	0.35206	0.44458	0.42709	0.40494	0.41954	0.031639	0.035495	0.33626	-0.42847	-0.26983	-0.20177
Phenylalanyl-Serin	0.31505	0.41004	0.45635	0.66695	0.79499	0.64937	0.69743	0.57732	0.41099	0.17959	0.2466	0.036704	-0.15215	0.69767	1	0.75451	0.76191	0.72694	0.70709	0.62247	0.60452	0.47604	0.40752	0.59884	0.52429	0.69924	0.71725	0.5498	0.58817	0.65391	0.49978	0.63728	0.65885	0.41494	0.69044	0.62832	0.63701	0.59734	0.58868	0.62868	0.62832	0.48364	0.39106	0.24274	0.388	0.49181	-0.3949	-0.25587	-0.037836
Proline betaine	0.33644	0.30475	0.56554	0.54243	0.60107	0.60471	0.62539	0.53136	0.33643	0.33966	0.24749	0.058156	0.0049277	0.7517	0.75451	1	0.76122	0.72557	0.71673	0.59114	0.61729	0.41298	0.46345	0.43074	0.57088	0.61714	0.59152	0.52838	0.63698	0.68439	0.58251	0.65997	0.68968	0.63085	0.69044	0.61249	0.67734	0.58247	0.56997	0.6345	0.6429	0.53797	0.56928	0.29934	0.45547	0.53025	-0.39692	-0.61482	-0.2725
N-Acetylglutamic a	0.084426	5.5644e-05	0.19511	0.46606	0.55582	0.45715	0.51365	0.53189	0.56206	0.36398	0.43705	0.19313	0.16315	0.54768	0.76191	0.76122	1	0.93421	0.91575	0.84348	0.71787	0.59751	0.65019	0.57329	0.49577	0.79275	0.65533	0.74556	0.81194	0.8999	0.65136	0.84886	0.82264	0.61493	0.797	0.68079	0.76379	0.65343	0.7122	0.73788	0.75518	0.44416	0.49459	0.32943	0.52079	0.53913	-0.46723	-0.45523	-0.17876
cis-Aconitic acid	0.026111	0.013951	0.22604	0.42881	0.55858	0.3573	0.47695	0.57533	0.42103	0.36383	0.41885	0.1496	0.19415	0.51571	0.72694	0.72557	0.93421	1	0.98019	0.78093	0.66425	0.54374	0.59836	0.59809	0.50423	0.76614	0.66864	0.67869	0.74954	0.86933	0.61939	0.81969	0.81114	0.53514	0.76708	0.66558	0.69683	0.64203	0.67214	0.70179	0.71721	0.40862	0.48325	0.34317	0.464	0.6029	-0.5244	-0.42205	-0.29253
Citric acid	0.016669	-0.010314	0.2211	0.41193	0.52134	0.37366	0.43723	0.55674	0.34571	0.31084	0.42873	0.098636	0.14801	0.50657	0.70709	0.71673	0.91575	0.98019	1	0.78552	0.69414	0.50284	0.56509	0.58602	0.44843	0.70858	0.61371	0.66154	0.7262	0.86503	0.58422	0.80177	0.80727	0.53839	0.72807	0.6412	0.67283	0.61055	0.62326	0.67786	0.67263	0.44982	0.58902	0.31342	0.46594	0.6631	-0.54387	-0.39518	-0.23248
Tartaric acid	-0.048397	0.0078671	0.036834	0.14388	0.31498	0.31706	0.40007	0.34392	0.66311	0.36837	0.72453	0.28896	0.21411	0.57673	0.62247	0.59114	0.84348	0.78093	0.78552	1	0.75589	0.4261	0.59241	0.45187	0.40903	0.62903	0.64364	0.72952	0.71225	0.81813	0.68478	0.79024	0.80758	0.48133	0.58247	0.5763	0.59887	0.45908	0.54617	0.56058	0.57955	0.4964	0.41406	0.11968	0.27571	0.41177	-0.36025	-0.30405	-0.16351
N-Acetyl-L-methion	0.068383	0.086201	0.10776	0.17612	0.29227	0.32568	0.41366	0.38463	0.31652	0.59878	0.36527	0.25969	0.2359	0.59464	0.60452	0.61729	0.71787	0.66425	0.69414	0.75589	1	0.4833	0.63888	0.50494	0.4339	0.58478	0.69595	0.62031	0.60812	0.8093	0.49594	0.59277	0.75493	0.39522	0.48107	0.48408	0.59433	0.50807	0.54748	0.56896	0.56151	0.66277	0.46082	0.29683	0.35066	0.50765	-0.5264	-0.44997	-0.28415
4-Pyridoxic acid	0.41274	-0.020618	-0.055143	0.4516	0.52072	0.5046	0.56737	0.62836	0.17441	0.14651	0.094009	0.26929	0.45843	0.20685	0.47604	0.41298	0.59751	0.54374	0.50284	0.4261	0.4833	1	0.88407	0.72174	0.79136	0.81793	0.68592	0.80162	0.75684	0.75118	0.44813	0.47646	0.60563	0.55925	0.72209	0.75267	0.81634	0.85138	0.92289	0.89133	0.90158	0.36078	0.18505	0.51458	0.76147	0.48564	0.030472	-0.23467	-0.14477
thymine	0.2694	-0.095699	-0.1178	0.36137	0.4407	0.3605	0.50315	0.50747	0.26748	0.40683	0.22204	0.26364	0.48845	0.33694	0.40752	0.46345	0.65019	0.59836	0.56509	0.59241	0.63888	0.88407	1	0.69108	0.76914	0.82625	0.73211	0.79786	0.7823	0.81898	0.49301	0.55761	0.66771	0.51301	0.66039	0.68037	0.73522	0.76486	0.81855	0.83153	0.86422	0.35646	0.21848	0.49666	0.66918	0.48764	-0.17514	-0.37989	-0.36837
Thymidine	0.44407	0.28368	0.14714	0.56005	0.7056	0.52241	0.65615	0.65406	0.15494	0.095211	0.011797	-0.043509	0.20828	0.46278	0.59884	0.43074	0.57329	0.59809	0.58602	0.45187	0.50494	0.72174	0.69108	1	0.78237	0.72393	0.79517	0.65461	0.70472	0.62145	0.3929	0.48669	0.58585	0.46119	0.67804	0.62291	0.71203	0.77587	0.7537	0.7842	0.75314	0.33705	0.36034	0.21694	0.57228	0.45368	-0.14363	-0.16399	-0.2345
1-Methylguanosine	0.54741	0.31494	0.24151	0.44096	0.60272	0.51761	0.69358	0.67823	0.21828	0.2032	0.16046	0.21118	0.4515	0.48567	0.52429	0.57088	0.49577	0.50423	0.44843	0.40903	0.4339	0.79136	0.76914	0.78237	1	0.7553	0.77818	0.72375	0.77573	0.64248	0.56984	0.55182	0.6667	0.59277	0.71256	0.7191	0.79327	0.88205	0.82701	0.85146	0.85637	0.45083	0.24417	0.42632	0.69288	0.50184	0.0055775	-0.34826	-0.44814
5-Hydroxy-L-trypto	0.29688	0.11076	0.17927	0.56177	0.66351	0.43854	0.64771	0.69901	0.39731	0.28124	0.1693	0.25227	0.32628	0.4331	0.69924	0.61714	0.79275	0.76614	0.70858	0.62903	0.58478	0.81793	0.82625	0.72393	0.7553	1	0.83147	0.7821	0.75926	0.80255	0.60235	0.6108	0.70464	0.4936	0.79614	0.7429	0.80769	0.81869	0.86767	0.86797	0.90792	0.43369	0.31495	0.46335	0.63952	0.59451	-0.27844	-0.35594	-0.31589
O-Adipoylcarnitine	0.38772	0.42369	0.2253	0.49408	0.70496	0.55472	0.78709	0.7506	0.37845	0.32555	0.1996	0.23797	0.27967	0.6619	0.71725	0.59152	0.65533	0.66864	0.61371	0.64364	0.69595	0.68592	0.73211	0.79517	0.77818	0.83147	1	0.63292	0.73299	0.73216	0.59154	0.53733	0.66625	0.46215	0.68418	0.69735	0.72191	0.76978	0.78372	0.78535	0.80231	0.49	0.26776	0.24799	0.41303	0.42843	-0.26231	-0.33555	-0.39768
Hippuric acid	0.18572	-0.099431	-0.018196	0.22759	0.36029	0.30821	0.42004	0.47791	0.46791	0.22233	0.45742	0.34251	0.45873	0.33635	0.5498	0.52838	0.74556	0.67869	0.66154	0.72952	0.62031	0.80162	0.79786	0.65461	0.72375	0.7821	0.63292	1	0.7653	0.84438	0.67888	0.74669	0.80789	0.55672	0.72105	0.69735	0.80395	0.76314	0.79584	0.77567	0.82035	0.55684	0.33092	0.41371	0.71175	0.61547	-0.10896	-0.23196	-0.088047
Urocanic acid	0.3352	0.12391	0.087752	0.40869	0.57315	0.6022	0.65781	0.70299	0.46708	0.26657	0.46262	0.32921	0.45518	0.48932	0.58817	0.63698	0.81194	0.74954	0.7262	0.71225	0.60812	0.75684	0.7823	0.70472	0.77573	0.75926	0.73299	0.7653	1	0.874	0.73443	0.83756	0.8282	0.81563	0.80988	0.73898	0.86207	0.85829	0.86064	0.89609	0.88912	0.40047	0.37754	0.35954	0.69315	0.50877	-0.21947	-0.49757	-0.38155
Gluconic acid	0.074141	-0.056002	0.022818	0.37726	0.49845	0.45186	0.50735	0.60844	0.44408	0.43787	0.4937	0.36203	0.39654	0.50588	0.65391	0.68439	0.8999	0.86933	0.86503	0.81813	0.8093	0.75118	0.81898	0.62145	0.64248	0.80255	0.73216	0.84438	0.874	1	0.65978	0.84193	0.8691	0.64742	0.78499	0.76188	0.78361	0.77934	0.8064	0.82503	0.8446	0.49986	0.40456	0.48784	0.63494	0.65737	-0.44524	-0.4456	-0.27558
4-Guanidinobutanoi	0.2457	0.20915	0.21074	0.097456	0.32429	0.32854	0.52407	0.57947	0.56281	0.205	0.62462	0.28624	0.38311	0.42193	0.49978	0.58251	0.65136	0.61939	0.58422	0.68478	0.49594	0.44813	0.49301	0.3929	0.56984	0.60235	0.59154	0.67888	0.73443	0.65978	1	0.74895	0.7702	0.64852	0.53693	0.4044	0.70461	0.59381	0.57345	0.55673	0.62273	0.63473	0.39235	-0.00033924	0.43791	0.46224	-0.19663	-0.47035	-0.38009
Cortisol	0.019865	0.016217	0.13806	0.26822	0.44149	0.34797	0.42752	0.4555	0.63105	0.36578	0.67357	0.35578	0.34792	0.48264	0.63728	0.65997	0.84886	0.81969	0.80177	0.79024	0.59277	0.47646	0.55761	0.48669	0.55182	0.6108	0.53733	0.74669	0.83756	0.84193	0.74895	1	0.86183	0.65901	0.72863	0.59316	0.67956	0.64317	0.61629	0.64777	0.68362	0.38049	0.32894	0.3612	0.55159	0.52084	-0.42823	-0.41577	-0.29659
N6-Acetyl-L-lysine	0.082917	-0.008516	0.084457	0.19187	0.37471	0.34179	0.40632	0.48811	0.44727	0.34598	0.62203	0.29753	0.45586	0.57136	0.65885	0.68968	0.82264	0.81114	0.80727	0.80758	0.75493	0.60563	0.66771	0.58585	0.6667	0.70464	0.66625	0.80789	0.8282	0.8691	0.7702	0.86183	1	0.64516	0.68616	0.64381	0.77545	0.71604	0.71758	0.75512	0.74778	0.6295	0.52324	0.39128	0.53134	0.64875	-0.39357	-0.37101	-0.37393
Phenol sulphate	0.36346	0.23795	0.25358	0.36098	0.39986	0.5675	0.5976	0.61795	0.40977	0.12068	0.32337	0.23657	0.38491	0.40189	0.41494	0.63085	0.61493	0.53514	0.53839	0.48133	0.39522	0.55925	0.51301	0.46119	0.59277	0.4936	0.46215	0.55672	0.81563	0.64742	0.64852	0.65901	0.64516	1	0.76567	0.63117	0.79368	0.69541	0.69263	0.71606	0.70644	0.34442	0.39867	0.27023	0.55739	0.33886	-0.1949	-0.39229	-0.16932
Phenylacetylglycin	0.28436	0.21102	0.30448	0.59591	0.65931	0.56185	0.66778	0.71454	0.42636	0.17443	0.17343	0.20116	0.26769	0.45226	0.69044	0.69044	0.797	0.76708	0.72807	0.58247	0.48107	0.72209	0.66039	0.67804	0.71256	0.79614	0.68418	0.72105	0.80988	0.78499	0.53693	0.72863	0.68616	0.76567	1	0.86996	0.8631	0.82689	0.81144	0.8534	0.87766	0.3609	0.33717	0.52656	0.65688	0.48135	-0.28527	-0.25398	-0.10791
p-Cresol sulfate	0.22935	0.083962	0.15447	0.52183	0.59184	0.61145	0.55833	0.66595	0.27629	0.07761	0.23473	0.28987	0.33982	0.44003	0.62832	0.61249	0.68079	0.66558	0.6412	0.5763	0.48408	0.75267	0.68037	0.62291	0.7191	0.7429	0.69735	0.69735	0.73898	0.76188	0.4044	0.59316	0.64381	0.63117	0.86996	1	0.7876	0.79789	0.80807	0.85921	0.8426	0.36391	0.34009	0.57435	0.6145	0.51503	-0.082827	-0.19991	-0.10649
Indoxyl sulfate	0.50763	0.22689	0.33343	0.40861	0.51548	0.57631	0.69907	0.72497	0.34904	0.17559	0.2211	0.23146	0.41269	0.37777	0.63701	0.67734	0.76379	0.69683	0.67283	0.59887	0.59433	0.81634	0.73522	0.71203	0.79327	0.80769	0.72191	0.80395	0.86207	0.78361	0.70461	0.67956	0.77545	0.79368	0.8631	0.7876	1	0.8627	0.88526	0.89702	0.89856	0.62724	0.49506	0.38123	0.75562	0.51571	-0.076898	-0.4259	-0.22958
1-Methyladenosine	0.46689	0.18605	0.15051	0.5022	0.65257	0.57705	0.67612	0.84816	0.21556	0.088028	0.13125	0.31714	0.47793	0.42617	0.59734	0.58247	0.65343	0.64203	0.61055	0.45908	0.50807	0.85138	0.76486	0.77587	0.88205	0.81869	0.76978	0.76314	0.85829	0.77934	0.59381	0.64317	0.71604	0.69541	0.82689	0.79789	0.8627	1	0.89821	0.95072	0.95002	0.45493	0.36117	0.55291	0.81518	0.68117	-0.13335	-0.34751	-0.28888
Allantoin	0.40635	0.12793	0.10943	0.46433	0.5846	0.56642	0.67602	0.72502	0.35083	0.21297	0.20728	0.42773	0.536	0.35206	0.58868	0.56997	0.7122	0.67214	0.62326	0.54617	0.54748	0.92289	0.81855	0.7537	0.82701	0.86767	0.78372	0.79584	0.86064	0.8064	0.57345	0.61629	0.71758	0.69263	0.81144	0.80807	0.88526	0.89821	1	0.95216	0.94949	0.36445	0.23726	0.50982	0.73005	0.48912	-0.074442	-0.36146	-0.2753
Creatinine	0.43944	0.10399	0.11752	0.52728	0.64821	0.63362	0.67078	0.77528	0.24452	0.12427	0.17725	0.30611	0.45995	0.44458	0.62868	0.6345	0.73788	0.70179	0.67786	0.56058	0.56896	0.89133	0.83153	0.7842	0.85146	0.86797	0.78535	0.77567	0.89609	0.82503	0.55673	0.64777	0.75512	0.71606	0.8534	0.85921	0.89702	0.95072	0.95216	1	0.97883	0.41758	0.40501	0.55765	0.78209	0.62277	-0.11883	-0.37798	-0.28308
1-Methylguanine	0.41564	0.10289	0.12001	0.51932	0.64862	0.57647	0.68662	0.77668	0.32985	0.18124	0.19337	0.34688	0.47721	0.42709	0.62832	0.6429	0.75518	0.71721	0.67263	0.57955	0.56151	0.90158	0.86422	0.75314	0.85637	0.90792	0.80231	0.82035	0.88912	0.8446	0.62273	0.68362	0.74778	0.70644	0.87766	0.8426	0.89856	0.95002	0.94949	0.97883	1	0.41766	0.32418	0.56799	0.78989	0.60875	-0.14935	-0.39179	-0.28657
N-a-Acetyl-L-argin	0.33133	0.24277	0.36132	0.011165	0.1377	0.29116	0.36695	0.43628	0.084222	0.13921	0.26232	0.00041577	0.12329	0.40494	0.48364	0.53797	0.44416	0.40862	0.44982	0.4964	0.66277	0.36078	0.35646	0.33705	0.45083	0.43369	0.49	0.55684	0.40047	0.49986	0.63473	0.38049	0.6295	0.34442	0.3609	0.36391	0.62724	0.45493	0.36445	0.41758	0.41766	1	0.67724	0.035853	0.37109	0.5662	-0.10243	-0.29808	-0.14127
2-Hydroxyglutarate	0.24619	0.029108	0.31597	0.2243	0.23237	0.36644	0.20826	0.384	-0.12054	-0.15709	0.11411	-0.32816	-0.088399	0.41954	0.39106	0.56928	0.49459	0.48325	0.58902	0.41406	0.46082	0.18505	0.21848	0.36034	0.24417	0.31495	0.26776	0.33092	0.37754	0.40456	0.39235	0.32894	0.52324	0.39867	0.33717	0.34009	0.49506	0.36117	0.23726	0.40501	0.32418	0.67724	1	-0.037232	0.32155	0.62453	-0.17665	-0.28396	-0.068996
Tryptophyl-Leucine	-0.082897	-0.27615	-0.068284	0.19895	0.18618	0.076779	0.074208	0.26611	-0.017728	0.28477	-0.029683	0.51025	0.52443	0.031639	0.24274	0.29934	0.32943	0.34317	0.31342	0.11968	0.29683	0.51458	0.49666	0.21694	0.42632	0.46335	0.24799	0.41371	0.35954	0.48784	-0.00033924	0.3612	0.39128	0.27023	0.52656	0.57435	0.38123	0.55291	0.50982	0.55765	0.56799	0.035853	-0.037232	1	0.60356	0.48325	-0.26914	-0.16116	-0.19938
Indolelactic acid	0.4258	-0.06421	0.13582	0.33695	0.41988	0.46625	0.45204	0.61689	0.0089834	0.057329	0.056308	0.30003	0.44165	0.035495	0.388	0.45547	0.52079	0.464	0.46594	0.27571	0.35066	0.76147	0.66918	0.57228	0.69288	0.63952	0.41303	0.71175	0.69315	0.63494	0.43791	0.55159	0.53134	0.55739	0.65688	0.6145	0.75562	0.81518	0.73005	0.78209	0.78989	0.37109	0.32155	0.60356	1	0.66172	0.014017	-0.46618	-0.20042
L-gamma-glutamyl-L	0.092017	-0.15587	0.061413	0.29377	0.39194	0.28824	0.22538	0.59088	-0.090913	-0.0021534	0.21577	0.12305	0.2357	0.33626	0.49181	0.53025	0.53913	0.6029	0.6631	0.41177	0.50765	0.48564	0.48764	0.45368	0.50184	0.59451	0.42843	0.61547	0.50877	0.65737	0.46224	0.52084	0.64875	0.33886	0.48135	0.51503	0.51571	0.68117	0.48912	0.62277	0.60875	0.5662	0.62453	0.48325	0.66172	1	-0.3528	-0.30163	-0.18999
6-Phosphonoglucono	0.39717	-0.028361	-0.10363	-0.28663	-0.26512	0.04272	-0.10167	-0.16371	-0.24777	-0.58532	-0.18696	-0.024777	0.048595	-0.42847	-0.3949	-0.39692	-0.46723	-0.5244	-0.54387	-0.36025	-0.5264	0.030472	-0.17514	-0.14363	0.0055775	-0.27844	-0.26231	-0.10896	-0.21947	-0.44524	-0.19663	-0.42823	-0.39357	-0.1949	-0.28527	-0.082827	-0.076898	-0.13335	-0.074442	-0.11883	-0.14935	-0.10243	-0.17665	-0.26914	0.014017	-0.3528	1	0.23082	0.28059
L-Acetylcarnitine	-0.29042	-0.10912	-0.35766	-0.13919	-0.23185	-0.35196	-0.40384	-0.3758	-0.10324	-0.52493	-0.1636	-0.23535	-0.21319	-0.26983	-0.25587	-0.61482	-0.45523	-0.42205	-0.39518	-0.30405	-0.44997	-0.23467	-0.37989	-0.16399	-0.34826	-0.35594	-0.33555	-0.23196	-0.49757	-0.4456	-0.47035	-0.41577	-0.37101	-0.39229	-0.25398	-0.19991	-0.4259	-0.34751	-0.36146	-0.37798	-0.39179	-0.29808	-0.28396	-0.16116	-0.46618	-0.30163	0.23082	1	0.63446
3-Hydroxyisovalery	-0.04222	-0.10676	-0.13817	0.03064	-0.12622	0.0041215	-0.21238	-0.26823	-0.028156	-0.55753	-0.20914	-0.23775	-0.49256	-0.20177	-0.037836	-0.2725	-0.17876	-0.29253	-0.23248	-0.16351	-0.28415	-0.14477	-0.36837	-0.2345	-0.44814	-0.31589	-0.39768	-0.088047	-0.38155	-0.27558	-0.38009	-0.29659	-0.37393	-0.16932	-0.10791	-0.10649	-0.22958	-0.28888	-0.2753	-0.28308	-0.28657	-0.14127	-0.068996	-0.19938	-0.20042	-0.18999	0.28059	0.63446	1
Adenine	-0.11664	-0.17244	0.04312	-0.16218	-0.20445	-0.15215	-0.30508	0.028356	-0.39768	-0.47443	-0.33829	0.13779	0.023831	-0.30419	-0.16465	-0.17093	-0.26823	-0.23121	-0.19144	-0.30978	-0.24607	-0.21533	-0.33679	-0.31629	-0.26992	-0.098623	-0.22653	-0.241	-0.39897	-0.29199	-0.29397	-0.37404	-0.27446	-0.35854	-0.17446	-0.0070386	-0.19084	-0.10449	-0.19251	-0.12473	-0.15071	0.061762	0.16763	0.21399	-0.018017	0.20625	0.2352	0.22885	0.19156
Glycyl-L-leucine	0.19644	0.08345	0.12077	-0.34456	-0.29567	-0.065318	-0.17764	-0.078503	-0.68423	-0.3163	-0.3756	-0.19141	0.08699	-0.40085	-0.38102	-0.30456	-0.53075	-0.45094	-0.40258	-0.51308	-0.2866	-0.26725	-0.32953	-0.06988	-0.12228	-0.3745	-0.25925	-0.41686	-0.33256	-0.50799	-0.25724	-0.48806	-0.30664	-0.22341	-0.38542	-0.3076	-0.15478	-0.21517	-0.26363	-0.21866	-0.30158	0.038776	0.1397	-0.16064	-0.003825	-0.13045	0.37222	-0.035786	-0.21325
L-Glutamine	-0.26508	-0.30826	-0.10877	0.044357	-0.18587	-0.2783	-0.45448	-0.33974	-0.31112	-0.32687	-0.46909	-0.52526	-0.33003	-0.34678	-0.45971	-0.314	-0.25365	-0.25922	-0.23047	-0.45293	-0.53741	-0.41744	-0.38537	-0.24314	-0.4785	-0.3643	-0.55801	-0.49927	-0.37926	-0.46235	-0.5011	-0.35864	-0.48332	-0.23245	-0.21295	-0.34761	-0.39282	-0.41082	-0.45901	-0.37096	-0.40204	-0.49321	0.076436	-0.17918	-0.25618	-0.29061	0.029998	0.24277	0.16687
Cytidine monophosp	-0.282	-0.095374	0.073633	-0.1355	-0.36389	-0.42087	-0.4885	-0.51686	-0.27283	-0.3139	-0.30375	-0.31879	-0.28747	-0.39686	-0.44497	-0.40068	-0.51	-0.4828	-0.41918	-0.50994	-0.61991	-0.54392	-0.56259	-0.40379	-0.44361	-0.51807	-0.69123	-0.477	-0.58103	-0.60666	-0.59949	-0.4163	-0.50955	-0.31349	-0.30991	-0.37815	-0.51292	-0.51002	-0.56728	-0.52197	-0.55806	-0.43182	-0.12416	-0.045353	-0.31256	-0.27954	0.075199	0.5363	0.325
Oxidized glutathio	-0.060715	0.016274	0.24112	-0.1674	-0.35247	-0.28322	-0.37125	-0.59047	-0.19324	-0.35745	-0.31767	-0.37049	-0.42522	-0.33381	-0.30912	-0.28837	-0.44195	-0.49294	-0.42937	-0.4065	-0.52085	-0.62301	-0.62182	-0.42089	-0.55607	-0.53579	-0.63952	-0.52739	-0.61152	-0.6804	-0.5166	-0.4519	-0.52194	-0.34659	-0.40654	-0.46001	-0.44744	-0.63532	-0.60001	-0.56295	-0.60171	-0.32061	0.0087026	-0.28503	-0.3764	-0.44324	0.22753	0.35794	0.37534
4-Hydroxyproline	-0.059027	-0.17947	-0.028128	-0.48894	-0.5809	-0.43447	-0.5555	-0.55481	-0.36539	-0.48383	-0.18441	-0.30243	-0.11011	-0.54782	-0.60035	-0.51764	-0.63313	-0.64777	-0.5929	-0.50401	-0.62329	-0.49414	-0.52287	-0.40293	-0.35104	-0.59812	-0.68934	-0.35524	-0.55961	-0.68635	-0.36493	-0.45534	-0.4688	-0.40069	-0.51406	-0.47284	-0.41239	-0.50818	-0.58517	-0.54459	-0.57254	-0.12748	-0.0095588	-0.29837	-0.19722	-0.30164	0.5615	0.39781	0.22497
Creatine	-0.18948	-0.25803	-0.046936	-0.48474	-0.61427	-0.50491	-0.66076	-0.55628	-0.56447	-0.42524	-0.31736	-0.3061	-0.11661	-0.54478	-0.6232	-0.49615	-0.64613	-0.6091	-0.52158	-0.59886	-0.54217	-0.57479	-0.59188	-0.46675	-0.49217	-0.65576	-0.75323	-0.49612	-0.65315	-0.68386	-0.51185	-0.52567	-0.48009	-0.45252	-0.57488	-0.55584	-0.51835	-0.54307	-0.64753	-0.58011	-0.63293	-0.16958	0.07586	-0.15227	-0.23972	-0.18294	0.30837	0.38314	0.1933
Sarcosine	-0.16777	-0.32721	-0.1511	-0.34647	-0.42813	-0.42323	-0.61308	-0.40649	-0.63293	-0.53603	-0.29626	-0.34752	-0.051567	-0.44399	-0.55341	-0.45098	-0.59225	-0.49346	-0.41892	-0.5578	-0.57119	-0.44459	-0.4423	-0.30283	-0.30996	-0.50301	-0.60705	-0.41694	-0.53072	-0.59313	-0.46689	-0.45613	-0.38451	-0.42691	-0.46484	-0.38178	-0.46007	-0.36957	-0.5325	-0.40551	-0.46444	-0.21065	0.12809	-0.043582	-0.14923	-0.010312	0.31938	0.40223	0.077368
ADP	-0.039865	-0.18107	0.086842	-0.25976	-0.36066	-0.29883	-0.42828	-0.34468	-0.48762	-0.34598	-0.20706	-0.44329	-0.17801	-0.23435	-0.38018	-0.18149	-0.35795	-0.31841	-0.21784	-0.30782	-0.2852	-0.41709	-0.31292	-0.27995	-0.27408	-0.38654	-0.46872	-0.31537	-0.39521	-0.40387	-0.27079	-0.28403	-0.22293	-0.29913	-0.34565	-0.32351	-0.28868	-0.33328	-0.50332	-0.34128	-0.38239	0.090258	0.39899	-0.12493	-0.1241	0.048008	0.17789	0.2155	0.029666
NADH	-0.26912	-0.39402	-0.19124	-0.33915	-0.44364	-0.41662	-0.58606	-0.30969	-0.3354	-0.58403	-0.080176	-0.17585	0.0831	-0.43854	-0.46621	-0.35129	-0.35702	-0.29453	-0.21242	-0.35798	-0.48906	-0.31426	-0.40757	-0.30818	-0.34579	-0.38827	-0.585	-0.20146	-0.37804	-0.38728	-0.21334	-0.24246	-0.1873	-0.15707	-0.29374	-0.29021	-0.28963	-0.26933	-0.34708	-0.302	-0.3386	-0.12628	0.21709	-0.060909	-0.11953	0.06129	0.22535	0.49055	0.26395
Hypoxanthine	0.014269	-0.12734	-0.1457	-0.36046	-0.38132	-0.053421	-0.32742	-0.32221	-0.4562	-0.41957	-0.15887	0.060722	-0.15841	-0.63458	-0.42705	-0.49575	-0.59921	-0.63628	-0.58476	-0.57549	-0.54272	-0.33647	-0.53345	-0.52065	-0.45992	-0.6055	-0.66214	-0.44401	-0.46116	-0.55632	-0.41388	-0.44652	-0.55268	-0.31987	-0.51553	-0.47588	-0.4544	-0.41883	-0.419	-0.44614	-0.47771	-0.33449	-0.36008	-0.11367	-0.030374	-0.26336	0.45029	0.15191	0.36197
Inosine	0.027305	-0.013363	-0.076504	-0.4276	-0.44526	-0.099681	-0.34372	-0.37297	-0.46151	-0.4007	-0.17337	0.054452	-0.11037	-0.60596	-0.49623	-0.53921	-0.71969	-0.75204	-0.69833	-0.62432	-0.5537	-0.40247	-0.57682	-0.51344	-0.40108	-0.68217	-0.64625	-0.47793	-0.51931	-0.63487	-0.44731	-0.49457	-0.58066	-0.36653	-0.55435	-0.47387	-0.47822	-0.45216	-0.47751	-0.50464	-0.54112	-0.26079	-0.36587	-0.14616	-0.10216	-0.34555	0.53124	0.24186	0.2946
D-Ribose 5-phospha	-0.12615	-0.055771	-0.15042	-0.53364	-0.5336	-0.12786	-0.44576	-0.45637	-0.33387	-0.43276	-0.055741	0.021411	-0.16927	-0.4484	-0.52137	-0.50729	-0.64078	-0.68498	-0.63644	-0.50583	-0.53918	-0.58406	-0.74214	-0.58214	-0.57293	-0.80759	-0.69085	-0.58776	-0.52329	-0.66828	-0.43764	-0.49125	-0.54794	-0.31614	-0.62779	-0.54493	-0.56205	-0.57807	-0.55667	-0.59342	-0.66901	-0.34082	-0.26989	-0.3592	-0.35367	-0.47505	0.47663	0.22419	0.33677
L-Threonic Acid	-0.11682	-0.1478	-0.296	-0.46649	-0.50899	-0.25814	-0.48803	-0.47408	-0.51193	-0.39139	-0.26806	0.041385	-0.12208	-0.6369	-0.62124	-0.69441	-0.83282	-0.84756	-0.80759	-0.72025	-0.6062	-0.46318	-0.60326	-0.57294	-0.53441	-0.74589	-0.69085	-0.57804	-0.67162	-0.72651	-0.58009	-0.66958	-0.71745	-0.52711	-0.73186	-0.61124	-0.67275	-0.56203	-0.57309	-0.62546	-0.65011	-0.43744	-0.50735	-0.19626	-0.25701	-0.40222	0.4693	0.31545	0.33077
L-Aspartic acid	-0.33447	-0.33931	-0.28594	-0.59523	-0.71341	-0.51902	-0.67005	-0.59486	-0.46585	-0.11952	-0.21544	0.064478	0.03296	-0.62602	-0.78308	-0.61116	-0.70453	-0.70452	-0.6387	-0.5851	-0.43862	-0.50876	-0.46915	-0.6375	-0.5441	-0.72638	-0.74259	-0.50395	-0.62406	-0.56872	-0.59451	-0.51393	-0.59341	-0.50569	-0.64913	-0.56959	-0.65248	-0.56937	-0.62424	-0.62707	-0.63744	-0.34168	-0.32323	-0.0063883	-0.24314	-0.31628	0.27162	0.26659	0.15341
Glycerol 3-phospha	-0.098573	-0.14441	-0.19387	-0.33592	-0.45078	-0.15506	-0.4843	-0.35925	-0.42886	-0.61614	-0.29099	-0.14167	-0.089238	-0.50941	-0.62019	-0.57442	-0.64804	-0.6992	-0.63475	-0.62609	-0.66229	-0.507	-0.65254	-0.42712	-0.51114	-0.6913	-0.6819	-0.61743	-0.48758	-0.70757	-0.51369	-0.58104	-0.58771	-0.22703	-0.54318	-0.45074	-0.48599	-0.46792	-0.49155	-0.47289	-0.57716	-0.43015	-0.076004	-0.3089	-0.28442	-0.39935	0.47378	0.33048	0.27294
Taurine	-0.038603	-0.026877	-0.071108	-0.38733	-0.46724	-0.19825	-0.43014	-0.29592	-0.6322	-0.51365	-0.47984	-0.067374	-0.061881	-0.57955	-0.63109	-0.58266	-0.79023	-0.75315	-0.7129	-0.7649	-0.63031	-0.43423	-0.62304	-0.45598	-0.40949	-0.68032	-0.59947	-0.61484	-0.62475	-0.72341	-0.63669	-0.6996	-0.68402	-0.40818	-0.49905	-0.36685	-0.49827	-0.42811	-0.48809	-0.48491	-0.54807	-0.3015	-0.24498	-0.094561	-0.24176	-0.37778	0.55381	0.3939	0.26697
3-Phosphoglyceric	0.00795	-0.11319	-0.11407	-0.32402	-0.32403	0.046309	-0.31645	-0.13636	-0.54984	-0.57822	-0.053278	-0.053206	-0.064325	-0.31701	-0.35368	-0.27713	-0.44509	-0.39433	-0.26266	-0.37556	-0.30528	-0.30738	-0.48559	-0.2905	-0.36034	-0.58606	-0.49882	-0.33001	-0.31418	-0.35562	-0.29598	-0.31358	-0.27397	-0.095937	-0.40772	-0.28215	-0.3171	-0.24461	-0.31535	-0.2748	-0.37619	-0.080425	0.17205	-0.16882	-0.060787	0.037995	0.33164	0.23319	0.3463
D-Erythrose 4-phos	-0.27321	-0.17712	-0.1247	-0.44881	-0.48122	-0.31249	-0.5596	-0.3509	-0.43863	-0.50529	-0.069977	-0.025343	-0.138	-0.34142	-0.37072	-0.39934	-0.56528	-0.47042	-0.4049	-0.47977	-0.47313	-0.53955	-0.72999	-0.54932	-0.53653	-0.6728	-0.63636	-0.46521	-0.60818	-0.55138	-0.41164	-0.45676	-0.39545	-0.34971	-0.55371	-0.39821	-0.5461	-0.44924	-0.53475	-0.53474	-0.60142	-0.19628	-0.074225	-0.14868	-0.34296	-0.06329	0.23016	0.3912	0.41333
Glucose 6-phosphat	-0.26691	-0.21717	-0.20247	-0.41895	-0.37704	-0.20885	-0.44698	-0.17488	-0.47626	-0.37042	-0.066128	0.1291	-0.068023	-0.27049	-0.3368	-0.30316	-0.43339	-0.31509	-0.22502	-0.33421	-0.21962	-0.43958	-0.53106	-0.43524	-0.49958	-0.57303	-0.45507	-0.36162	-0.47328	-0.32198	-0.36275	-0.32493	-0.34236	-0.34775	-0.48015	-0.32857	-0.50959	-0.31751	-0.43936	-0.41056	-0.44901	-0.15373	-0.034705	-0.03638	-0.19221	0.10666	0.096145	0.19991	0.33494
Pyruvic acid	-0.27312	-0.35983	-0.2022	-0.27876	-0.37312	-0.19154	-0.42983	-0.47453	-0.24041	-0.16893	-0.042101	0.058656	-0.15902	-0.46473	-0.31514	-0.30779	-0.32184	-0.29276	-0.26088	-0.3084	-0.3743	-0.33732	-0.40904	-0.51984	-0.56203	-0.55876	-0.61734	-0.35417	-0.41739	-0.3332	-0.49458	-0.24247	-0.42759	-0.21503	-0.31899	-0.22985	-0.43207	-0.47024	-0.40187	-0.41937	-0.42457	-0.51553	-0.36176	0.066036	-0.16095	-0.30915	0.16388	0.14945	0.45217
Hypotaurine	-0.26944	-0.428	-0.42095	-0.48789	-0.54783	-0.28915	-0.62493	-0.506	-0.5235	-0.42605	-0.19665	-0.067567	-0.21919	-0.61986	-0.59725	-0.60267	-0.63433	-0.6561	-0.59308	-0.55368	-0.50738	-0.4687	-0.56358	-0.58571	-0.66909	-0.70676	-0.74961	-0.48031	-0.63948	-0.5981	-0.53467	-0.58253	-0.63904	-0.52553	-0.70859	-0.59908	-0.66009	-0.59337	-0.60029	-0.61651	-0.63886	-0.39507	-0.29249	-0.24115	-0.22132	-0.24641	0.37434	0.21884	0.44616
Niacinamide	-0.222	-0.314	-0.17628	-0.36877	-0.49538	-0.28058	-0.55648	-0.52999	-0.46764	-0.40172	-0.25281	-0.037142	-0.26015	-0.67107	-0.50231	-0.54137	-0.60784	-0.63577	-0.56455	-0.58567	-0.56781	-0.52734	-0.63387	-0.64374	-0.7157	-0.6702	-0.79867	-0.56406	-0.67935	-0.64952	-0.60007	-0.57119	-0.66898	-0.49364	-0.65151	-0.56531	-0.6338	-0.63077	-0.60361	-0.61984	-0.65092	-0.46553	-0.27935	-0.13932	-0.21025	-0.28746	0.30258	0.2238	0.43898
D-Sedoheptulose 7-	-0.37156	-0.29946	-0.40069	-0.46409	-0.46173	-0.33279	-0.57801	-0.45261	-0.47635	-0.31681	-0.17284	-0.019306	-0.22762	-0.35259	-0.48173	-0.54672	-0.58472	-0.50682	-0.43694	-0.41021	-0.30738	-0.54387	-0.56465	-0.47336	-0.66843	-0.70161	-0.53506	-0.50972	-0.66207	-0.50641	-0.60549	-0.54323	-0.57427	-0.61229	-0.68716	-0.5077	-0.73495	-0.57439	-0.61429	-0.61479	-0.64676	-0.38606	-0.26704	-0.21713	-0.42515	-0.21125	0.1774	0.3341	0.41502
Xanthine	-0.2733	-0.24482	-0.29087	-0.49893	-0.47143	-0.21281	-0.48989	-0.45129	-0.28741	-0.26686	0.076889	0.083543	-0.2073	-0.39139	-0.39654	-0.42189	-0.50277	-0.50991	-0.45418	-0.3668	-0.3486	-0.53946	-0.62115	-0.59755	-0.64242	-0.68855	-0.63062	-0.449	-0.5255	-0.48783	-0.30881	-0.37526	-0.45266	-0.41343	-0.69615	-0.62114	-0.62491	-0.57637	-0.55306	-0.60751	-0.628	-0.30958	-0.2937	-0.32624	-0.30736	-0.2254	0.19831	0.077197	0.33193
Oxypurinol	-0.31691	-0.29777	-0.3148	-0.46144	-0.46943	-0.19712	-0.52299	-0.46376	-0.31327	-0.28972	0.065187	0.079148	-0.21634	-0.42921	-0.40904	-0.43431	-0.4911	-0.49909	-0.43279	-0.3815	-0.37102	-0.51866	-0.62235	-0.60462	-0.66452	-0.7016	-0.6759	-0.45046	-0.52311	-0.47003	-0.37745	-0.37047	-0.46676	-0.39576	-0.66245	-0.57388	-0.62918	-0.57371	-0.54318	-0.59387	-0.62582	-0.36032	-0.29089	-0.26751	-0.28553	-0.21774	0.19364	0.12463	0.38928
Choline	-0.16306	0.01667	-0.12069	-0.49081	-0.51449	-0.53191	-0.35168	-0.48062	-0.32652	0.21695	-0.18703	-0.11957	0.060675	-0.47523	-0.61093	-0.59648	-0.69521	-0.60992	-0.63375	-0.48429	-0.33384	-0.35323	-0.22693	-0.2973	-0.194	-0.47267	-0.3366	-0.40152	-0.51783	-0.54103	-0.36377	-0.51177	-0.49036	-0.50099	-0.54937	-0.4976	-0.47057	-0.49579	-0.48931	-0.55718	-0.52284	-0.21053	-0.51502	-0.20646	-0.32934	-0.49037	0.20997	0.16522	-0.24071
L-Arginine	-0.2322	-0.0084686	-0.17726	-0.5048	-0.4952	-0.37992	-0.28256	-0.39044	-0.21529	0.25276	-0.1044	-0.016224	-0.093389	-0.18398	-0.4471	-0.36112	-0.45681	-0.44093	-0.41884	-0.16119	0.082293	-0.37005	-0.18135	-0.38788	-0.41263	-0.40052	-0.15291	-0.33536	-0.5196	-0.31835	-0.24042	-0.48877	-0.39979	-0.53928	-0.58989	-0.50135	-0.48249	-0.53877	-0.4741	-0.54725	-0.49199	0.058555	-0.25061	-0.34483	-0.4846	-0.36105	0.041256	0.070319	-0.024719
L-Glutamic acid	-0.20537	0.00039312	0.098406	-0.29081	-0.41223	-0.22605	-0.47519	-0.50199	-0.18487	-0.42477	-0.18539	-0.17407	-0.436	-0.14271	-0.35453	-0.24889	-0.4869	-0.52114	-0.46889	-0.4434	-0.50583	-0.78615	-0.86849	-0.68314	-0.70773	-0.72878	-0.68161	-0.69297	-0.6505	-0.68099	-0.47107	-0.4802	-0.53877	-0.37087	-0.57833	-0.54545	-0.63578	-0.66264	-0.68225	-0.664	-0.72475	-0.31145	-0.019036	-0.38456	-0.59665	-0.39215	0.20391	0.28153	0.40543
L-Carnitine	-0.38822	-0.068731	-0.3195	-0.37318	-0.47455	-0.56663	-0.5805	-0.58507	-0.16596	-0.34381	-0.26328	-0.28992	-0.33782	-0.31438	-0.52184	-0.75287	-0.66977	-0.64069	-0.63856	-0.49559	-0.56005	-0.64737	-0.69274	-0.45316	-0.65439	-0.64089	-0.52947	-0.64566	-0.75483	-0.75818	-0.58689	-0.69936	-0.64854	-0.64537	-0.69533	-0.64423	-0.75988	-0.70405	-0.68997	-0.74611	-0.779	-0.45814	-0.38108	-0.51932	-0.80476	-0.57426	0.19395	0.69974	0.38147
L-Lactic acid	0.022976	-0.10162	-0.043068	-0.15036	-0.38298	-0.22695	-0.39093	-0.52266	-0.10591	-0.43206	-0.36993	-0.17278	-0.23667	-0.38918	-0.51715	-0.43045	-0.53028	-0.64038	-0.6349	-0.56753	-0.68958	-0.48524	-0.57664	-0.52506	-0.5281	-0.58887	-0.66722	-0.59713	-0.51408	-0.70638	-0.53492	-0.55658	-0.65438	-0.2059	-0.47076	-0.41781	-0.45996	-0.54231	-0.47641	-0.49508	-0.54232	-0.57034	-0.23883	-0.311	-0.40427	-0.61341	0.4737	0.27671	0.38325
2-Hydroxycaproic a	-0.032167	-0.012311	0.12147	-0.024093	-0.23696	-0.23916	-0.34097	-0.38744	-0.35698	-0.23674	-0.43181	-0.38084	-0.43764	-0.36576	-0.47865	-0.35074	-0.56336	-0.56835	-0.56297	-0.66059	-0.64021	-0.56857	-0.58467	-0.58054	-0.54373	-0.49346	-0.58861	-0.74539	-0.63395	-0.70953	-0.45535	-0.65299	-0.71626	-0.48814	-0.65164	-0.60813	-0.60854	-0.6144	-0.60191	-0.61837	-0.63505	-0.42042	-0.15075	-0.44289	-0.45209	-0.40944	0.23125	0.018322	0.0072083
LysoPC(14:0)	-0.021817	0.12889	0.29205	0.098463	-0.10468	-0.27584	-0.10013	-0.34863	-0.20761	0.24454	-0.48744	-0.34526	-0.45915	-0.051496	-0.037737	-0.032566	-0.17711	-0.14541	-0.11355	-0.3007	-0.026803	-0.36578	-0.28945	-0.23541	-0.4536	-0.23454	-0.27449	-0.44185	-0.48536	-0.32415	-0.45058	-0.39232	-0.36473	-0.28544	-0.29366	-0.44776	-0.3479	-0.43639	-0.3824	-0.39805	-0.39496	-0.22737	-0.066552	-0.092599	-0.34388	-0.22835	-0.39022	0.014235	0.17009
Lysyl-Leucine	-0.039865	0.25604	0.1235	-0.030488	-0.071494	-0.013743	-0.071178	-0.11607	-0.42737	-0.066638	-0.45568	0.1064	-0.18136	-0.34517	-0.17632	-0.37832	-0.56954	-0.50009	-0.51632	-0.61238	-0.34725	-0.33699	-0.49088	-0.35933	-0.3728	-0.38865	-0.23758	-0.66245	-0.54472	-0.53136	-0.58448	-0.60299	-0.60781	-0.44802	-0.4027	-0.27377	-0.46429	-0.36899	-0.31973	-0.38879	-0.42113	-0.3947	-0.50434	0.036486	-0.30388	-0.38794	0.093799	0.13798	0.048693
sn-2 LysoPC(18:2)	-0.42016	-0.2442	-0.26273	-0.42009	-0.31868	-0.30406	-0.30413	-0.33245	0.039149	0.36725	0.34974	0.2229	0.14452	0.059001	-0.10449	-0.031959	-0.083079	-0.055155	-0.069849	0.12978	0.21774	-0.29817	-0.038985	-0.44109	-0.28027	-0.19955	-0.070535	-0.18844	-0.16797	-0.0044013	0.077646	0.052348	0.093951	-0.24391	-0.3171	-0.24568	-0.29754	-0.31125	-0.31054	-0.27962	-0.2189	0.033916	-0.16525	0.089852	-0.31206	-0.085025	-0.30498	-0.13454	-0.30494
sn-1 LysoPC(18:2)	-0.37139	-0.057014	-0.094456	-0.2356	-0.16428	-0.27042	-0.2046	-0.23726	0.011968	0.30626	0.083224	0.045426	-0.054986	0.09866	0.090803	-0.032779	-0.03721	0.0088075	-0.036093	0.039011	0.19677	-0.29557	-0.15761	-0.34512	-0.32125	-0.12692	0.0064741	-0.28383	-0.24929	-0.074513	-0.033772	-0.047627	0.042595	-0.28825	-0.18585	-0.20246	-0.2429	-0.29144	-0.29924	-0.27113	-0.2212	0.056646	-0.16309	0.097621	-0.40685	-0.15762	-0.40164	0.038676	-0.15387
LysoPC(20:4(5Z,8Z,	-0.37807	-0.041071	-0.15009	-0.31161	-0.22823	-0.329	-0.25204	-0.31696	0.0089331	0.23502	0.074181	0.14113	-0.065261	0.029384	-0.03787	-0.16687	-0.21157	-0.16047	-0.21737	-0.061299	0.021669	-0.39682	-0.25405	-0.48325	-0.38016	-0.22912	-0.078977	-0.39985	-0.36892	-0.22455	-0.14479	-0.17641	-0.12991	-0.42437	-0.32605	-0.2907	-0.41704	-0.3916	-0.39459	-0.38091	-0.32389	-0.11411	-0.3607	0.065743	-0.50435	-0.26682	-0.25979	0.10695	-0.12364
LysoPE(16:0)	-0.54934	-0.33063	-0.31768	-0.38997	-0.45295	-0.51202	-0.49825	-0.52833	-0.075628	0.19843	-0.015971	0.044783	-0.094498	-0.31853	-0.36267	-0.37679	-0.2899	-0.29594	-0.3086	-0.21155	-0.19103	-0.51967	-0.33286	-0.63602	-0.65611	-0.37212	-0.44916	-0.53576	-0.46623	-0.36752	-0.31362	-0.3039	-0.3309	-0.41503	-0.47595	-0.55878	-0.57556	-0.60222	-0.539	-0.53723	-0.49563	-0.41677	-0.37727	-0.011546	-0.48322	-0.36208	-0.31663	0.077709	-0.052208
sn-2 LysoPC(18:0)	-0.32375	-0.010023	-0.19609	-0.22633	-0.23673	-0.2259	-0.3354	-0.34112	-0.18296	-0.15563	-0.080547	-0.046323	-0.21326	-0.054934	-0.13628	-0.33835	-0.39611	-0.3722	-0.35789	-0.27919	-0.18633	-0.49513	-0.47125	-0.50986	-0.52159	-0.47728	-0.30496	-0.57367	-0.47148	-0.40479	-0.38495	-0.32429	-0.29134	-0.3523	-0.36956	-0.31832	-0.51274	-0.43583	-0.52683	-0.44884	-0.45867	-0.23198	-0.24839	0.012175	-0.54579	-0.30101	-0.15369	0.4439	0.21204
LysoPE(20:4)	-0.16243	0.0221	-0.089518	-0.13431	-0.10731	-0.15195	-0.16183	-0.25643	-0.23427	0.023376	-0.18522	-0.0075117	-0.18804	-0.11259	-0.06312	-0.24662	-0.31563	-0.27923	-0.31662	-0.27953	-0.1672	-0.33161	-0.28202	-0.43324	-0.37799	-0.25602	-0.16725	-0.54243	-0.39375	-0.35397	-0.35461	-0.33691	-0.29561	-0.41677	-0.31032	-0.28623	-0.41701	-0.36007	-0.37467	-0.32144	-0.30807	-0.27027	-0.35676	0.11861	-0.39113	-0.31225	-0.11292	0.16576	-0.029398
sn-1 LysoPC(18:0)	-0.39752	-0.16218	-0.21557	-0.30257	-0.31159	-0.38215	-0.37507	-0.45897	-0.12027	0.12011	-0.10828	0.060904	-0.095585	-0.24943	-0.19142	-0.35733	-0.3264	-0.3266	-0.3605	-0.26861	-0.19622	-0.44785	-0.34522	-0.49861	-0.50821	-0.33122	-0.33455	-0.52231	-0.44879	-0.40511	-0.37436	-0.30894	-0.2979	-0.4246	-0.37723	-0.42634	-0.48876	-0.49091	-0.45854	-0.43803	-0.41714	-0.37948	-0.43357	0.11546	-0.41701	-0.37738	-0.22187	0.17606	-0.022354
sn-1 LysoPC(16:0)	-0.38553	-0.12841	-0.15671	-0.19132	-0.21551	-0.33016	-0.29636	-0.38478	-0.083819	0.19918	-0.11212	0.0048153	-0.17476	-0.11738	-0.093423	-0.22294	-0.21002	-0.19856	-0.23436	-0.1884	-0.088701	-0.41559	-0.28483	-0.48755	-0.50412	-0.25304	-0.24661	-0.50387	-0.40503	-0.30159	-0.31511	-0.25528	-0.24394	-0.38301	-0.3135	-0.38087	-0.45134	-0.45344	-0.42972	-0.39816	-0.36275	-0.31707	-0.35368	0.11135	-0.44375	-0.31516	-0.3531	0.10564	-0.03414
sn-2 LysoPC(16:0)	-0.26732	-0.078804	-0.13201	-0.17015	-0.16459	-0.31594	-0.26427	-0.33825	-0.1518	0.046739	-0.15857	-0.10574	-0.20463	-0.1138	-0.088264	-0.23149	-0.27104	-0.22628	-0.26321	-0.26187	-0.17492	-0.41135	-0.31535	-0.44465	-0.4645	-0.27322	-0.24426	-0.50568	-0.42988	-0.3634	-0.25367	-0.28044	-0.25517	-0.38029	-0.33613	-0.42223	-0.44227	-0.42554	-0.44942	-0.4034	-0.35656	-0.27984	-0.30922	0.026464	-0.43432	-0.28236	-0.26974	0.16227	-0.0033558
cis-5-Tetradecenoy	-0.11377	0.23097	0.035424	0.19756	0.1742	0.11068	0.19085	-0.032123	0.28536	0.14546	-0.05219	0.12004	-0.18634	0.1588	0.16514	-0.023998	0.014614	-0.0037522	-0.076156	0.095498	-0.032534	-0.09905	-0.03635	-0.14786	-0.14497	0.014154	0.16287	-0.24583	-0.072918	-0.049666	-0.23295	-0.077172	-0.19946	-0.036264	0.16371	0.21627	-0.11376	-0.14157	-0.057911	-0.05566	-0.018419	-0.34246	-0.42735	0.11257	-0.35283	-0.4382	-0.12191	0.17834	0.14274
Dodecanoylcarnitin	-0.075859	0.13038	-0.050443	0.38664	0.29377	0.252	0.15331	0.013836	0.084811	-0.12081	-0.16542	-0.068649	-0.32512	0.066609	0.10087	-0.092697	-0.074521	-0.098033	-0.1433	-0.064514	-0.24684	-0.044712	-0.050541	-0.11126	-0.1337	-0.024543	0.040024	-0.27781	-0.10129	-0.11701	-0.37128	-0.174	-0.33921	-0.045515	0.15948	0.2683	-0.17051	-0.1121	-0.082452	-0.036188	-0.022156	-0.47842	-0.38504	0.1039	-0.24025	-0.35159	0.01184	0.27114	0.28307
L-Octanoylcarnitin	-0.055336	0.21364	0.065772	0.37503	0.27251	0.29394	0.2386	0.061564	0.23618	-0.035905	-0.053651	0.0065653	-0.3202	0.12867	0.18687	0.029698	0.058343	-0.0027331	-0.031599	0.067029	-0.13676	-0.037057	-0.049404	-0.12895	-0.13031	0.0078584	0.04316	-0.19363	0.005678	-0.0098282	-0.24762	-0.033189	-0.22261	0.14284	0.27632	0.29656	-0.05773	-0.064264	-0.025546	0.011756	0.025776	-0.37447	-0.31091	0.11956	-0.19056	-0.3108	-0.10736	0.20724	0.3417
O-decanoyl-L-carni	-0.11819	0.17598	-0.02291	0.27486	0.23381	0.24301	0.19587	0.07995	0.17183	0.015361	-0.0059216	0.11404	-0.20673	0.040476	0.14661	-0.07951	-0.0019549	-0.035515	-0.065894	0.0483	-0.1023	-0.052149	-0.030341	-0.13988	-0.13407	-0.010593	0.072212	-0.22413	0.0036733	-0.0068463	-0.24207	-0.022495	-0.21977	0.050843	0.2087	0.27026	-0.098582	-0.058761	-0.053791	-0.0056468	0.012791	-0.36981	-0.38482	0.17979	-0.15996	-0.28309	-0.12732	0.17623	0.20255
Tetradecanoylcarni	-0.083278	0.084309	-0.029043	0.38181	0.24158	0.10169	0.017695	-0.079912	-0.11127	-0.15417	-0.44656	-0.2493	-0.40806	-0.032271	0.036131	-0.18778	-0.19304	-0.20737	-0.26099	-0.30006	-0.3297	-0.16213	-0.17863	-0.1564	-0.25863	-0.083887	-0.068334	-0.46509	-0.29057	-0.31029	-0.51007	-0.3691	-0.4583	-0.22495	0.015366	0.064051	-0.27335	-0.22156	-0.22169	-0.1551	-0.14899	-0.50279	-0.34745	0.085264	-0.3135	-0.38511	-0.042717	0.28866	0.23024
L-Palmitoylcarniti	-0.20585	0.0074936	-0.11703	0.095171	0.052477	-0.00059303	-0.071418	-0.2027	-0.11015	-0.008781	-0.20413	-0.15629	-0.36448	-0.058943	0.015023	-0.20883	-0.17122	-0.20131	-0.23481	-0.15903	-0.18723	-0.28658	-0.20502	-0.30171	-0.38804	-0.14342	-0.12746	-0.4936	-0.2955	-0.29602	-0.38316	-0.31058	-0.33788	-0.29766	-0.15365	-0.16519	-0.35542	-0.35108	-0.32535	-0.2534	-0.24774	-0.40143	-0.32209	0.030972	-0.36334	-0.35542	-0.18701	0.1516	0.090518
Stearoylcarnitine	-0.17961	0.14115	0.013819	0.12579	0.091728	-0.046596	-0.037528	-0.21327	0.11342	-0.01521	-0.15843	-0.058901	-0.28034	-0.042413	0.082777	-0.18284	-0.16497	-0.21182	-0.28986	-0.22466	-0.30886	-0.32097	-0.32809	-0.3145	-0.32712	-0.13634	-0.14393	-0.48986	-0.26975	-0.35903	-0.26564	-0.20691	-0.28164	-0.218	-0.1027	-0.19912	-0.30566	-0.32095	-0.27583	-0.26449	-0.24457	-0.43563	-0.42927	0.020181	-0.39626	-0.46238	-0.16735	0.20961	0.042874
D-Glyceraldehyde 3	0.21004	0.10025	0.1799	0.036421	-0.061422	0.17439	0.09368	-0.15115	0.25923	-0.12436	-0.092314	-0.15843	-0.27305	-0.010713	-0.0019216	0.028829	0.1127	-0.10425	-0.098891	0.10879	-0.06824	-0.20215	-0.1419	-0.13663	-0.27462	-0.11467	-0.13384	-0.19359	0.021993	-0.1685	-0.041693	-0.060306	-0.17626	0.15279	0.0047132	-0.053714	0.077587	-0.21878	-0.13645	-0.088671	-0.11624	-0.09332	0.15963	-0.33138	-0.12457	-0.42574	0.20336	-0.15227	0.21866
Succinic acid	-0.096914	0.075553	0.24502	0.39085	0.17646	0.082753	0.10183	-0.10813	0.23302	0.12208	-0.12033	-0.24262	-0.44118	0.13291	0.18325	0.18144	0.1893	0.15453	0.11894	0.079868	-0.11632	-0.13083	-0.093577	-0.18733	-0.2457	0.066355	-0.064247	-0.2271	-0.095135	-0.044376	-0.20883	-0.082917	-0.18636	0.073456	0.15984	0.13787	-0.057572	-0.22299	-0.09029	-0.088701	-0.082393	-0.31646	-0.068847	-0.053202	-0.293	-0.28279	-0.22472	-0.017452	0.20717
Hexanoylcarnitine	-0.026771	0.16825	-0.024766	0.43043	0.25708	0.25755	0.15607	0.020858	0.2094	-0.30202	-0.14849	-0.22689	-0.44892	0.068067	0.080888	-0.098484	-0.036002	-0.13965	-0.15067	-0.045472	-0.31433	-0.069294	-0.13113	-0.13367	-0.20924	-0.037841	-0.070327	-0.22937	-0.089249	-0.15177	-0.24713	-0.17783	-0.33095	0.1126	0.17704	0.16283	-0.11923	-0.13455	-0.10896	-0.072415	-0.060448	-0.38381	-0.21444	-0.1214	-0.27703	-0.3387	0.0085246	0.40598	0.51273
Butyrylcarnitine	0.084071	0.19444	0.18856	0.28436	0.092931	0.10647	-0.021373	-0.042936	0.02595	-0.59895	-0.38193	-0.31846	-0.4311	-0.18549	-0.011959	-0.20295	-0.21392	-0.3098	-0.32305	-0.38258	-0.58026	-0.24239	-0.49932	-0.22857	-0.32903	-0.19937	-0.32466	-0.38364	-0.30943	-0.46618	-0.27466	-0.35353	-0.43358	0.0024075	0.0006836	-0.067498	-0.1334	-0.224	-0.22334	-0.22045	-0.24361	-0.2875	-0.057571	-0.24723	-0.26385	-0.35805	0.24286	0.46008	0.54933
2-Hydroxybutyric a	0.098317	0.095436	0.043538	0.39743	0.20836	0.027735	-0.039055	-0.02453	-0.40403	-0.29532	-0.68787	-0.19531	-0.21449	-0.2476	-0.27335	-0.29157	-0.48099	-0.40867	-0.43263	-0.70457	-0.61928	-0.13938	-0.2505	-0.081364	-0.1165	-0.21478	-0.24816	-0.5153	-0.37146	-0.47322	-0.6535	-0.5189	-0.648	-0.24043	-0.14612	-0.078165	-0.37416	-0.13039	-0.18211	-0.16515	-0.18642	-0.68953	-0.38677	0.12624	-0.10408	-0.2603	0.16942	0.2357	0.099543
3-Hydroxyisovaleri	0.061799	0.10712	0.18788	0.64926	0.41834	0.19245	0.085256	0.13491	-0.19664	-0.24102	-0.50744	-0.35593	-0.42298	-0.034792	0.026758	-0.0098147	-0.087915	-0.058043	-0.068906	-0.41964	-0.41872	-0.063885	-0.19197	-0.02927	-0.137	0.025812	-0.12472	-0.38995	-0.17946	-0.21858	-0.37851	-0.28292	-0.40581	-0.10356	0.010028	0.0050302	-0.19922	-0.052747	-0.069595	-0.051226	-0.079186	-0.45878	-0.042256	-0.027279	-0.10798	-0.069527	-0.07313	0.096697	0.091195
Uridine 5'-monopho	-0.022867	0.0048029	0.14866	0.10645	-0.089223	-0.19644	-0.21009	-0.20683	-0.27902	-0.32573	-0.39402	-0.43233	-0.21882	-0.12647	-0.21347	-0.1781	-0.2431	-0.20414	-0.13492	-0.26507	-0.31294	-0.19252	-0.17563	0.012645	-0.09207	-0.1679	-0.2672	-0.19227	-0.29294	-0.29953	-0.46145	-0.26569	-0.25453	-0.15427	0.022696	0.0091118	-0.15219	-0.14838	-0.25889	-0.13893	-0.18661	-0.12138	0.20794	0.067077	-0.11945	-0.058685	0.10554	0.53372	0.25637
Guanosine monophos	-0.012907	0.14148	0.31655	0.084794	-0.096688	-0.18364	-0.20371	-0.26908	-0.28562	-0.27829	-0.38521	-0.50035	-0.37348	-0.14933	-0.15728	-0.15912	-0.31253	-0.286	-0.21645	-0.35045	-0.33079	-0.35668	-0.35973	-0.11534	-0.20261	-0.29641	-0.35327	-0.3083	-0.41071	-0.40629	-0.42226	-0.27253	-0.31797	-0.24569	-0.085495	-0.15233	-0.22815	-0.28519	-0.41955	-0.31355	-0.34014	-0.03252	0.18009	-0.057985	-0.18328	-0.13306	0.062474	0.47451	0.24778
trans-2-Tetradecen	-0.075862	0.099983	-0.088964	-0.10059	-0.032608	-0.20928	-0.11476	0.076625	-0.36745	-0.29463	-0.21858	-0.35539	-0.055474	-0.081977	-0.3825	-0.28517	-0.41611	-0.18826	-0.20895	-0.32756	-0.43804	-0.19874	-0.18223	0.063286	0.051192	-0.20399	-0.055421	-0.24113	-0.25041	-0.32576	-0.14419	-0.32477	-0.29996	-0.21701	-0.14411	-0.149	-0.2891	-0.10072	-0.24201	-0.20983	-0.19285	-0.18226	-0.10705	-0.2627	-0.25258	-0.075416	0.1679	0.3014	-0.11921
Acetaminophen	0.3889	0.46013	0.33312	0.17288	0.093324	0.11036	0.27401	0.16449	-0.3355	0.12435	-0.39744	-0.34244	-0.10877	-0.16852	-0.20144	-0.14921	-0.29253	-0.23536	-0.22565	-0.40004	-0.1561	0.043147	0.01351	0.14686	0.19457	-0.11759	-0.00131	-0.2428	-0.012663	-0.18174	-0.15261	-0.21852	-0.26074	0.060221	0.012139	-0.10444	0.043072	0.044553	-0.055233	-0.044025	-0.062553	0.020819	-0.078353	-0.11914	0.073257	-0.20657	0.082326	-0.041882	-0.24553
Adenosine 3'-monop	0.26233	0.353	0.33421	0.0036067	-0.061398	-0.027923	0.12438	0.14352	-0.41016	-0.17788	-0.38723	-0.30859	-0.016471	-0.19777	-0.16975	-0.17344	-0.28193	-0.17615	-0.12546	-0.27508	-0.11982	-0.048237	-0.078864	0.060582	0.019155	-0.082356	0.020484	-0.26862	-0.17656	-0.23447	-0.17154	-0.33356	-0.18668	-0.026627	-0.0054735	0.0030218	0.055432	-0.027526	-0.104	-0.047171	-0.086955	0.18725	0.22909	-0.072043	-0.088789	-0.10187	0.12501	0.25836	-0.087413
L-Proline	-0.37006	-0.19559	0.00065905	-0.19751	-0.30336	-0.53224	-0.32313	-0.5069	0.35112	0.25257	0.12443	-0.26133	-0.30342	-0.02217	-0.17123	-0.058239	0.053374	0.029202	0.003615	0.14601	-0.08192	-0.42206	-0.19698	-0.3289	-0.43821	-0.099136	-0.2549	-0.13587	-0.31616	-0.1885	0.040988	-0.076541	-0.14167	-0.31937	-0.31476	-0.47856	-0.32831	-0.54007	-0.39461	-0.46899	-0.3895	-0.12564	-0.034843	-0.47302	-0.50297	-0.29191	-0.21425	-0.0044982	0.013487
L-Acetopine	-0.3968	-0.1752	-0.12706	-0.3693	-0.45096	-0.47839	-0.42094	-0.44626	-0.10997	0.070535	-0.04803	-0.31697	-0.28074	-0.016561	-0.34819	-0.18507	-0.22502	-0.19209	-0.14766	-0.015846	0.00078563	-0.51754	-0.30233	-0.37669	-0.56493	-0.3185	-0.25997	-0.3478	-0.52487	-0.32068	-0.16322	-0.42936	-0.27117	-0.4285	-0.54684	-0.53872	-0.48619	-0.61363	-0.52721	-0.55665	-0.53778	-0.0015061	0.13648	-0.51841	-0.63526	-0.21359	-0.18219	0.10843	0.06199
(S)-2-Azetidinecar	0.0070251	-0.13831	0.10568	-0.17597	-0.32903	-0.40011	-0.346	-0.25793	-0.069297	-0.15761	-0.29553	-0.15272	-0.034188	-0.17884	-0.41703	-0.085301	-0.22855	-0.23939	-0.25731	-0.41649	-0.40441	-0.37913	-0.37829	-0.45834	-0.31339	-0.31439	-0.4668	-0.37603	-0.2978	-0.38125	-0.096772	-0.21504	-0.27038	-0.092978	-0.29398	-0.43459	-0.25503	-0.25879	-0.34403	-0.32435	-0.30431	-0.1585	0.084632	-0.151	-0.2326	-0.1721	0.10914	-0.026633	-0.028573
Citrulline	-0.36219	-0.28015	-0.042594	-0.21967	-0.38761	-0.51385	-0.42946	-0.36826	0.01031	-0.09881	-0.14938	-0.17019	-0.070114	-0.24005	-0.32695	-0.17665	-0.17043	-0.18052	-0.19865	-0.13415	-0.27889	-0.29838	-0.22415	-0.40018	-0.37377	-0.050907	-0.29553	-0.20893	-0.45648	-0.33234	-0.11849	-0.37858	-0.24087	-0.34283	-0.27967	-0.2881	-0.27573	-0.43025	-0.30423	-0.35733	-0.31139	-0.051075	0.055668	-0.19266	-0.40929	-0.18027	0.037259	0.24306	0.049672
5'-Methylthioadeno	-0.16208	-0.12413	0.23661	-0.15901	-0.29132	-0.34176	-0.31016	-0.51058	0.086133	-0.058898	0.028912	-0.43273	-0.3552	0.0033934	-0.10092	0.059114	0.014907	-0.008049	0.046368	0.095134	-0.13126	-0.49717	-0.305	-0.26038	-0.4088	-0.22718	-0.37039	-0.20844	-0.30801	-0.279	-0.10719	-0.074251	-0.085515	-0.16264	-0.21566	-0.31656	-0.21081	-0.49211	-0.4398	-0.37228	-0.3821	-0.035382	0.34854	-0.33872	-0.35473	-0.18761	-0.079241	0.0801	0.12865
L-Leucine	0.13594	0.25242	0.071018	-0.0054322	-0.13629	-0.31184	-0.16982	-0.24108	-0.37989	-0.22121	-0.71981	-0.34224	-0.36071	-0.22633	-0.46368	-0.49577	-0.71082	-0.64981	-0.67132	-0.72693	-0.54144	-0.44138	-0.46819	-0.23311	-0.32295	-0.43199	-0.29349	-0.63905	-0.67699	-0.7292	-0.5825	-0.79595	-0.79639	-0.57353	-0.57736	-0.54424	-0.59174	-0.43678	-0.50428	-0.54214	-0.53714	-0.40805	-0.359	-0.4015	-0.47902	-0.43675	0.26349	0.27764	0.12285
L-Isoleucine	0.010577	0.0085504	-0.15746	-0.11167	-0.24722	-0.36458	-0.32327	-0.31884	-0.38758	-0.31734	-0.62992	-0.24378	-0.27549	-0.36312	-0.57583	-0.58719	-0.74317	-0.71126	-0.73435	-0.7366	-0.61524	-0.42386	-0.45971	-0.37412	-0.43185	-0.46739	-0.40274	-0.62427	-0.71616	-0.74098	-0.56565	-0.83042	-0.82823	-0.61183	-0.67678	-0.58501	-0.66112	-0.49693	-0.52422	-0.58062	-0.55978	-0.48702	-0.41857	-0.392	-0.47155	-0.43098	0.34786	0.2901	0.18715
L-Valine	-0.078241	-0.1045	-0.20984	0.015574	-0.1948	-0.37319	-0.38808	-0.46524	-0.32291	-0.29094	-0.63222	-0.37589	-0.4018	-0.31759	-0.5321	-0.56004	-0.66967	-0.68228	-0.70102	-0.68611	-0.62164	-0.42072	-0.40036	-0.3752	-0.46811	-0.44684	-0.45702	-0.60396	-0.72196	-0.71419	-0.66888	-0.77535	-0.82432	-0.64374	-0.61585	-0.54011	-0.69281	-0.55151	-0.57084	-0.58921	-0.56203	-0.57935	-0.41287	-0.32268	-0.49472	-0.47553	0.28247	0.39424	0.27781
L-Phenylalanine	-0.080606	-0.051222	-0.10037	-0.10624	-0.27746	-0.4016	-0.33439	-0.50544	-0.24903	-0.038737	-0.58165	-0.21657	-0.39132	-0.30824	-0.45868	-0.47573	-0.57092	-0.59344	-0.60662	-0.56426	-0.41371	-0.48401	-0.42109	-0.40018	-0.56732	-0.43389	-0.41941	-0.60859	-0.71804	-0.66057	-0.63348	-0.74664	-0.78174	-0.6602	-0.68116	-0.65084	-0.68036	-0.62951	-0.54862	-0.62187	-0.60075	-0.53804	-0.42829	-0.35756	-0.50729	-0.50448	0.14055	0.13769	0.20584
L-Tyrosine	0.11888	0.20884	0.15794	0.11268	-0.051377	-0.095159	-0.061401	-0.1878	-0.23983	-0.21398	-0.69463	-0.23281	-0.46255	-0.22475	-0.24556	-0.30937	-0.43907	-0.46849	-0.47818	-0.5247	-0.37122	-0.33972	-0.44213	-0.2292	-0.45703	-0.28965	-0.23841	-0.53716	-0.61076	-0.57524	-0.55026	-0.7284	-0.74232	-0.48456	-0.44278	-0.41357	-0.44685	-0.44517	-0.34652	-0.44259	-0.44335	-0.36337	-0.24982	-0.39317	-0.40734	-0.44514	0.22894	0.15694	0.34238
Coumarin	0.08715	0.20596	0.13623	0.047519	-0.097684	-0.15702	-0.1113	-0.20571	-0.26555	-0.24512	-0.67902	-0.2098	-0.44711	-0.2704	-0.27648	-0.38103	-0.49633	-0.50568	-0.51731	-0.56197	-0.41401	-0.37705	-0.50002	-0.2666	-0.47831	-0.32378	-0.26858	-0.56584	-0.65869	-0.62146	-0.56476	-0.75996	-0.76171	-0.55588	-0.4995	-0.45868	-0.49644	-0.47015	-0.3844	-0.48717	-0.4912	-0.35974	-0.28546	-0.40513	-0.44308	-0.44134	0.25797	0.21465	0.33755
D-Glucose	0.079356	0.16098	0.0089455	-0.059122	-0.12982	-0.25339	-0.16182	-0.28894	-0.24609	-0.22152	-0.37876	-0.37643	-0.25711	-0.11729	-0.28462	-0.38912	-0.56794	-0.54932	-0.58952	-0.43145	-0.41459	-0.27574	-0.26317	-0.13853	-0.12816	-0.19334	-0.11369	-0.38764	-0.55598	-0.60899	-0.30876	-0.68978	-0.49607	-0.5512	-0.51805	-0.35912	-0.39885	-0.39743	-0.36242	-0.4089	-0.40787	-0.12554	-0.20036	-0.44697	-0.46215	-0.36032	0.36299	0.30131	-0.024295
Gamma-Glutamyltyro	0.15582	0.14715	0.14647	0.26773	0.1232	-0.08339	0.049068	0.035164	-0.12472	-0.17588	-0.62477	-0.22064	-0.22183	-0.059259	-0.1033	-0.11205	-0.21559	-0.19886	-0.2602	-0.35943	-0.27593	-0.018947	-0.12038	0.019357	-0.092277	0.097141	0.060282	-0.23628	-0.36855	-0.32885	-0.27888	-0.55366	-0.44487	-0.31682	-0.16375	-0.10515	-0.15305	-0.13307	-0.027719	-0.12667	-0.1042	-0.17936	-0.10672	-0.23171	-0.25985	-0.21775	0.21209	0.1311	0.11369
L-gamma-glutamyl-L	0.18493	0.22532	0.22104	0.20834	0.052641	-0.13748	-0.049627	-0.098186	-0.074755	-0.40692	-0.55361	-0.32515	-0.30639	-0.056451	-0.1697	-0.17924	-0.37621	-0.36483	-0.42383	-0.48359	-0.54368	-0.22487	-0.36946	-0.13851	-0.13872	-0.12017	-0.14569	-0.35951	-0.4635	-0.53746	-0.29069	-0.55061	-0.50691	-0.30392	-0.22925	-0.18628	-0.25483	-0.23495	-0.21739	-0.27419	-0.26011	-0.22916	-0.11682	-0.33561	-0.38291	-0.32697	0.36838	0.3363	0.22135
L-gamma-glutamyl-L	0.05502	0.078018	0.11621	0.22501	0.047588	-0.18371	-0.1624	-0.11977	-0.24287	-0.34365	-0.5798	-0.35554	-0.28006	-0.038199	-0.20429	-0.19173	-0.3769	-0.35106	-0.37698	-0.48488	-0.45361	-0.23937	-0.29685	-0.11061	-0.1496	-0.076375	-0.14364	-0.39559	-0.48038	-0.50068	-0.38819	-0.58955	-0.47126	-0.41407	-0.30581	-0.20907	-0.33202	-0.2326	-0.24706	-0.25076	-0.26864	-0.23282	0.0023843	-0.21926	-0.35003	-0.15426	0.21248	0.2879	0.062241
Deoxyadenosine	-0.010517	-0.056428	0.0664	-0.0066344	-0.1098	-0.31317	-0.21804	-0.040569	-0.38882	-0.3487	-0.49632	-0.42947	-0.28764	-0.19575	-0.32748	-0.20313	-0.34895	-0.21668	-0.24517	-0.44688	-0.52852	-0.33053	-0.32805	-0.26342	-0.27322	-0.16491	-0.28348	-0.43076	-0.46046	-0.47642	-0.26231	-0.53357	-0.4756	-0.2943	-0.26577	-0.29072	-0.34153	-0.26204	-0.37591	-0.31526	-0.29239	-0.2511	0.013857	-0.22728	-0.2816	-0.051366	0.091743	0.10034	0.066529
L-Methionine	0.050299	0.13739	0.11752	0.19976	0.10194	-0.17937	-0.039836	-0.03052	-0.30469	0.0009796	-0.62588	-0.2936	-0.37538	0.023296	-0.046545	-0.13031	-0.27291	-0.21175	-0.23053	-0.37343	-0.084446	-0.19729	-0.18794	-0.01424	-0.21492	-0.014893	0.031125	-0.3285	-0.48944	-0.33153	-0.3556	-0.5667	-0.44894	-0.52959	-0.36085	-0.31919	-0.34435	-0.22537	-0.24034	-0.27747	-0.25786	-0.10253	-0.073994	-0.22339	-0.29032	-0.031111	-0.097469	0.023291	0.042968
Tridecanoic acid	-0.40501	-0.14491	-0.13627	-0.12405	-0.10253	-0.032065	-0.19994	-0.21845	0.41572	0.045897	0.47247	0.097226	-0.14907	0.08954	-0.026141	-0.029765	0.1303	0.070979	0.073597	0.27043	-0.053106	-0.4345	-0.26889	-0.35165	-0.38953	-0.29268	-0.20113	-0.20398	0.037631	0.0035484	0.064127	0.28448	-0.029731	0.036352	-0.080095	-0.042511	-0.22806	-0.29681	-0.32833	-0.26751	-0.25569	-0.25923	-0.067071	-0.22375	-0.30765	-0.24972	-0.15059	-0.079622	0.039644
Pyroglutamine	-0.22607	0.087605	0.17731	-0.12275	-0.11298	-0.17101	-0.10083	0.014122	0.28237	0.012659	0.24089	-0.11419	-0.11743	0.22885	-0.0073697	0.17585	0.086047	0.070351	0.043917	0.13432	-0.051687	-0.40896	-0.25976	-0.38803	-0.18616	-0.071842	-0.075978	-0.18551	-0.038697	-0.06385	0.3665	0.14873	0.094266	0.083272	-0.0074422	-0.13633	-0.070697	-0.1558	-0.30945	-0.21907	-0.15746	0.23499	0.23576	-0.23396	-0.32245	-0.00022378	-0.259	-0.09023	-0.18933
C17-carnitine	-0.32223	0.12281	0.28934	-0.15207	-0.21049	-0.28737	-0.10309	-0.30948	0.48001	0.32263	0.34955	0.047008	-0.20304	0.12521	-0.025479	0.13712	0.060865	0.071569	0.05099	0.21137	-0.032327	-0.5184	-0.31017	-0.52786	-0.39854	-0.2037	-0.17601	-0.25777	-0.20338	-0.096749	0.14667	0.123	-0.075571	-0.062665	-0.15511	-0.21889	-0.25786	-0.45606	-0.38446	-0.42663	-0.34547	-0.071588	-0.086369	-0.28996	-0.51879	-0.32166	-0.28866	-0.099147	-0.081018
L-Alanine	-0.1412	-0.074997	-0.11476	-0.003034	0.0095019	0.056517	0.067165	0.004528	0.28993	0.28509	0.42957	-0.046396	0.26524	0.13307	-0.084819	0.17906	0.25561	0.23625	0.21631	0.25186	0.047319	0.099714	0.24692	0.11715	0.20789	0.079845	0.03362	0.12449	0.44707	0.24177	0.37224	0.41171	0.36173	0.52402	0.24418	0.045631	0.20897	0.10098	0.17584	0.17333	0.17064	-0.097223	0.059746	-0.043556	0.050019	-0.11112	-0.25342	-0.23309	-0.43794
Serylvaline	-0.13656	-0.07311	0.0036288	0.16058	0.006859	0.083448	0.017572	-0.074452	0.22977	0.24269	0.35872	-0.11942	0.13949	0.14917	0.0012345	0.21906	0.22039	0.161	0.19227	0.19143	0.069464	0.11979	0.19932	0.059506	0.16202	0.083241	-0.058918	0.125	0.32225	0.21597	0.21324	0.2841	0.32795	0.51807	0.20321	0.12654	0.20278	0.062057	0.16373	0.15403	0.10655	-0.026443	0.19058	0.023318	0.038985	0.00058942	-0.29429	-0.10088	-0.24161
L-Threonine	-0.049627	-0.19048	0.031862	-0.32036	-0.36195	-0.51141	-0.27003	-0.096369	0.082343	0.054978	-0.02151	-0.050502	0.2969	-0.17525	-0.34762	-0.058191	0.022557	0.051184	0.042327	-0.087347	-0.13808	-0.16923	-0.057487	-0.12509	-0.030257	-0.073288	-0.25402	-0.0015529	0.055194	-0.062632	0.21528	0.15231	0.11531	0.16638	-0.011847	-0.26871	0.057576	0.020933	-0.12482	-0.07322	-0.044652	0.060439	0.21622	-0.004867	0.051099	0.067352	-0.10074	-0.1044	-0.26048
Homocitrulline	-0.34881	-0.12473	0.048351	-0.30661	-0.16137	-0.36031	-0.21559	-0.19779	0.37949	0.26315	0.58167	0.099481	0.1691	0.27162	0.17915	0.23161	0.26432	0.38557	0.33379	0.36402	0.15402	-0.19392	-0.10705	-0.098154	0.013283	0.021926	0.033134	0.16727	0.074516	0.15838	0.40508	0.41858	0.46369	0.003009	-0.019579	-0.061916	0.0081675	-0.073739	-0.049521	-0.091862	-0.065735	0.1916	0.11169	-0.072693	-0.23581	0.10664	-0.26638	-0.07425	-0.28652
Epinephrine	-0.22748	-0.25015	-0.13835	-0.36852	-0.40553	-0.31349	-0.21397	-0.21757	0.26698	0.22052	0.34436	-0.012428	0.25627	0.13652	-0.12197	0.14504	0.20771	0.14747	0.19366	0.40899	0.39328	0.0052965	0.22242	-0.066623	-0.037895	0.028184	0.023317	0.30875	0.09291	0.24122	0.35266	0.21803	0.36919	0.22346	0.048699	-0.0029269	0.18107	-0.06307	-0.023863	-0.015165	0.032026	0.45218	0.37911	-0.086935	-0.1096	0.067705	-0.1788	0.043655	-0.012134
Pantothenic acid	-0.30002	-0.28294	-0.15445	-0.44763	-0.46451	-0.40381	-0.30104	-0.29512	0.23131	0.23108	0.35476	-0.0043681	0.27987	0.11874	-0.14083	0.093347	0.16118	0.12704	0.17211	0.39211	0.37624	-0.070344	0.16656	-0.077388	-0.062079	-0.018947	-0.0095334	0.2697	0.035039	0.18681	0.28854	0.20027	0.36924	0.13678	-0.0012521	-0.030728	0.12261	-0.11213	-0.0843	-0.063213	-0.028501	0.42495	0.35988	-0.053296	-0.15208	0.05895	-0.18835	0.085273	-0.053235
Cytosine	0.23566	0.074242	0.13162	0.37871	0.38945	0.13415	0.18429	0.45501	-0.19713	-0.17754	-0.31541	-0.11427	0.091088	0.19353	0.093319	0.21731	0.12109	0.22961	0.2195	-0.15345	-0.078959	0.2058	0.1165	0.43425	0.35955	0.30252	0.21238	0.1108	0.2017	0.10126	0.083382	0.033263	0.10078	0.15667	0.18148	0.1156	0.16579	0.42527	0.301	0.33388	0.29064	-0.03816	0.28116	0.09262	0.29826	0.44944	-0.090537	-0.19923	-0.24922
Tiglylcarnitine	0.3201	0.14888	-0.14951	-0.0057407	0.071087	0.015694	0.26521	0.21019	0.26661	-0.050528	0.042603	-0.022965	0.25728	0.075272	-0.011168	-0.10578	0.12021	0.053444	0.0045155	0.20828	0.10747	0.4665	0.42208	0.4448	0.45235	0.3668	0.39058	0.42045	0.31848	0.17923	0.33499	0.066291	0.22424	0.15626	0.19668	0.12484	0.35958	0.3341	0.3934	0.3131	0.33284	0.27984	0.02949	-0.20094	0.10416	-0.047191	0.31807	0.2093	-0.050882
Alpha-ketoisovaler	0.026569	-0.094741	-0.085914	0.27427	0.25605	-0.036193	0.054543	0.065895	0.13222	0.045732	-0.0011759	-0.1544	0.060756	0.074392	0.030774	0.016438	0.1088	0.16478	0.089199	0.049724	-0.089822	0.31112	0.29574	0.35339	0.35098	0.33182	0.2524	0.27755	0.11279	0.11956	0.10763	0.038866	0.057646	-0.13182	0.06445	0.16971	0.096322	0.16172	0.25258	0.15497	0.18398	-0.0551	-0.058306	-0.13512	0.049949	0.043187	0.19818	0.018327	-0.21792
Uric acid	0.32321	0.10729	0.19934	0.18661	0.19396	0.11502	0.29343	0.052871	0.33376	0.21247	0.021059	-0.097861	0.051308	0.17515	0.16904	0.22713	0.35332	0.25725	0.19045	0.29726	0.13807	0.28861	0.35353	0.38897	0.34352	0.43847	0.32759	0.27165	0.32437	0.16207	0.2519	0.14061	0.21642	0.10562	0.16364	0.11111	0.35079	0.16401	0.36352	0.28974	0.27135	0.094255	0.17265	-0.21544	0.11823	-0.11778	0.18708	-0.32798	-0.32732
Pipecolic acid	-0.24954	-0.29378	0.10918	0.0094536	-0.14327	-0.2915	-0.19014	-0.33413	0.13196	0.25098	0.079632	-0.13036	-0.081885	-0.069618	-0.040581	0.13343	0.2198	0.21481	0.23829	0.24006	0.057596	-0.073988	0.12685	-0.079216	-0.16487	0.18121	-0.11084	0.071696	-0.10935	0.05416	-0.066481	0.011039	0.040488	-0.16793	-0.060953	-0.065409	-0.059594	-0.25461	-0.050435	-0.085717	-0.074136	-0.08337	0.20338	-0.023278	-0.095014	0.0047525	-0.17115	-0.10186	-0.11168
Pyroglutamic acid	-0.29647	-0.49251	-0.088381	-0.05131	-0.14174	-0.305	-0.21857	-0.27292	0.15709	0.33918	0.18613	0.018034	0.13267	-0.051145	-0.031617	0.18211	0.33127	0.32422	0.31947	0.34555	0.17405	0.099774	0.34531	-0.021727	-0.028824	0.31901	-0.0030436	0.24509	0.049116	0.22982	0.066514	0.15215	0.20397	-0.11373	0.02115	0.045225	0.046237	-0.09806	0.090176	0.070568	0.10605	-0.034859	0.17943	0.15741	0.064769	0.13943	-0.18386	-0.23226	-0.25015
Oxoglutaric acid	-0.034432	0.18113	0.33895	0.33415	0.3358	0.15501	0.18711	0.095527	0.21664	0.19085	0.094896	-0.32812	-0.31915	0.59009	0.47203	0.46386	0.43393	0.48249	0.46859	0.41138	0.32706	-0.089246	0.031757	0.26775	0.05762	0.25772	0.35058	0.036265	0.12339	0.19809	0.13779	0.17383	0.27369	0.045627	0.16365	0.21867	0.14361	0.014529	0.059893	0.10586	0.058288	0.18022	0.45269	-0.22649	-0.23224	0.108	-0.34449	-0.22569	-0.17646
Cholic acid	0.21362	0.46513	0.49864	0.35494	0.35623	0.14567	0.49092	0.20522	0.64611	0.37307	-0.012423	0.28596	-0.014638	0.3355	0.36249	0.41889	0.31989	0.24154	0.13019	0.21643	0.12686	0.069707	0.12307	0.013	0.1747	0.35933	0.36751	0.089504	0.17729	0.16943	0.29751	0.25872	0.071816	0.18324	0.31761	0.1698	0.21876	0.14079	0.23536	0.13774	0.24902	-0.00052441	-0.19704	0.053661	-0.038057	-0.20248	-0.17739	-0.27827	-0.17209
Hydroxyphenyllacti	0.038667	0.061531	0.37162	0.4129	0.28526	0.034618	0.20135	0.26999	0.13624	0.05294	-0.19915	-0.12054	-0.10376	-0.024459	0.23401	0.25341	0.32424	0.36667	0.30964	0.081562	-0.023245	0.22725	0.14503	0.09438	0.099575	0.46889	0.21091	0.12658	0.046645	0.16694	0.12907	0.033212	0.029883	0.0028044	0.30881	0.27977	0.25333	0.13979	0.24457	0.17823	0.22781	0.12096	0.18066	0.051268	0.068564	0.11688	-0.065903	-0.075551	-0.076046
Gamma-Glutamyl Glu	-0.42048	-0.40676	-0.45259	-0.10916	-0.17611	-0.32424	-0.38088	-0.21108	-0.037001	-0.093788	-0.12013	0.27924	0.33403	-0.32082	-0.27261	-0.38633	-0.23955	-0.21758	-0.29237	-0.24666	-0.31799	0.035293	-0.034614	-0.11298	-0.11119	0.038677	-0.10493	-0.11708	-0.25082	-0.22024	-0.30402	-0.33987	-0.20662	-0.28876	-0.19572	0.0062683	-0.23906	-0.13433	0.047566	-0.071475	-0.08039	-0.46285	-0.41607	0.20573	-0.17163	-0.17892	0.13966	0.27152	-0.066285
N-Acetyl-L-asparti	-0.1709	0.078596	-0.051653	-0.29882	-0.17356	-0.14657	-0.014224	0.036635	0.39812	0.20133	0.29592	0.69797	0.60679	0.079616	-0.040243	-0.031515	-0.023092	-0.060238	-0.1316	0.16566	0.087202	-0.018053	0.050133	-0.075525	0.21018	0.12467	0.22626	0.076976	0.14397	0.049844	0.18074	0.14455	0.19708	0.074845	0.071905	0.21034	0.096409	0.13135	0.18534	0.1305	0.1335	0.031345	-0.23944	0.28325	-0.054912	-0.10066	0.068547	-0.031108	-0.39945
Propionylcarnitine	-0.25585	-0.063074	-0.095618	-0.11	-0.092317	-0.30919	-0.21	-0.10591	0.085494	-0.042387	-0.0026719	0.11006	0.17203	-0.019721	0.087768	-0.21659	-0.036725	-0.016059	-0.010222	0.086435	0.084657	0.037362	0.013873	0.25633	0.14719	0.14983	0.11644	0.24234	-0.1027	-0.0041084	-0.14946	-0.0017328	0.13018	-0.26046	0.08142	0.1649	0.025997	0.080661	0.048021	0.043847	0.015102	0.15023	-0.0063393	0.22416	-0.0029948	0.15466	-0.0051665	0.49877	0.095222
Adenosine monophos	0.0062159	0.037163	0.21073	0.10287	-0.031668	-0.18773	-0.12156	-0.02513	-0.17577	-0.27643	-0.33664	-0.40463	-0.057523	-0.028	-0.1078	-0.048512	-0.069788	-0.005306	0.035516	-0.11455	-0.15961	-0.084765	-0.059676	0.17372	0.05016	0.024376	-0.043996	-0.04638	-0.14004	-0.15527	-0.20108	-0.1386	-0.053811	-0.035321	0.15981	0.14057	0.068513	0.0038858	-0.098582	0.008449	-0.026557	0.10156	0.38481	0.025009	-0.071265	0.035892	0.070721	0.40905	0.069897
NAD	0.26552	0.12406	0.22681	0.06026	0.0074662	0.024587	0.078128	0.051607	-0.021214	-0.26564	-0.21117	-0.25459	0.021228	-0.12581	-0.086132	-0.02571	-0.01537	-0.066455	-0.059749	-0.059141	-0.15283	0.10026	0.071868	0.16684	0.18734	0.088997	0.017043	0.096569	0.051766	-0.083449	0.040666	-0.0006652	-0.013001	0.064296	0.21327	0.14105	0.24402	0.10255	0.045243	0.10516	0.11204	0.22152	0.26477	-0.048903	0.13536	-0.091624	0.36198	0.23072	0.033265
Adenosine	0.0021372	-0.18666	0.014936	0.0065302	-0.059349	-0.29187	-0.15872	-0.18422	0.070378	-0.25218	-0.095772	-0.2091	0.14103	-0.136	-0.11629	-0.061154	0.0074044	0.060814	0.024161	-0.023152	-0.32408	0.10473	0.080216	0.20027	0.17384	0.1902	-0.057744	0.1798	-0.051634	-0.13391	-0.023779	-0.046663	0.052571	-0.048009	0.11114	0.073958	0.098742	0.0051176	0.1151	0.083694	0.084922	-0.12046	0.0987	-0.0039493	-0.0039078	-0.055508	0.28812	0.33137	0.0042589
Inosinic acid	-0.13417	-0.080756	0.10395	0.10977	-0.070137	-0.21617	-0.10571	-0.16137	0.008135	0.11569	-0.15581	-0.05045	0.10301	-0.03554	-0.13279	0.012774	0.035479	0.040689	0.082556	0.0072235	-0.047771	0.023386	0.13679	0.11031	0.095504	0.12648	-0.080065	0.045046	-0.007005	0.013648	-0.28095	-0.0053345	0.020784	0.034207	0.18153	0.11864	0.013438	0.016541	0.057184	0.095235	0.056302	-0.16421	0.10926	0.32083	0.040142	0.030216	-0.14864	0.23235	-0.063076
Phenylalanyl-Gluta	0.20258	0.0083075	0.023764	0.072348	-0.038624	-0.21419	0.0016721	-0.027537	0.038436	-0.051893	-0.33845	-0.17318	0.091346	-0.056898	-0.23892	-0.10975	-0.14623	-0.15786	-0.23459	-0.17782	-0.20905	0.1215	0.14872	0.076678	0.14972	0.18341	0.11618	-0.002596	-0.13546	-0.19165	0.0033435	-0.34357	-0.2025	-0.14777	-0.11897	-0.033489	0.0311	-0.015921	0.068509	-0.0094262	0.029219	-0.013745	-0.019382	-0.23867	-0.14186	-0.19191	0.3454	0.028683	-0.162
L-Tryptophan	-0.04072	0.059708	0.2376	0.077456	0.00065163	-0.18232	0.0064347	-0.27906	0.52381	0.19841	0.027292	-0.031037	-0.2118	0.13717	0.15433	0.11694	0.22484	0.099363	0.03105	0.23613	-0.0019893	-0.1365	-0.043483	-0.062873	-0.087245	0.21105	0.048229	0.036072	-0.073938	-0.071248	0.036902	0.030219	-0.013545	-0.21172	-0.0086637	-0.083864	-0.007607	-0.21644	-0.025579	-0.10303	-0.071661	-0.036958	-0.028355	-0.21731	-0.26037	-0.28435	0.037284	-0.029711	-0.0088401
Pivaloylcarnitine	0.071793	0.31375	-0.050591	-0.11017	-0.082336	-0.21605	0.11841	-0.18273	0.4016	0.11415	-0.0082382	-0.08278	-0.12715	-0.028601	-0.074295	-0.38224	-0.11656	-0.18981	-0.24936	0.10009	-0.040056	-0.035506	-0.0028114	0.12211	-0.031664	0.019295	0.16345	-0.0090089	-0.11144	-0.18245	-0.014749	-0.18909	-0.18448	-0.25812	-0.15268	-0.22335	-0.093384	-0.20384	-0.065578	-0.20355	-0.16936	-0.046663	-0.3457	-0.49498	-0.39839	-0.52918	0.20182	0.35842	0.11091
Isovalerylcarnitin	0.22064	0.32334	-0.014765	0.024894	0.04298	-0.080419	0.21484	-0.028973	0.33307	-0.059564	-0.11216	-0.16925	-0.13053	-0.035606	-0.026545	-0.3215	-0.081384	-0.15846	-0.21947	0.066564	-0.089467	0.085348	0.059067	0.23907	0.056115	0.13951	0.23735	0.045288	-0.054576	-0.17388	0.062174	-0.23066	-0.17954	-0.17438	-0.079022	-0.13542	0.032434	-0.097215	0.050425	-0.080942	-0.050798	0.0053705	-0.21782	-0.54282	-0.2921	-0.44668	0.31149	0.31699	0.12501
Isobutyryl-L-carni	0.051981	0.24906	-0.043089	-0.016639	-0.009895	-0.13796	0.10358	-0.10549	0.35516	-0.055997	-0.030504	-0.206	-0.18382	-0.076182	-0.07102	-0.35963	-0.086571	-0.16863	-0.2242	0.080001	-0.14635	-0.04291	-0.03581	0.15501	-0.057402	0.058864	0.13506	-0.011938	-0.11069	-0.21441	0.044408	-0.21717	-0.21682	-0.22257	-0.14077	-0.18858	-0.061686	-0.20296	-0.068356	-0.19409	-0.16352	-0.054752	-0.20909	-0.60575	-0.34686	-0.46919	0.24798	0.30787	0.11589
Phosphorylcholine	0.089273	-0.057179	-0.11872	-0.22918	-0.23955	-0.088719	-0.12881	-0.10108	0.059159	-0.041823	0.1185	0.01719	0.26227	-0.11678	-0.21951	-0.14088	-0.08792	-0.17822	-0.13794	-0.046656	0.0036102	0.12473	0.061093	0.20396	0.24689	-0.15349	-0.14965	0.30918	0.17155	0.035998	0.10017	0.17118	0.14574	0.22731	0.049618	-0.024937	0.1753	0.15809	0.071738	0.053362	0.023262	0.19477	0.068252	-0.028648	0.27833	0.036216	0.24062	0.12736	0.082652
2-Methylguanosine	-0.012238	-0.2779	-0.21841	-0.23652	-0.15478	-0.23196	-0.20442	0.00057508	-0.16917	-0.23737	0.060909	-0.047294	0.47361	-0.11565	-0.27478	-0.095814	-0.086442	0.038365	0.017458	-0.023698	-0.18806	0.22045	0.23068	0.27648	0.40024	0.086489	0.032357	0.29515	0.12964	0.026138	0.095191	0.083199	0.20827	0.072058	0.14388	0.21246	0.17101	0.23744	0.16974	0.21129	0.20403	0.069392	0.13599	0.17486	0.2104	0.16188	0.3609	0.22355	-0.21309
3, 5-Tetradecadien	0.16062	-0.014567	-0.24468	-0.1182	0.082634	0.26327	0.13847	0.27407	0.021114	-0.094075	0.47692	0.18781	0.42326	0.046085	0.098566	-0.019246	0.12521	0.12379	0.15165	0.21598	0.20924	0.36025	0.25047	0.38594	0.38839	0.13835	0.24975	0.35505	0.45704	0.28515	0.45643	0.30705	0.4551	0.29538	0.017745	0.11889	0.31746	0.36509	0.38092	0.33199	0.25618	0.28905	0.19422	-0.12468	0.31183	0.26862	0.16861	-0.12877	-0.29358
D-Maltose	0.010798	-0.10868	-0.12022	-0.52659	-0.31965	0.053108	-0.10807	-0.045288	-0.31622	0.044002	0.32553	0.213	0.39717	-0.13476	-0.16303	-0.039893	-0.13511	-0.052891	-0.040006	0.074128	0.15253	0.09787	0.070575	-0.016437	0.16206	-0.16768	0.033756	0.090898	0.075063	0.055375	0.11291	0.018996	0.20992	-0.020664	-0.14311	0.085697	0.096377	0.018434	0.075648	0.051098	-0.0034158	0.30518	0.071683	0.047457	0.11447	0.012213	0.36476	-0.16034	-0.29637
Methionyl-Phenylal	0.040304	0.13015	0.24395	-0.36723	-0.26438	0.1172	-0.017399	-0.041404	-0.0033216	-0.044045	0.33244	0.069998	0.1507	0.0051776	-0.0068747	0.20407	-0.010564	-0.03896	0.013032	0.10818	0.12412	-0.14352	-0.22026	-0.056579	-0.0058733	-0.20705	-0.10263	0.090686	0.034319	-0.031391	0.3458	0.10812	0.22775	0.24616	-0.09149	-0.10492	0.16471	-0.096826	-0.0064081	-0.079112	-0.11739	0.41955	0.32391	-0.28414	0.045572	0.0045999	0.13631	-0.22236	-0.079433
Glycerophosphochol	-0.095072	-0.16229	0.18978	0.21334	0.058801	-0.020351	-0.12555	-0.073194	0.072153	-0.29017	0.097601	-0.17468	-0.15697	-0.039036	0.076567	0.20169	0.15599	0.14222	0.2346	0.026765	-0.20976	-0.15437	-0.15355	-0.094772	-0.13543	-0.022512	-0.34479	0.057661	0.019971	0.013639	0.038987	0.2511	0.092663	0.25539	0.1715	0.0089346	0.020075	-0.015618	-0.096219	0.0039055	-0.0032593	-0.10619	0.35012	0.11708	0.16854	0.28968	-0.2199	0.12514	0.25497
Adenylsuccinic aci	-0.16758	-0.24652	0.069355	0.28337	0.16184	0.13944	0.0068823	0.15683	0.063115	0.017637	0.23646	0.010982	0.032137	-0.0099981	0.17868	0.29447	0.40563	0.40292	0.49866	0.23739	0.10496	0.15409	0.17912	0.10034	0.067559	0.18685	-0.12994	0.27671	0.34674	0.39937	0.10812	0.48951	0.31763	0.4455	0.42756	0.28844	0.23892	0.25761	0.17837	0.28402	0.25916	-0.023532	0.34317	0.40558	0.44207	0.48255	-0.42287	-0.087962	0.080701
Fructose 1,6-bisph	-0.21038	-0.38043	-0.062286	-0.18794	-0.21456	-0.09263	-0.34931	-0.040628	-0.2811	-0.37197	0.16674	0.096852	0.083761	-0.15987	-0.1113	0.07691	-0.0088138	0.069448	0.18346	-0.049036	-0.11393	-0.18978	-0.24089	-0.29939	-0.25996	-0.22359	-0.39825	-0.034217	-0.090804	0.015277	-0.025787	0.11368	0.089635	0.081887	-0.082282	-0.036106	-0.11853	-0.028736	-0.15446	-0.04957	-0.089594	0.011914	0.37186	0.22654	0.15086	0.44495	-0.077939	0.055459	0.20513
L-Lysine	-0.4697	-0.21205	-0.16698	-0.57727	-0.49898	-0.38405	-0.54225	-0.39073	-0.066483	-0.070529	0.42581	0.022633	0.19257	-0.034366	-0.27509	-0.15719	-0.23724	-0.14204	-0.10658	-0.057067	-0.12521	-0.48476	-0.46654	-0.32085	-0.2686	-0.49553	-0.3764	-0.21802	-0.21765	-0.23997	0.045158	0.018005	0.13179	-0.083207	-0.38632	-0.32177	-0.30144	-0.34215	-0.36409	-0.37434	-0.43911	0.029376	0.11326	-0.20585	-0.36901	-0.065701	-0.050619	0.1469	-0.16311
(R)-3-Hydroxybutyr	-0.32678	-0.36124	-0.18523	-0.32804	-0.3366	-0.21664	-0.3529	-0.18477	-0.071323	0.21977	0.42992	0.18091	0.33217	-0.23618	-0.31055	-0.078543	-0.021859	-0.001178	0.056425	0.003306	-0.027993	-0.11755	-0.002055	-0.2143	-0.0089927	-0.22699	-0.35693	0.027879	0.1631	0.113	0.083771	0.31739	0.19232	0.14335	-0.091929	-0.11213	-0.073538	-0.018327	-0.11828	-0.065083	-0.099242	-0.04611	0.049859	0.2176	0.21992	0.18607	-0.15662	-0.21076	-0.35824
4-Hydroxybutyric a	-0.3227	-0.35934	-0.18497	-0.32852	-0.33409	-0.21182	-0.34834	-0.17855	-0.069927	0.21632	0.43309	0.18347	0.33592	-0.23474	-0.30699	-0.077068	-0.017318	0.0018372	0.0596	0.008554	-0.024305	-0.11124	0.0021649	-0.2076	-0.0040818	-0.22349	-0.35199	0.035376	0.16843	0.11803	0.089015	0.32103	0.19727	0.14706	-0.089355	-0.10771	-0.067513	-0.011099	-0.11267	-0.06002	-0.094661	-0.040317	0.055471	0.21683	0.22725	0.19067	-0.1531	-0.21176	-0.35645
Fumaric acid	-0.16649	-0.14482	-0.072023	-0.26155	-0.17516	0.086727	-0.11587	-0.071318	0.34272	-0.030051	0.57599	0.17517	0.061825	0.1705	0.028987	0.20158	0.28884	0.19822	0.26409	0.38528	0.1762	-0.19991	-0.17121	-0.080174	-0.16366	-0.166	-0.1513	0.14355	0.25884	0.18197	0.3629	0.40282	0.31246	0.31387	-0.054165	-0.12846	0.053375	-0.056447	-0.0066805	-0.022933	-0.075601	0.10739	0.32856	-0.30906	-0.0024854	0.099085	-0.086415	-0.26846	0.038928
L-Malic acid	-0.34107	-0.34173	-0.24664	-0.32133	-0.22935	0.0037557	-0.24879	-0.22793	0.24966	0.030128	0.57357	0.20165	-0.036305	-0.010217	0.008388	0.052485	0.23716	0.19277	0.22804	0.33896	0.10512	-0.2062	-0.20242	-0.22609	-0.34609	-0.24626	-0.2518	0.064748	0.10152	0.14266	0.15669	0.30313	0.16115	0.079577	-0.15653	-0.14816	-0.1186	-0.21729	-0.10064	-0.15201	-0.18197	-0.10799	0.044374	-0.23306	-0.079015	-0.020893	-0.05985	-0.22148	0.1735
Uracil	-0.30387	-0.69896	-0.62298	-0.37385	-0.33843	-0.11088	-0.38671	-0.19075	-0.11095	-0.067745	0.30895	0.43078	0.40468	-0.46556	-0.33462	-0.22325	-0.058731	-0.094871	-0.10156	-0.037082	-0.14183	0.1996	0.13418	-0.27638	-0.11498	-0.10664	-0.31697	0.1725	0.048665	0.099589	-0.00099254	0.054565	0.0096733	-0.0073965	-0.15933	-0.028655	-0.095985	-0.023071	0.093621	0.01977	0.040616	-0.25722	-0.29722	0.26892	0.27583	0.077915	0.25098	-0.11261	0.071073
Pseudouridine	-0.43952	-0.79993	-0.624	-0.17977	-0.19143	-0.22126	-0.39197	-0.17789	0.0054683	0.15442	0.27259	0.32678	0.42483	-0.26921	-0.19555	-0.065234	0.18319	0.14299	0.12904	0.12264	0.040382	0.26098	0.34642	-0.060831	-0.010225	0.13809	-0.1721	0.30871	0.16507	0.27671	0.039328	0.21839	0.1965	0.033228	-0.008561	0.041416	-0.016433	0.09493	0.17084	0.14559	0.1762	-0.26593	-0.13794	0.42433	0.35049	0.26299	-0.12492	-0.19413	-0.11258
Guanine	0.1611	-0.088873	-0.10645	-0.13895	-0.08829	0.11914	0.071358	-0.017534	0.055154	-0.11912	0.12731	0.46939	0.2353	-0.46145	-0.16164	-0.16541	-0.15062	-0.21736	-0.25315	-0.16088	-0.33468	0.20841	0.029517	-0.19872	0.064505	-0.027328	-0.21329	0.10476	0.06365	-0.060409	0.015425	0.018262	-0.15771	0.064143	-0.0063688	-0.018776	0.0139	0.045347	0.18153	0.059743	0.10126	-0.28596	-0.50714	0.19617	0.33287	-0.13867	0.44264	-0.073796	0.13035
Guanosine	0.13143	-0.095493	-0.10101	-0.15269	-0.11939	0.14378	0.025041	-0.097729	0.015805	-0.12984	0.12892	0.41452	0.11309	-0.45575	-0.13297	-0.17353	-0.16581	-0.25676	-0.26998	-0.17218	-0.30236	0.12629	-0.066993	-0.2605	-0.062656	-0.13095	-0.29403	0.040503	-0.01132	-0.10023	-0.053123	-0.021184	-0.19619	0.016495	-0.095212	-0.097005	-0.056988	-0.050634	0.090295	-0.030153	-0.0050743	-0.28263	-0.47359	0.13133	0.2799	-0.16271	0.4042	-0.06779	0.23937
Glutathione	0.10069	-0.12138	-0.25308	-0.18804	-0.069157	0.16305	0.034845	0.21174	-0.038666	-0.20853	0.21903	0.39391	0.36692	-0.29281	-0.069343	-0.13373	-0.037677	-0.066871	-0.030205	-0.049244	-0.028654	0.21481	0.063767	0.016567	0.095235	-0.11861	-0.1148	0.22486	0.26299	0.16013	0.19769	0.27354	0.1213	0.36078	0.14123	0.091127	0.18267	0.28358	0.16846	0.1776	0.19236	0.0056731	-0.14738	0.25246	0.46868	0.18854	0.13231	-0.017453	0.18407
gamma-Glutamylcyst	-0.013999	-0.20818	-0.36116	-0.432	-0.21237	0.16328	-0.087342	0.03867	-0.11945	-0.20862	0.38843	0.39611	0.29799	-0.093488	-0.10311	-0.076146	-0.068788	-0.06675	-0.019101	0.13338	0.09035	0.053428	-0.00027184	-0.070349	-0.0068817	-0.23818	-0.075826	0.15366	0.15173	0.11672	0.12406	0.15988	0.14067	0.14872	-0.076943	0.04917	0.010023	0.091933	0.053552	0.07523	0.050083	0.048256	-0.053052	0.089554	0.21649	0.13532	0.24988	-0.07444	0.15131
Phosphoenolpyruvic	-0.20803	-0.26391	-0.38238	-0.20268	-0.19411	-0.015577	-0.28677	-0.056297	-0.34294	-0.30837	0.037958	0.099471	0.036997	-0.16845	-0.26206	-0.25317	-0.26767	-0.19856	-0.10702	-0.18075	-0.095771	-0.15127	-0.24031	-0.13055	-0.32224	-0.36494	-0.25828	-0.16601	-0.21371	-0.12699	-0.21957	-0.24916	-0.19562	-0.086258	-0.37999	-0.1993	-0.3258	-0.15892	-0.15353	-0.18576	-0.25002	-0.22793	0.00073163	-0.14433	-0.093246	0.1247	0.037285	0.10259	0.26358
2-Hydroxypyridine	-0.049862	-0.35003	-0.14954	-0.27186	-0.31104	-0.090463	-0.2526	-0.20758	-0.2417	-0.030453	-0.030181	0.27279	0.1891	-0.3793	-0.25662	-0.10288	-0.16046	-0.21054	-0.14073	-0.17359	-0.033334	-0.14111	-0.092148	-0.28747	-0.32054	-0.24536	-0.35591	-0.13489	-0.14942	-0.12052	-0.13293	-0.11483	-0.15561	-0.020657	-0.30896	-0.24875	-0.15163	-0.18601	-0.13244	-0.13207	-0.14277	-0.19076	-0.011805	0.1337	0.19577	0.055525	0.025506	-0.30359	0.024167
Cytidine	-0.18527	-0.36112	-0.35377	-0.50662	-0.41389	-0.10856	-0.39106	-0.36363	-0.18058	-0.13258	0.21734	0.23819	-0.023465	-0.39321	-0.34905	-0.32677	-0.28537	-0.32896	-0.31113	-0.16352	-0.22936	-0.26322	-0.33082	-0.43475	-0.40015	-0.45857	-0.46283	-0.19343	-0.25397	-0.25637	-0.17127	-0.18282	-0.2775	-0.35226	-0.54691	-0.42401	-0.41095	-0.37638	-0.28859	-0.36624	-0.38849	-0.24908	-0.2888	-0.21773	-0.063889	-0.17043	0.37042	-0.14916	0.1513
Xanthosine	-0.24635	-0.4025	-0.36293	-0.40065	-0.27003	-0.20096	-0.30522	-0.11297	-0.15305	0.16185	0.21434	0.33042	0.15964	-0.2053	-0.13491	-0.1296	-0.026732	0.01247	0.023226	-0.013186	0.14404	-0.079248	-0.079498	-0.22253	-0.24461	-0.17257	-0.18051	0.012936	-0.072679	0.071492	0.048799	0.038932	0.023931	-0.23553	-0.37377	-0.32585	-0.2273	-0.099802	-0.094512	-0.15575	-0.14615	-0.03511	-0.14633	0.021418	0.090642	0.2125	-0.097611	-0.33607	-0.074976
Leucyl-Serine	0.16156	0.31862	0.25192	0.24596	0.2687	0.31684	0.19303	0.18278	-0.33349	-0.17131	-0.21858	-0.018127	-0.39794	-0.11388	0.21867	-0.040627	-0.20779	-0.15148	-0.1185	-0.3403	-0.16413	-0.12511	-0.3595	-0.11086	-0.18358	-0.17518	-0.12539	-0.29777	-0.22623	-0.19225	-0.23766	-0.21019	-0.30073	-0.1713	-0.15203	-0.15201	-0.2123	-0.069587	-0.12212	-0.14655	-0.17562	-0.14245	-0.20101	-0.010002	0.056419	0.080842	-0.071726	-0.032893	0.23981
Fructose 6-phospha	-0.15989	-0.19335	-0.081808	-0.075134	-0.089472	-0.045026	-0.24607	0.0074513	-0.46426	-0.34014	-0.16973	-0.011792	-0.22748	-0.19826	-0.079147	-0.1163	-0.19211	-0.080145	0.027794	-0.22041	-0.092394	-0.21546	-0.31288	-0.21606	-0.36987	-0.30805	-0.32021	-0.15598	-0.32729	-0.099921	-0.33091	-0.16822	-0.24654	-0.23149	-0.18738	-0.12742	-0.31601	-0.1188	-0.27867	-0.20437	-0.21835	-0.084586	0.086238	0.13494	0.056159	0.33721	-0.090566	0.18434	0.46729
6-Phosphogluconic	-0.080057	0.089648	0.080338	-0.030658	-0.050017	0.09679	-0.053301	0.045533	-0.33606	-0.19053	-0.14808	0.055816	-0.25759	-0.075549	0.020601	-0.054128	-0.17414	-0.091067	0.015889	-0.1647	0.030705	-0.25166	-0.3702	-0.19789	-0.40152	-0.34454	-0.21134	-0.25944	-0.29518	-0.10458	-0.32121	-0.20397	-0.24637	-0.094478	-0.17757	-0.12164	-0.26916	-0.16708	-0.22734	-0.21466	-0.25646	-0.081493	0.035776	0.015226	-0.0925	0.13064	-0.17957	0.12322	0.44717
Threoninyl-Leucine	0.45098	0.48743	0.51603	0.34332	0.39147	0.53914	0.44074	0.35562	-0.21879	-0.0099161	-0.085038	-0.11703	-0.29036	0.27438	0.44297	0.38156	0.079795	0.064608	0.12839	-0.019511	0.24141	0.081197	-0.0017006	0.12605	0.24056	0.038585	0.16474	0.030608	0.15923	0.15157	0.082888	0.1916	0.12992	0.18056	0.24279	0.20589	0.23227	0.27338	0.054624	0.18841	0.16478	0.42015	0.26664	0.19157	0.34019	0.32145	-0.11239	-0.19045	0.038867
Serylleucine	0.20555	0.29897	0.23307	0.2272	0.38091	0.50568	0.3898	0.52096	-0.18937	-0.00052587	0.095576	0.28972	-0.035878	0.17258	0.42456	0.2674	0.12969	0.17687	0.24158	0.11433	0.33298	0.15183	0.065231	0.14807	0.17914	0.15171	0.29236	0.11413	0.2075	0.29795	0.13979	0.21313	0.15839	0.10671	0.17635	0.26958	0.16587	0.34391	0.19349	0.26036	0.23948	0.29483	0.12972	0.27354	0.38652	0.50283	-0.19903	-0.27217	-0.031587
Leucyl-Arginine	0.065963	0.50022	0.31141	0.19046	0.16803	0.037178	0.17165	0.14172	-0.25645	-0.031473	-0.3938	-0.0013673	-0.20043	-0.13523	0.11336	-0.22079	-0.3342	-0.22142	-0.23511	-0.43203	-0.18687	-0.12106	-0.33583	-0.065465	-0.091699	-0.11181	0.011527	-0.39298	-0.32097	-0.28692	-0.35569	-0.33869	-0.31525	-0.24817	-0.054267	-0.084672	-0.19483	-0.073851	-0.10793	-0.16329	-0.18282	-0.11718	-0.34344	0.11931	-0.19746	-0.15911	-0.12009	0.34696	0.084138
Serinyl-Phenylalan	0.287	0.4698	0.53071	0.51229	0.49268	0.37236	0.3783	0.28452	-0.17184	-0.098915	-0.34234	-0.13054	-0.4215	0.043177	0.51236	0.18917	0.022879	0.045398	0.059774	-0.21462	-0.013888	0.035697	-0.1763	0.11494	0.043271	0.11441	0.088921	-0.095709	-0.094151	-0.039099	-0.14224	-0.0023272	-0.10211	-0.058015	0.22115	0.11452	0.083447	0.1324	0.029497	0.063818	0.069073	0.087759	-0.028598	0.22326	0.20998	0.16722	-0.19197	0.069917	0.23267
Diethanolamine	0.11	0.09183	-0.14589	-0.019186	0.049559	0.20942	0.023212	-0.097824	-0.11649	-0.10433	-0.025611	-0.048115	0.050619	0.13035	0.071223	-0.076982	-0.17462	-0.22989	-0.25497	-0.11022	-0.046307	0.070553	0.01145	0.15738	0.22898	-0.14813	0.02867	-0.020775	0.076364	-0.11003	-0.18789	-0.019367	0.060447	0.10828	0.11786	0.18241	0.064657	0.094332	0.027724	0.11119	0.049672	-0.061766	-0.18441	0.21604	0.055191	-0.18298	0.1884	0.20766	0.064511
Hydroxyhexanoycarn	-0.20166	-0.033412	-0.12148	-0.030006	-0.068385	0.024479	-0.11232	-0.015888	0.19318	-0.33049	0.10631	0.25031	0.027567	-0.23784	-0.16776	-0.1878	-0.10298	-0.14378	-0.1304	-0.1707	-0.42048	-0.19798	-0.35425	-0.301	-0.25934	-0.29682	-0.38245	-0.17711	0.00080282	-0.13338	-0.10071	0.12734	-0.17482	0.24286	0.12052	-0.04617	-0.15655	-0.062753	-0.10939	-0.11182	-0.10277	-0.43934	-0.2946	0.11676	-0.029007	-0.18767	0.01582	0.31533	0.37855
Hydroxyvalerylcarn	-0.050408	0.17395	0.15992	0.11025	0.046577	0.12854	-0.0050858	0.040932	-0.0077061	-0.28219	-0.12731	0.08216	-0.16179	-0.049618	-0.083935	-0.010938	-0.15519	-0.17434	-0.13468	-0.26082	-0.34586	-0.32814	-0.40891	-0.28687	-0.23217	-0.33078	-0.33619	-0.33313	-0.084632	-0.20158	-0.23154	0.036759	-0.24363	0.18882	0.12301	-0.040823	-0.19087	-0.06539	-0.22278	-0.12875	-0.13782	-0.34345	-0.1201	0.18022	-0.030962	-0.10522	-0.098213	0.19185	0.29078
[truncated: 141 more columns]

## Sheet: P value
	Acetylcholine	Dihydrouracil	(S)-Homostachydrin	2-Ethylhydracrylic	2-Hydroxy-2-methyl	5-Hydroxyhexanoic	Uridine	Isoleucyl-Alanine	Glycocholic acid	L-Kynurenine	LysoPC(15:0)	N-Acetylaspartylgl	Phosphocreatine	Symmetric dimethyl	Phenylalanyl-Serin	Proline betaine	N-Acetylglutamic a	cis-Aconitic acid	Citric acid	Tartaric acid	N-Acetyl-L-methion	4-Pyridoxic acid	thymine	Thymidine	1-Methylguanosine	5-Hydroxy-L-trypto	O-Adipoylcarnitine	Hippuric acid	Urocanic acid	Gluconic acid	4-Guanidinobutanoi	Cortisol	N6-Acetyl-L-lysine	Phenol sulphate	Phenylacetylglycin	p-Cresol sulfate	Indoxyl sulfate	1-Methyladenosine	Allantoin	Creatinine	1-Methylguanine	N-a-Acetyl-L-argin	2-Hydroxyglutarate	Tryptophyl-Leucine	Indolelactic acid	L-gamma-glutamyl-L	6-Phosphonoglucono	L-Acetylcarnitine	3-Hydroxyisovalery
Acetylcholine	NA	0.0011962	0.006155	0.05516	0.024842	0.0027239	5.56e-05	0.014466	0.71648	0.39956	0.13067	0.49029	0.74148	0.28019	0.13373	0.10795	0.69489	0.90361	0.93838	0.82231	0.75087	0.045024	0.20302	0.029714	0.0056294	0.1589	0.061203	0.38493	0.10933	0.73062	0.24716	0.92659	0.7001	0.080841	0.17808	0.281	0.011334	0.021442	0.048793	0.031669	0.043386	0.11375	0.24618	0.70017	0.038029	0.66892	0.054637	0.16861	0.8447
Dihydrouracil	0.0011962	NA	2.67e-05	0.073851	0.021009	0.026128	3.09e-05	0.03716	0.39603	0.77526	0.45207	0.61842	0.2177	0.034714	0.046585	0.14762	0.99979	0.94841	0.96185	0.9709	0.68879	0.92382	0.65645	0.17916	0.13388	0.60638	0.039098	0.6439	0.56404	0.79493	0.32667	0.94005	0.9685	0.26286	0.32228	0.69649	0.28634	0.38407	0.55137	0.62869	0.63235	0.25303	0.8926	0.19149	0.76564	0.46704	0.89534	0.61177	0.61953
(S)-Homostachydrin	0.006155	2.67e-05	NA	0.072245	0.080409	0.10272	0.0030295	0.12145	0.66081	0.49319	0.37048	0.43359	0.16973	0.13667	0.024994	0.0039754	0.36091	0.28821	0.29915	0.86432	0.61625	0.79802	0.58355	0.49264	0.25558	0.40193	0.28983	0.93275	0.68347	0.91572	0.32293	0.51999	0.69479	0.23184	0.148	0.4711	0.11133	0.48268	0.61074	0.58444	0.57647	0.082785	0.13255	0.75122	0.52686	0.77559	0.6299	0.086173	0.51968
2-Ethylhydracrylic	0.05516	0.073851	0.072245	NA	5.47e-10	0.00021619	0.00054604	0.0053166	0.559	0.96499	0.24012	0.18828	0.099798	0.011855	0.0003716	0.0061733	0.021707	0.036545	0.04549	0.50239	0.4104	0.026742	0.082736	0.0044262	0.031017	0.0042809	0.014128	0.28481	0.047387	0.069163	0.65053	0.20508	0.36909	0.083092	0.0021208	0.0089119	0.047433	0.012394	0.022266	0.0081043	0.009306	0.9587	0.29203	0.35134	0.10738	0.16353	0.17449	0.51655	0.88698
2-Hydroxy-2-methyl	0.024842	0.021009	0.080409	5.47e-10	NA	1.17e-05	4.64e-06	7.84e-05	0.33819	0.99806	0.80374	0.55338	0.34475	0.0014744	3.46e-06	0.0018944	0.0048023	0.0045539	0.0089872	0.13383	0.16579	0.0090849	0.031126	0.00011733	0.0018264	0.00040846	0.00011979	0.083729	0.0034153	0.013172	0.12211	0.030793	0.071221	0.052872	0.00045789	0.0023152	0.0099363	0.00054786	0.0026991	0.0006138	0.00060726	0.52111	0.27454	0.38372	0.041085	0.058199	0.21056	0.27565	0.55674
5-Hydroxyhexanoic	0.0027239	0.026128	0.10272	0.00021619	1.17e-05	NA	1.07e-05	0.0002921	0.71918	0.51521	0.77592	0.86422	0.46432	0.0090327	0.00059563	0.0017473	0.024711	0.086513	0.072082	0.13114	0.12042	0.011916	0.08353	0.0088228	0.0095823	0.032063	0.004904	0.14285	0.0018473	0.026646	0.11701	0.095663	0.10211	0.0038242	0.0042741	0.0015006	0.003203	0.0031552	0.0039068	0.00088716	0.003193	0.16747	0.078204	0.7214	0.021647	0.17197	0.84289	0.09167	0.98475
Uridine	5.56e-05	3.09e-05	0.0030295	0.00054604	4.64e-06	1.07e-05	NA	7.26e-06	0.11328	0.44014	0.93578	0.69523	0.99182	0.0053481	0.00015193	0.0010831	0.010248	0.018445	0.032638	0.052734	0.044498	0.0038344	0.012203	0.00049824	0.00017107	0.00062175	5.05e-06	0.040997	0.00047665	0.011386	0.0085727	0.037175	0.048813	0.0020441	0.00036311	0.004576	0.00014436	0.00028704	0.00028784	0.000334	0.00021115	0.077761	0.32878	0.73039	0.026579	0.28965	0.63643	0.050338	0.3191
Isoleucyl-Alanine	0.014466	0.03716	0.12145	0.0053166	7.84e-05	0.0002921	7.26e-06	NA	0.63628	0.82768	0.92182	0.37172	0.25316	0.059818	0.0031375	0.0075413	0.0074701	0.0032675	0.0047181	0.099855	0.063476	0.0010085	0.011365	0.00052663	0.00027012	0.00014462	2.39e-05	0.018177	0.00012756	0.0016067	0.0030022	0.025299	0.015527	0.0012914	8.76e-05	0.00038198	6.14e-05	1.66e-07	6.13e-05	8.61e-06	8.1e-06	0.033061	0.063951	0.20879	0.0013235	0.0023632	0.44463	0.070334	0.20506
Glycocholic acid	0.71648	0.39603	0.66081	0.559	0.33819	0.71918	0.11328	0.63628	NA	0.082717	0.0032269	0.038974	0.39203	0.057488	0.04603	0.10795	0.0042567	0.040477	0.097983	0.00041298	0.13184	0.41503	0.20637	0.46973	0.30552	0.054545	0.068222	0.021123	0.021383	0.029709	0.0041949	0.00094481	0.028422	0.046743	0.037749	0.19125	0.094583	0.31173	0.092784	0.24951	0.11546	0.6956	0.57477	0.93447	0.96677	0.67267	0.24308	0.6312	0.89609
L-Kynurenine	0.39956	0.77526	0.49319	0.96499	0.99806	0.51521	0.44014	0.82768	0.082717	NA	0.26429	0.13998	0.23798	0.21205	0.40108	0.10441	0.080383	0.080517	0.1393	0.076534	0.0019919	0.49451	0.048504	0.6581	0.34093	0.1831	0.12057	0.29639	0.20798	0.032357	0.33658	0.078781	0.097711	0.57431	0.41496	0.7185	0.41181	0.68252	0.31772	0.56288	0.39669	0.51649	0.46351	0.17742	0.79018	0.99203	0.0026584	0.0084452	0.0046466
LysoPC(15:0)	0.13067	0.45207	0.37048	0.24012	0.80374	0.77592	0.93578	0.92182	0.0032269	0.26429	NA	0.052257	0.12815	0.20496	0.24538	0.24362	0.032719	0.041632	0.036583	6.23e-05	0.079235	0.66216	0.29704	0.95637	0.45385	0.42904	0.34973	0.024616	0.022828	0.014214	0.0011033	0.00030862	0.0011733	0.12322	0.4177	0.26957	0.29914	0.54099	0.33111	0.40734	0.36528	0.2156	0.59548	0.89049	0.79384	0.31125	0.3817	0.44497	0.32669
N-Acetylaspartylgl	0.49029	0.61842	0.43359	0.18828	0.55338	0.86422	0.69523	0.37172	0.038974	0.13998	0.052257	NA	3.05e-05	0.70425	0.8648	0.78722	0.36589	0.48536	0.64656	0.17086	0.2204	0.2032	0.21322	0.84002	0.3219	0.23434	0.26282	0.10135	0.11622	0.082136	0.1751	0.087955	0.15796	0.26571	0.34591	0.16946	0.27648	0.13104	0.037073	0.14574	0.096778	0.99846	0.11745	0.010851	0.15432	0.56675	0.90851	0.26826	0.26327
Phosphocreatine	0.74148	0.2177	0.16973	0.099798	0.34475	0.46432	0.99182	0.25316	0.39203	0.23798	0.12815	3.05e-05	NA	0.45626	0.47787	0.98177	0.44622	0.36331	0.49006	0.31507	0.26711	0.024258	0.015445	0.32875	0.026781	0.1197	0.18565	0.024156	0.025416	0.055059	0.064617	0.095714	0.025172	0.063268	0.20601	0.10423	0.04505	0.018173	0.00694	0.023731	0.018371	0.56599	0.68125	0.008519	0.030725	0.26752	0.8216	0.3172	0.014474
Symmetric dimethyl	0.28019	0.034714	0.13667	0.011855	0.0014744	0.0090327	0.0053481	0.059818	0.057488	0.21205	0.20496	0.70425	0.45626	NA	0.0001508	2.29e-05	0.0056012	0.0098979	0.011534	0.0031757	0.0021798	0.33215	0.10739	0.022775	0.01613	0.034511	0.0004268	0.10804	0.015234	0.011666	0.040004	0.016906	0.0035406	0.051571	0.026494	0.031416	0.068759	0.037841	0.091569	0.029508	0.037385	0.049656	0.041265	0.88332	0.86921	0.10814	0.036708	0.20227	0.34443
Phenylalanyl-Serin	0.13373	0.046585	0.024994	0.0003716	3.46e-06	0.00059563	0.00015193	0.0031375	0.04603	0.40108	0.24538	0.8648	0.47787	0.0001508	NA	2.05e-05	1.52e-05	5.73e-05	0.00011184	0.001161	0.0017544	0.018702	0.048088	0.0019893	0.0085394	0.00014359	8e-05	0.0053825	0.0025033	0.00052883	0.01289	0.00081023	0.00046355	0.043779	0.00018824	0.0010095	0.00081566	0.0020556	0.0024764	0.0010008	0.0010095	0.016646	0.058818	0.25309	0.061003	0.014648	0.056162	0.2275	0.86067
Proline betaine	0.10795	0.14762	0.0039754	0.0061733	0.0018944	0.0017473	0.0010831	0.0075413	0.10795	0.10441	0.24362	0.78722	0.98177	2.29e-05	2.05e-05	NA	1.56e-05	6.01e-05	8.14e-05	0.0023502	0.0013112	0.044887	0.022553	0.035618	0.0035753	0.0013159	0.002331	0.0079498	0.00081634	0.00022557	0.0028194	0.00044979	0.00019262	0.00094927	0.00018824	0.0014651	0.00027715	0.0028218	0.0036407	0.00086803	0.00070341	0.0066971	0.0036916	0.15531	0.025314	0.007691	0.054805	0.0013888	0.19766
N-Acetylglutamic a	0.69489	0.99979	0.36091	0.021707	0.0048023	0.024711	0.010248	0.0074701	0.0042567	0.080383	0.032719	0.36589	0.44622	0.0056012	1.52e-05	1.56e-05	NA	2.53e-11	3.53e-10	2.26e-07	7.83e-05	0.0020482	0.00058308	0.003406	0.013752	3.86e-06	0.00050932	2.9e-05	1.46e-06	2.18e-09	0.00056546	1.58e-07	8.08e-07	0.0013852	3.14e-06	0.00025073	1.41e-05	0.00053549	9.47e-05	3.87e-05	1.99e-05	0.029679	0.014013	0.11596	0.0090742	0.0065572	0.021337	0.0254	0.40328
cis-Aconitic acid	0.90361	0.94841	0.28821	0.036545	0.0045539	0.086513	0.018445	0.0032675	0.040477	0.080517	0.041632	0.48536	0.36331	0.0098979	5.73e-05	6.01e-05	2.53e-11	NA	0	6.69e-06	0.00040026	0.0060261	0.0020106	0.0020224	0.011989	1.27e-05	0.00035453	0.00026653	2.49e-05	3.53e-08	0.0012485	9.55e-07	1.52e-06	0.0070473	1.23e-05	0.00038596	0.0001548	0.00071899	0.00032137	0.00013249	8.01e-05	0.047426	0.016746	0.10065	0.022374	0.0018189	0.0085228	0.039942	0.16539
Citric acid	0.93838	0.96185	0.29915	0.04549	0.0089872	0.072082	0.032638	0.0047181	0.097983	0.1393	0.036583	0.64656	0.49006	0.011534	0.00011184	8.14e-05	3.53e-10	0	NA	5.43e-06	0.00016818	0.012264	0.0040113	0.00262	0.027965	0.00010656	0.0014247	0.00043107	5.88e-05	4.93e-08	0.0027202	2.48e-06	1.87e-06	0.0066459	5.51e-05	0.00073434	0.00031515	0.0015315	0.0011396	0.00027296	0.00031697	0.027423	0.0024588	0.13587	0.021746	0.00041311	0.0060113	0.055969	0.27431
Tartaric acid	0.82231	0.9709	0.86432	0.50239	0.13383	0.13114	0.052734	0.099855	0.00041298	0.076534	6.23e-05	0.17086	0.31507	0.0031757	0.001161	0.0023502	2.26e-07	6.69e-06	5.43e-06	NA	1.94e-05	0.037878	0.002287	0.026641	0.047182	0.0009922	0.0006903	5.23e-05	9.45e-05	1.04e-06	0.00022302	4.35e-06	1.84e-06	0.017252	0.0028213	0.0032039	0.0019882	0.024034	0.0057602	0.004381	0.0029973	0.013614	0.044274	0.57753	0.19222	0.045582	0.083764	0.1486	0.44521
N-Acetyl-L-methion	0.75087	0.68879	0.61625	0.4104	0.16579	0.12042	0.044498	0.063476	0.13184	0.0019919	0.079235	0.2204	0.26711	0.0021798	0.0017544	0.0013112	7.83e-05	0.00040026	0.00016818	1.94e-05	NA	0.016733	0.00077843	0.01185	0.034142	0.0026885	0.00015906	0.0012219	0.0016183	1.68e-06	0.013716	0.0022697	2.01e-05	0.055942	0.01732	0.016534	0.0021946	0.011252	0.0056219	0.0037145	0.0043022	0.00041682	0.023435	0.15898	0.092956	0.01133	0.0082306	0.027367	0.17841
4-Pyridoxic acid	0.045024	0.92382	0.79802	0.026742	0.0090849	0.011916	0.0038344	0.0010085	0.41503	0.49451	0.66216	0.2032	0.024258	0.33215	0.018702	0.044887	0.0020482	0.0060261	0.012264	0.037878	0.016733	NA	1.02e-08	6.87e-05	4.13e-06	1.05e-06	0.0002156	2.49e-06	1.87e-05	2.34e-05	0.028084	0.018583	0.0017115	0.004495	6.78e-05	2.2e-05	1.15e-06	1.33e-07	1.38e-10	5.16e-09	1.82e-09	0.083277	0.38667	0.010088	1.55e-05	0.016138	0.8876	0.26969	0.49971
thymine	0.20302	0.65645	0.58355	0.082736	0.031126	0.08353	0.012203	0.011365	0.20637	0.048504	0.29704	0.21322	0.015445	0.10739	0.048088	0.022553	0.00058308	0.0020106	0.0040113	0.002287	0.00077843	1.02e-08	NA	0.00018466	1.12e-05	6.56e-07	4.77e-05	3.01e-06	6.29e-06	9.93e-07	0.014371	0.0046397	0.00036381	0.010359	0.00044471	0.00025381	4.26e-05	1.34e-05	1.02e-06	4.8e-07	5.25e-08	0.087313	0.30505	0.013557	0.00034927	0.015641	0.41304	0.067093	0.076527
Thymidine	0.029714	0.17916	0.49264	0.0044262	0.00011733	0.0088228	0.00049824	0.00052663	0.46973	0.6581	0.95637	0.84002	0.32875	0.022775	0.0019893	0.035618	0.003406	0.0020224	0.00262	0.026641	0.01185	6.87e-05	0.00018466	NA	6.27e-06	6.37e-05	3.43e-06	0.00051915	0.00012071	0.0011895	0.057531	0.015876	0.0026291	0.02331	0.00027157	0.001149	9.52e-05	8.39e-06	2.12e-05	5.77e-06	2.16e-05	0.10727	0.083679	0.30857	0.0034756	0.025967	0.50313	0.44386	0.27005
1-Methylguanosine	0.0056294	0.13388	0.25558	0.031017	0.0018264	0.0095823	0.00017107	0.00027012	0.30552	0.34093	0.45385	0.3219	0.026781	0.01613	0.0085394	0.0035753	0.013752	0.011989	0.027965	0.047182	0.034142	4.13e-06	1.12e-05	6.27e-06	NA	1.99e-05	7.58e-06	6.41e-05	8.44e-06	0.00071092	0.00365	0.0051814	0.0003742	0.0022694	9.35e-05	7.51e-05	3.77e-06	1.22e-08	6.27e-07	1.32e-07	9.37e-08	0.027036	0.25021	0.037767	0.00017481	0.012467	0.97936	0.095373	0.028076
5-Hydroxy-L-trypto	0.1589	0.60638	0.40193	0.0042809	0.00040846	0.032063	0.00062175	0.00014462	0.054545	0.1831	0.42904	0.23434	0.1197	0.034511	0.00014359	0.0013159	3.86e-06	1.27e-05	0.00010656	0.0009922	0.0026885	1.05e-06	6.56e-07	6.37e-05	1.99e-05	NA	4.81e-07	6.35e-06	1.69e-05	2.38e-06	0.0018414	0.0015227	0.000121	0.014237	3.28e-06	3.21e-05	1.83e-06	1.01e-06	4.02e-08	3.93e-08	9.03e-10	0.034237	0.13387	0.022589	0.00076606	0.0021859	0.18767	0.087804	0.13265
O-Adipoylcarnitine	0.061203	0.039098	0.28983	0.014128	0.00011979	0.004904	5.05e-06	2.39e-05	0.068222	0.12057	0.34973	0.26282	0.18565	0.0004268	8e-05	0.002331	0.00050932	0.00035453	0.0014247	0.0006903	0.00015906	0.0002156	4.77e-05	3.43e-06	7.58e-06	4.81e-07	NA	0.00090247	4.62e-05	4.76e-05	0.0023303	0.0067749	0.00037887	0.022985	0.000227	0.00015231	6.83e-05	1.09e-05	5.9e-06	5.47e-06	2.41e-06	0.015073	0.20588	0.24265	0.044857	0.03673	0.21562	0.10894	0.054301
Hippuric acid	0.38493	0.6439	0.93275	0.28481	0.083729	0.14285	0.040997	0.018177	0.021123	0.29639	0.024616	0.10135	0.024156	0.10804	0.0053825	0.0079498	2.9e-05	0.00026653	0.00043107	5.23e-05	0.0012219	2.49e-06	3.01e-06	0.00051915	6.41e-05	6.35e-06	0.00090247	NA	1.32e-05	2.13e-07	0.0002651	2.78e-05	1.81e-06	0.00472	7.03e-05	0.00015231	2.22e-06	1.44e-05	3.32e-06	8.47e-06	9.2e-07	0.004709	0.11422	0.044472	9.6e-05	0.0013679	0.6123	0.27542	0.68246
Urocanic acid	0.10933	0.56404	0.68347	0.047387	0.0034153	0.0018473	0.00047665	0.00012756	0.021383	0.20798	0.022828	0.11622	0.025416	0.015234	0.0025033	0.00081634	1.46e-06	2.49e-05	5.88e-05	9.45e-05	0.0016183	1.87e-05	6.29e-06	0.00012071	8.44e-06	1.69e-05	4.62e-05	1.32e-05	NA	2.42e-08	4.39e-05	3.31e-07	5.85e-07	1.2e-06	1.63e-06	3.71e-05	6.17e-08	8.16e-08	6.87e-08	3.23e-09	6.38e-09	0.052477	0.068942	0.084418	0.00017337	0.011122	0.30281	0.01336	0.065807
Gluconic acid	0.73062	0.79493	0.91572	0.069163	0.013172	0.026646	0.011386	0.0016067	0.029709	0.032357	0.014214	0.082136	0.055059	0.011666	0.00052883	0.00022557	2.18e-09	3.53e-08	4.93e-08	1.04e-06	1.68e-06	2.34e-05	9.93e-07	0.0011895	0.00071092	2.38e-06	4.76e-05	2.13e-07	2.42e-08	NA	0.00045204	2.51e-07	3.59e-08	0.00062648	5.56e-06	1.52e-05	5.93e-06	7.19e-06	1.95e-06	7.04e-07	2.1e-07	0.012875	0.04989	0.015593	0.00085873	0.00048235	0.029238	0.029093	0.19243
4-Guanidinobutanoi	0.24716	0.32667	0.32293	0.65053	0.12211	0.11701	0.0085727	0.0030022	0.0041949	0.33658	0.0011033	0.1751	0.064617	0.040004	0.01289	0.0028194	0.00056546	0.0012485	0.0027202	0.00022302	0.013716	0.028084	0.014371	0.057531	0.00365	0.0018414	0.0023303	0.0002651	4.39e-05	0.00045204	NA	2.55e-05	1.07e-05	0.00060885	0.0068234	0.049989	0.00012112	0.0022193	0.0033947	0.0047187	0.0011541	0.00086304	0.057916	0.99874	0.032335	0.022957	0.35712	0.020371	0.066937
Cortisol	0.92659	0.94005	0.51999	0.20508	0.030793	0.095663	0.037175	0.025299	0.00094481	0.078781	0.00030862	0.087955	0.095714	0.016906	0.00081023	0.00044979	1.58e-07	9.55e-07	2.48e-06	4.35e-06	0.0022697	0.018583	0.0046397	0.015876	0.0051814	0.0015227	0.0067749	2.78e-05	3.31e-07	2.51e-07	2.55e-05	NA	6.28e-08	0.00046159	5.4e-05	0.0022507	0.00025987	0.0006985	0.0013423	0.00062081	0.00023082	0.066626	0.11654	0.082893	0.0052043	0.0090658	0.036829	0.043314	0.15934
N6-Acetyl-L-lysine	0.7001	0.9685	0.69479	0.36909	0.071221	0.10211	0.048813	0.015527	0.028422	0.097711	0.0011733	0.15796	0.025172	0.0035406	0.00046355	0.00019262	8.08e-07	1.52e-06	1.87e-06	1.84e-06	2.01e-05	0.0017115	0.00036381	0.0026291	0.0003742	0.000121	0.00037887	1.81e-06	5.85e-07	3.59e-08	1.07e-05	6.28e-08	NA	0.00066388	0.00021408	0.00068728	8.55e-06	8.33e-05	7.91e-05	2e-05	2.66e-05	0.000981	0.0086973	0.058659	0.0075428	0.0006053	0.057068	0.074281	0.071855
Phenol sulphate	0.080841	0.26286	0.23184	0.083092	0.052872	0.0038242	0.0020441	0.0012914	0.046743	0.57431	0.12322	0.26571	0.063268	0.051571	0.043779	0.00094927	0.0013852	0.0070473	0.0066459	0.017252	0.055942	0.004495	0.010359	0.02331	0.0022694	0.014237	0.022985	0.00472	1.2e-06	0.00062648	0.00060885	0.00046159	0.00066388	NA	1.3e-05	0.00094207	3.69e-06	0.0001617	0.00017611	8.33e-05	0.00011422	0.09933	0.053647	0.20157	0.0046592	0.10528	0.36144	0.057957	0.42898
Phenylacetylglycin	0.17808	0.32228	0.148	0.0021208	0.00045789	0.0042741	0.00036311	8.76e-05	0.037749	0.41496	0.4177	0.34591	0.20601	0.026494	0.00018824	0.00018824	3.14e-06	1.23e-05	5.51e-05	0.0028213	0.01732	6.78e-05	0.00044471	0.00027157	9.35e-05	3.28e-06	0.000227	7.03e-05	1.63e-06	5.56e-06	0.0068234	5.4e-05	0.00021408	1.3e-05	NA	3.35e-08	5.71e-08	6.32e-07	1.5e-06	1.16e-07	1.78e-08	0.083162	0.10713	0.008207	0.00048863	0.017245	0.17663	0.23108	0.61575
p-Cresol sulfate	0.281	0.69649	0.4711	0.0089119	0.0023152	0.0015006	0.004576	0.00038198	0.19125	0.7185	0.26957	0.16946	0.10423	0.031416	0.0010095	0.0014651	0.00025073	0.00038596	0.00073434	0.0032039	0.016534	2.2e-05	0.00025381	0.001149	7.51e-05	3.21e-05	0.00015231	0.00015231	3.71e-05	1.52e-05	0.049989	0.0022507	0.00068728	0.00094207	3.35e-08	NA	4.93e-06	3.01e-06	1.79e-06	7.63e-08	2.4e-07	0.08044	0.10394	0.0033335	0.001399	0.010012	0.70041	0.34897	0.62041
Indoxyl sulfate	0.011334	0.28634	0.11133	0.047433	0.0099363	0.003203	0.00014436	6.14e-05	0.094583	0.41181	0.29914	0.27648	0.04505	0.068759	0.00081566	0.00027715	1.41e-05	0.0001548	0.00031515	0.0019882	0.0021946	1.15e-06	4.26e-05	9.52e-05	3.77e-06	1.83e-06	6.83e-05	2.22e-06	6.17e-08	5.93e-06	0.00012112	0.00025987	8.55e-06	3.69e-06	5.71e-08	4.93e-06	NA	5.89e-08	9.11e-09	2.93e-09	2.51e-09	0.0010362	0.01391	0.066051	1.96e-05	0.0098965	0.72099	0.03798	0.28052
1-Methyladenosine	0.021442	0.38407	0.48268	0.012394	0.00054786	0.0031552	0.00028704	1.66e-07	0.31173	0.68252	0.54099	0.13104	0.018173	0.037841	0.0020556	0.0028218	0.00053549	0.00071899	0.0015315	0.024034	0.011252	1.33e-07	1.34e-05	8.39e-06	1.22e-08	1.01e-06	1.09e-05	1.44e-05	8.16e-08	7.19e-06	0.0022193	0.0006985	8.33e-05	0.0001617	6.32e-07	3.01e-06	5.89e-08	NA	2.6e-09	1.14e-12	1.33e-12	0.025507	0.08292	0.0050762	1.23e-06	0.00024802	0.53447	0.096132	0.17097
Allantoin	0.048793	0.55137	0.61074	0.022266	0.0026991	0.0039068	0.00028784	6.13e-05	0.092784	0.31772	0.33111	0.037073	0.00694	0.091569	0.0024764	0.0036407	9.47e-05	0.00032137	0.0011396	0.0057602	0.0056219	1.38e-10	1.02e-06	2.12e-05	6.27e-07	4.02e-08	5.9e-06	3.32e-06	6.87e-08	1.95e-06	0.0033947	0.0013423	7.91e-05	0.00017611	1.5e-06	1.79e-06	9.11e-09	2.6e-09	NA	8.28e-13	1.49e-12	0.079956	0.2643	0.010929	5.14e-05	0.015283	0.72957	0.082651	0.19292
Creatinine	0.031669	0.62869	0.58444	0.0081043	0.0006138	0.00088716	0.000334	8.61e-06	0.24951	0.56288	0.40734	0.14574	0.023731	0.029508	0.0010008	0.00086803	3.87e-05	0.00013249	0.00027296	0.004381	0.0037145	5.16e-09	4.8e-07	5.77e-06	1.32e-07	3.93e-08	5.47e-06	8.47e-06	3.23e-09	7.04e-07	0.0047187	0.00062081	2e-05	8.33e-05	1.16e-07	7.63e-08	2.93e-09	1.14e-12	8.28e-13	NA	0	0.042324	0.049613	0.0046363	6.35e-06	0.001153	0.58023	0.068593	0.18012
1-Methylguanine	0.043386	0.63235	0.57647	0.009306	0.00060726	0.003193	0.00021115	8.1e-06	0.11546	0.39669	0.36528	0.096778	0.018371	0.037385	0.0010095	0.00070341	1.99e-05	8.01e-05	0.00031697	0.0029973	0.0043022	1.82e-09	5.25e-08	2.16e-05	9.37e-08	9.03e-10	2.41e-06	9.2e-07	6.38e-09	2.1e-07	0.0011541	0.00023082	2.66e-05	0.00011422	1.78e-08	2.4e-07	2.51e-09	1.33e-12	1.49e-12	0	NA	0.042277	0.12224	0.003787	4.43e-06	0.0015953	0.48609	0.058304	0.17459
N-a-Acetyl-L-argin	0.11375	0.25303	0.082785	0.9587	0.52111	0.16747	0.077761	0.033061	0.6956	0.51649	0.2156	0.99846	0.56599	0.049656	0.016646	0.0066971	0.029679	0.047426	0.027423	0.013614	0.00041682	0.083277	0.087313	0.10727	0.027036	0.034237	0.015073	0.004709	0.052477	0.012875	0.00086304	0.066626	0.000981	0.09933	0.083162	0.08044	0.0010362	0.025507	0.079956	0.042324	0.042277	NA	0.00027793	0.8679	0.074212	0.0039239	0.63387	0.15715	0.51025
2-Hydroxyglutarate	0.24618	0.8926	0.13255	0.29203	0.27454	0.078204	0.32878	0.063951	0.57477	0.46351	0.59548	0.11745	0.68125	0.041265	0.058818	0.0036916	0.014013	0.016746	0.0024588	0.044274	0.023435	0.38667	0.30505	0.083679	0.25021	0.13387	0.20588	0.11422	0.068942	0.04989	0.057916	0.11654	0.0086973	0.053647	0.10713	0.10394	0.01391	0.08292	0.2643	0.049613	0.12224	0.00027793	NA	0.86287	0.12548	0.0011056	0.40896	0.17872	0.7487
Tryptophyl-Leucine	0.70017	0.19149	0.75122	0.35134	0.38372	0.7214	0.73039	0.20879	0.93447	0.17742	0.89049	0.010851	0.008519	0.88332	0.25309	0.15531	0.11596	0.10065	0.13587	0.57753	0.15898	0.010088	0.013557	0.30857	0.037767	0.022589	0.24265	0.044472	0.084418	0.015593	0.99874	0.082893	0.058659	0.20157	0.008207	0.0033335	0.066051	0.0050762	0.010929	0.0046363	0.003787	0.8679	0.86287	NA	0.0017926	0.016748	0.20347	0.45185	0.35028
Indolelactic acid	0.038029	0.76564	0.52686	0.10738	0.041085	0.021647	0.026579	0.0013235	0.96677	0.79018	0.79384	0.15432	0.030725	0.86921	0.061003	0.025314	0.0090742	0.022374	0.021746	0.19222	0.092956	1.55e-05	0.00034927	0.0034756	0.00017481	0.00076606	0.044857	9.6e-05	0.00017337	0.00085873	0.032335	0.0052043	0.0075428	0.0046592	0.00048863	0.001399	1.96e-05	1.23e-06	5.14e-05	6.35e-06	4.43e-06	0.074212	0.12548	0.0017926	NA	0.0004289	0.94817	0.021667	0.34773
L-gamma-glutamyl-L	0.66892	0.46704	0.77559	0.16353	0.058199	0.17197	0.28965	0.0023632	0.67267	0.99203	0.31125	0.56675	0.26752	0.10814	0.014648	0.007691	0.0065572	0.0018189	0.00041311	0.045582	0.01133	0.016138	0.015641	0.025967	0.012467	0.0021859	0.03673	0.0013679	0.011122	0.00048235	0.022957	0.0090658	0.0006053	0.10528	0.017245	0.010012	0.0098965	0.00024802	0.015283	0.001153	0.0015953	0.0039239	0.0011056	0.016748	0.0004289	NA	0.090847	0.15203	0.3739
6-Phosphonoglucono	0.054637	0.89534	0.6299	0.17449	0.21056	0.84289	0.63643	0.44463	0.24308	0.0026584	0.3817	0.90851	0.8216	0.036708	0.056162	0.054805	0.021337	0.0085228	0.0060113	0.083764	0.0082306	0.8876	0.41304	0.50313	0.97936	0.18767	0.21562	0.6123	0.30281	0.029238	0.35712	0.036829	0.057068	0.36144	0.17663	0.70041	0.72099	0.53447	0.72957	0.58023	0.48609	0.63387	0.40896	0.20347	0.94817	0.090847	NA	0.27786	0.18414
L-Acetylcarnitine	0.16861	0.61177	0.086173	0.51655	0.27565	0.09167	0.050338	0.070334	0.6312	0.0084452	0.44497	0.26826	0.3172	0.20227	0.2275	0.0013888	0.0254	0.039942	0.055969	0.1486	0.027367	0.26969	0.067093	0.44386	0.095373	0.087804	0.10894	0.27542	0.01336	0.029093	0.020371	0.043314	0.074281	0.057957	0.23108	0.34897	0.03798	0.096132	0.082651	0.068593	0.058304	0.15715	0.17872	0.45185	0.021667	0.15203	0.27786	NA	0.00086897
3-Hydroxyisovalery	0.8447	0.61953	0.51968	0.88698	0.55674	0.98475	0.3191	0.20506	0.89609	0.0046466	0.32669	0.26327	0.014474	0.34443	0.86067	0.19766	0.40328	0.16539	0.27431	0.44521	0.17841	0.49971	0.076527	0.27005	0.028076	0.13265	0.054301	0.68246	0.065807	0.19243	0.066937	0.15934	0.071855	0.42898	0.61575	0.62041	0.28052	0.17097	0.19292	0.18012	0.17459	0.51025	0.7487	0.35028	0.34773	0.3739	0.18414	0.00086897	NA
Adenine	0.5873	0.4204	0.84143	0.44896	0.3379	0.47788	0.14717	0.89536	0.054296	0.01916	0.1059	0.52082	0.91199	0.14841	0.44201	0.42453	0.20505	0.27702	0.37019	0.14072	0.24643	0.31226	0.10755	0.13213	0.20211	0.64661	0.28713	0.2566	0.053452	0.16622	0.16323	0.071765	0.19433	0.085347	0.41487	0.97396	0.37172	0.62703	0.36747	0.56145	0.48209	0.77435	0.43367	0.31535	0.93341	0.33358	0.26857	0.2821	0.36988
Glycyl-L-leucine	0.35758	0.69826	0.57404	0.099186	0.1607	0.76171	0.4063	0.7154	0.00022666	0.13213	0.070498	0.37026	0.68608	0.052229	0.066219	0.14789	0.0076234	0.026994	0.051134	0.010347	0.17453	0.20677	0.11585	0.74559	0.56922	0.07139	0.22122	0.042713	0.11232	0.011267	0.22495	0.015538	0.14501	0.29399	0.062892	0.14369	0.47019	0.31263	0.21323	0.30466	0.1521	0.85724	0.51501	0.45333	0.98585	0.54348	0.073273	0.86815	0.31706
L-Glutamine	0.21064	0.14279	0.61291	0.83694	0.38453	0.1879	0.025672	0.10432	0.13892	0.11899	0.020755	0.0083967	0.11525	0.096883	0.023813	0.13511	0.2317	0.22126	0.27861	0.026244	0.0067654	0.042396	0.062925	0.25228	0.018015	0.080093	0.0046037	0.012997	0.067583	0.022919	0.012617	0.085261	0.016731	0.27437	0.31775	0.096031	0.057585	0.046131	0.024058	0.074325	0.05147	0.014326	0.7226	0.40218	0.22692	0.16832	0.88934	0.25302	0.43577
Cytidine monophosp	0.18185	0.65754	0.7324	0.52783	0.080458	0.040561	0.015433	0.0097063	0.19709	0.13524	0.14902	0.12894	0.17317	0.054843	0.029346	0.052341	0.010897	0.016865	0.041457	0.010907	0.0012334	0.0060062	0.0042129	0.050373	0.029905	0.0095076	0.00018381	0.018432	0.0029074	0.0016723	0.0019614	0.043022	0.010978	0.13579	0.14055	0.068459	0.010375	0.010893	0.0038409	0.00889	0.0046	0.035106	0.56324	0.83333	0.137	0.18587	0.72692	0.0069019	0.12124
Oxidized glutathio	0.77808	0.93984	0.25636	0.43431	0.091171	0.1799	0.074082	0.002384	0.36563	0.086377	0.13036	0.074718	0.038319	0.1109	0.14161	0.17176	0.030597	0.014388	0.036272	0.048705	0.0090642	0.0011463	0.0011791	0.040549	0.0047792	0.0069654	0.00076611	0.0080894	0.0014979	0.00025362	0.0097485	0.026631	0.0088954	0.097079	0.048678	0.02371	0.028354	0.0008506	0.0019388	0.0041828	0.0018674	0.12665	0.96781	0.17701	0.069852	0.030058	0.28495	0.08591	0.07071
4-Hydroxyproline	0.78411	0.40141	0.8962	0.015326	0.0029153	0.033881	0.0048317	0.0048951	0.079131	0.016597	0.38835	0.1509	0.6085	0.0055866	0.0019246	0.0095765	0.00089783	0.00062089	0.002263	0.012032	0.0011387	0.014115	0.0087524	0.050908	0.092583	0.0020209	0.00019459	0.08848	0.0044644	0.00021284	0.079532	0.02536	0.020845	0.052335	0.010178	0.019625	0.045224	0.011231	0.0026668	0.0059316	0.0034574	0.55279	0.96464	0.15673	0.35563	0.15202	0.0043036	0.054213	0.29055
Creatine	0.3752	0.22348	0.8276	0.016366	0.0014063	0.011854	0.00044024	0.00476	0.0040601	0.03831	0.13076	0.14575	0.58739	0.0059109	0.0011412	0.013669	0.00064765	0.001583	0.0089505	0.0019884	0.0062027	0.003304	0.0023134	0.021486	0.014564	0.00050343	2.15e-05	0.013674	0.00053957	0.00022919	0.010564	0.0083371	0.017582	0.026396	0.003298	0.0047998	0.009461	0.0061004	0.00062473	0.0029631	0.0009023	0.42825	0.72461	0.4775	0.25923	0.39221	0.14263	0.064594	0.36547
Sarcosine	0.43327	0.11859	0.48094	0.097199	0.036875	0.039334	0.0014455	0.048711	0.00090234	0.0069355	0.15981	0.096125	0.81087	0.029746	0.0050278	0.026978	0.0022949	0.014268	0.041595	0.0046228	0.0035531	0.029501	0.030449	0.15032	0.14047	0.01223	0.0016578	0.042668	0.0076263	0.0022518	0.021444	0.025076	0.063568	0.037474	0.022099	0.065635	0.023691	0.075498	0.0073894	0.049304	0.022229	0.32315	0.55084	0.83975	0.48644	0.96186	0.12819	0.051355	0.71935
ADP	0.85327	0.39713	0.68659	0.22027	0.08339	0.15605	0.036801	0.099055	0.015647	0.097704	0.33164	0.030036	0.40529	0.27036	0.066866	0.39604	0.085902	0.12943	0.30651	0.14338	0.17674	0.042588	0.13653	0.1852	0.19496	0.062066	0.02087	0.13333	0.055951	0.05032	0.20059	0.17861	0.29506	0.15563	0.098049	0.12306	0.17128	0.11151	0.012169	0.10266	0.065169	0.6749	0.053439	0.5608	0.56343	0.82372	0.40562	0.31187	0.89055
NADH	0.2035	0.056758	0.37069	0.10496	0.029892	0.042848	0.0026174	0.14084	0.10911	0.0027312	0.70958	0.41112	0.69947	0.032061	0.021658	0.092332	0.086781	0.16239	0.31899	0.085878	0.015298	0.13477	0.048056	0.1429	0.097904	0.060806	0.0026762	0.34518	0.068542	0.061525	0.31686	0.25365	0.38082	0.46357	0.16357	0.16893	0.16981	0.20314	0.096579	0.15149	0.10557	0.55654	0.30822	0.77739	0.57799	0.77603	0.28972	0.014943	0.21266
Hypoxanthine	0.94724	0.55323	0.49695	0.083572	0.065987	0.8042	0.11834	0.12465	0.025048	0.04125	0.4584	0.77806	0.45972	0.00086626	0.037406	0.013756	0.0019731	0.00083061	0.0026897	0.0032573	0.0061396	0.10791	0.0072647	0.0090948	0.023742	0.0017167	0.00042408	0.029739	0.023318	0.0047563	0.044376	0.028721	0.0050981	0.12758	0.0099268	0.018745	0.0257	0.041646	0.041554	0.028873	0.018233	0.11014	0.083919	0.59691	0.88796	0.21371	0.027242	0.47857	0.082192
Inosine	0.89922	0.95058	0.72236	0.037136	0.02923	0.64306	0.10006	0.072648	0.023201	0.052328	0.41786	0.8005	0.60767	0.001699	0.013651	0.0065472	7.36e-05	2.26e-05	0.00014772	0.0011111	0.0050005	0.051203	0.0031699	0.010285	0.052083	0.00024081	0.00064559	0.018172	0.0093069	0.0008601	0.028405	0.014018	0.0029294	0.078125	0.0049387	0.019324	0.018092	0.026534	0.01829	0.011908	0.0063235	0.21839	0.078707	0.49557	0.63479	0.098149	0.0075569	0.25486	0.16228
D-Ribose 5-phospha	0.55695	0.79576	0.48294	0.0072398	0.0072447	0.55157	0.029025	0.024988	0.11084	0.034667	0.79587	0.9209	0.42912	0.027976	0.0089828	0.011399	0.00074222	0.0002217	0.00082735	0.011677	0.0065507	0.0027296	3.3e-05	0.002841	0.0034309	1.84e-06	0.00018595	0.0025253	0.0086887	0.00035812	0.032457	0.014779	0.005574	0.13233	0.0010224	0.0058953	0.0042572	0.0030898	0.0047243	0.002238	0.00035097	0.10315	0.20216	0.084738	0.089996	0.018983	0.018533	0.29226	0.10758
L-Threonic Acid	0.5867	0.49068	0.16021	0.02157	0.011082	0.22326	0.015547	0.019263	0.010549	0.058584	0.20535	0.84774	0.56983	0.00081798	0.0011954	0.00016681	4.44e-07	1.73e-07	1.84e-06	7.22e-05	0.0016897	0.022643	0.0018045	0.00343	0.0071408	2.86e-05	0.00018593	0.0030921	0.0003262	5.82e-05	0.002964	0.00034533	7.94e-05	0.0081289	4.81e-05	0.0015077	0.00031594	0.0042592	0.0034197	0.0010814	0.00058418	0.032544	0.011387	0.35804	0.22537	0.051361	0.020692	0.13321	0.1144
L-Aspartic acid	0.11016	0.10478	0.17557	0.0021523	9.09e-05	0.0093543	0.00034082	0.0021696	0.021775	0.57803	0.312	0.76469	0.87848	0.001067	6.07e-06	0.0015105	0.00012143	0.00012149	0.00078196	0.0026708	0.032025	0.011124	0.020738	0.0008058	0.0059855	5.84e-05	3.25e-05	0.012045	0.001118	0.0037327	0.0021859	0.010199	0.0022385	0.011705	0.0005993	0.0036685	0.00054916	0.0036844	0.0011133	0.0010403	0.00080703	0.10223	0.1234	0.97637	0.25228	0.13215	0.19918	0.20794	0.47417
Glycerol 3-phospha	0.64678	0.5008	0.36402	0.10852	0.027055	0.46939	0.016476	0.084691	0.036518	0.001347	0.16774	0.50904	0.67839	0.011003	0.0012253	0.0033285	0.00061652	0.00014376	0.00086272	0.0010652	0.00042231	0.011453	0.00054828	0.037369	0.010691	0.00018339	0.00024273	0.0013071	0.015657	0.0001101	0.010242	0.0029064	0.0025281	0.28604	0.0060885	0.027071	0.01605	0.021118	0.014708	0.01961	0.0031482	0.035897	0.72411	0.14191	0.17798	0.053203	0.019349	0.11473	0.1969
Taurine	0.85787	0.90079	0.74126	0.061485	0.021332	0.35307	0.035904	0.16033	0.00091845	0.010249	0.01765	0.75443	0.77392	0.0029973	0.00094375	0.0028103	4.35e-06	2.16e-05	9.25e-05	1.34e-05	0.00096182	0.033989	0.0011456	0.025129	0.046908	0.00025418	0.001962	0.0013881	0.0010997	6.48e-05	0.00082213	0.00014198	0.0002281	0.047688	0.013044	0.077843	0.013211	0.036886	0.015532	0.016323	0.0055597	0.15221	0.2486	0.66029	0.25506	0.068746	0.0049894	0.056844	0.20727
3-Phosphoglyceric	0.97059	0.59846	0.5956	0.12244	0.12242	0.82987	0.13193	0.5252	0.0053789	0.0030805	0.80471	0.80497	0.76523	0.1312	0.089981	0.18985	0.029298	0.056548	0.21498	0.070529	0.14688	0.14399	0.016151	0.16848	0.08368	0.0026172	0.013094	0.11528	0.13487	0.088117	0.16024	0.13566	0.19516	0.65564	0.047966	0.18162	0.13109	0.24933	0.13335	0.19375	0.070024	0.70872	0.42146	0.43035	0.77782	0.86009	0.11339	0.27281	0.097383
D-Erythrose 4-phos	0.19645	0.4077	0.56154	0.027817	0.01728	0.13709	0.0044651	0.092717	0.03202	0.011782	0.74525	0.90643	0.52019	0.1025	0.074529	0.053207	0.0039959	0.020348	0.049684	0.017668	0.019539	0.0065075	5.14e-05	0.0054313	0.0068736	0.00031547	0.00082907	0.021981	0.0016161	0.0052244	0.045655	0.024849	0.05579	0.093904	0.004999	0.053946	0.0057685	0.027649	0.007097	0.0070982	0.0018796	0.35798	0.73033	0.48808	0.10087	0.76891	0.27927	0.058718	0.044688
Glucose 6-phosphat	0.20738	0.30804	0.34272	0.041582	0.069342	0.32739	0.028535	0.41374	0.018639	0.074777	0.75884	0.5477	0.75214	0.20111	0.10755	0.14986	0.034377	0.13369	0.29043	0.11045	0.30248	0.03161	0.0075804	0.033529	0.012933	0.0034238	0.025456	0.082505	0.019498	0.12494	0.081484	0.12132	0.1015	0.09589	0.017566	0.11697	0.010972	0.13057	0.031702	0.046285	0.027738	0.47324	0.8721	0.86598	0.36822	0.61987	0.65494	0.34897	0.10962
Pyruvic acid	0.1966	0.084147	0.34336	0.18715	0.072527	0.36994	0.03605	0.019134	0.25781	0.43006	0.84514	0.78543	0.45797	0.022137	0.13362	0.14343	0.12512	0.16505	0.21823	0.14259	0.071549	0.10697	0.047178	0.0092233	0.0042593	0.004538	0.00131	0.089512	0.042425	0.11159	0.014015	0.25363	0.037142	0.31294	0.12869	0.27994	0.034993	0.020402	0.051579	0.041354	0.038649	0.0099284	0.08238	0.75917	0.45248	0.14157	0.44415	0.48581	0.026528
Hypotaurine	0.20294	0.036938	0.040515	0.01558	0.0055849	0.17056	0.001095	0.011643	0.0086581	0.037904	0.35705	0.75375	0.30345	0.0012348	0.0020597	0.0018284	0.00087172	0.00049888	0.0022542	0.0050021	0.011382	0.020877	0.0041314	0.0026369	0.00035016	0.00011304	2.48e-05	0.017523	0.00076689	0.0020217	0.0071071	0.0028183	0.0007754	0.0083564	0.00010652	0.001979	0.00044831	0.0022403	0.0019272	0.0013354	0.00077893	0.056048	0.16546	0.2563	0.29865	0.24576	0.071524	0.30424	0.028866
Niacinamide	0.29714	0.13511	0.40997	0.076185	0.013838	0.18417	0.0047418	0.0077265	0.021205	0.051676	0.23332	0.8632	0.21955	0.00033128	0.012371	0.0062939	0.0016284	0.0008413	0.0040539	0.0026391	0.003801	0.0080956	0.00088173	0.0006884	8.42e-05	0.00033941	2.89e-06	0.0040928	0.00026148	0.00059335	0.0019363	0.0035528	0.0003512	0.014228	0.00056323	0.0039938	0.00088314	0.00095115	0.0017905	0.0012356	0.00057208	0.021876	0.18618	0.51616	0.32408	0.17319	0.15068	0.29313	0.03187
D-Sedoheptulose 7-	0.07382	0.15514	0.052337	0.022344	0.023129	0.11207	0.0030941	0.026364	0.018613	0.13146	0.4193	0.92865	0.28476	0.09105	0.017145	0.0057021	0.0026923	0.011487	0.032766	0.046487	0.14399	0.0060111	0.004046	0.019474	0.0003566	0.00013323	0.0070585	0.010948	0.00042484	0.011567	0.001717	0.0060828	0.0033385	0.0014718	0.00020777	0.011322	4.31e-05	0.0033307	0.0014057	0.0013895	0.00063714	0.062418	0.20715	0.30813	0.038356	0.32172	0.40694	0.11057	0.043735
Xanthine	0.1963	0.24891	0.16792	0.013069	0.020043	0.31809	0.015099	0.026862	0.17327	0.20747	0.72102	0.69794	0.33106	0.058581	0.055057	0.040023	0.012279	0.010913	0.025781	0.07789	0.095023	0.0065177	0.001198	0.0020462	0.00071205	0.00019929	0.00095471	0.027743	0.0083614	0.015596	0.14204	0.070773	0.026346	0.04463	0.00015807	0.0011982	0.0010958	0.0031993	0.005061	0.0016407	0.0010173	0.14099	0.16363	0.11975	0.14401	0.2896	0.35292	0.71995	0.11305
Oxypurinol	0.13133	0.1576	0.13406	0.023224	0.020652	0.35587	0.0087344	0.022454	0.13607	0.16967	0.76218	0.71315	0.30993	0.036352	0.047175	0.033953	0.014813	0.013037	0.034653	0.065844	0.074275	0.0094118	0.0011645	0.0017507	0.00039737	0.00013329	0.00028883	0.027176	0.0087159	0.020468	0.069014	0.074739	0.021483	0.055578	0.00042051	0.0033651	0.00098862	0.0033771	0.0060886	0.0022162	0.0010721	0.0837	0.16789	0.20632	0.17621	0.30674	0.36461	0.56175	0.060077
Choline	0.44647	0.93838	0.57429	0.01488	0.010104	0.0074675	0.091943	0.01744	0.11941	0.30854	0.38152	0.57787	0.77822	0.018933	0.0015183	0.0020948	0.00016273	0.0015537	0.00088421	0.016479	0.11087	0.090426	0.28627	0.15829	0.36369	0.019676	0.10777	0.051804	0.0095461	0.0063333	0.08057	0.010579	0.014987	0.01264	0.0054262	0.013355	0.020304	0.013748	0.015237	0.0046787	0.0087581	0.32343	0.010013	0.33308	0.11607	0.014986	0.32474	0.4404	0.2572
L-Arginine	0.27491	0.96867	0.40731	0.011876	0.013877	0.067065	0.18096	0.059256	0.31235	0.2334	0.62735	0.94002	0.66426	0.38947	0.02849	0.082964	0.02483	0.031028	0.04164	0.45177	0.70225	0.075094	0.39641	0.061088	0.045088	0.052446	0.47563	0.10916	0.0092616	0.12949	0.25778	0.015368	0.052916	0.0065392	0.0024136	0.012566	0.016945	0.0066006	0.019257	0.005646	0.014607	0.78579	0.23755	0.098906	0.016402	0.083028	0.84821	0.74404	0.90872
L-Glutamic acid	0.33569	0.99855	0.64734	0.16802	0.045312	0.28818	0.018943	0.012436	0.38715	0.038546	0.38578	0.41595	0.033187	0.50591	0.089165	0.24087	0.015823	0.0090184	0.020817	0.029992	0.011678	5.27e-06	3.77e-08	0.00023407	0.00010953	5.37e-05	0.00024481	0.00017433	0.00057839	0.0002493	0.020153	0.017553	0.0066007	0.074397	0.0030737	0.0058386	0.00084098	0.00041839	0.00024025	0.00040305	6.19e-05	0.13848	0.92965	0.063533	0.002087	0.058052	0.33922	0.18262	0.049355
L-Carnitine	0.06084	0.74964	0.12804	0.072473	0.019126	0.0038912	0.0029393	0.0026725	0.43832	0.099974	0.21386	0.16937	0.10642	0.13462	0.0089106	2.19e-05	0.00034356	0.00074389	0.00078472	0.013792	0.0044261	0.00062734	0.00017554	0.02616	0.00052208	0.00074005	0.0077972	0.00065548	2.02e-05	1.77e-05	0.0025722	0.00014304	0.00060853	0.00066038	0.00016212	0.00067989	1.65e-05	0.00012331	0.00019098	2.84e-05	7.3e-06	0.024362	0.066166	0.0093065	2.13e-06	0.0033397	0.36382	0.00014135	0.065873
L-Lactic acid	0.91513	0.63658	0.84162	0.48313	0.064716	0.28621	0.05891	0.0087855	0.62232	0.034995	0.075193	0.41945	0.2655	0.060154	0.0096582	0.035755	0.0076864	0.00074964	0.00085951	0.003822	0.00019323	0.016239	0.0031819	0.0084257	0.0079886	0.0024666	0.00036879	0.0020651	0.010175	0.00011443	0.0070754	0.0047327	0.00052226	0.33443	0.020246	0.042197	0.02373	0.0061871	0.018596	0.013904	0.0061858	0.0036137	0.26104	0.13908	0.050071	0.0014345	0.019375	0.19055	0.064513
2-Hydroxycaproic a	0.88139	0.95447	0.57178	0.91103	0.2649	0.26037	0.10299	0.061405	0.086816	0.26538	0.035113	0.066351	0.032458	0.078802	0.017975	0.09288	0.0041494	0.0037601	0.0041818	0.00044228	0.00075294	0.003744	0.0026952	0.002937	0.0060265	0.014269	0.0024802	2.92e-05	0.00087991	0.0001033	0.025357	0.00054174	8.27e-05	0.015519	0.00056131	0.0016181	0.001603	0.0014021	0.0018593	0.0012787	0.00085642	0.040797	0.48198	0.030204	0.02656	0.046942	0.27694	0.93228	0.97333
LysoPC(14:0)	0.9194	0.54834	0.16612	0.64714	0.62642	0.19201	0.64156	0.094996	0.33032	0.24947	0.015692	0.09845	0.024009	0.81113	0.86103	0.87992	0.40771	0.49779	0.59728	0.15335	0.90106	0.078786	0.1701	0.26813	0.025997	0.26996	0.19427	0.030641	0.016208	0.12228	0.02713	0.057933	0.079716	0.17636	0.1637	0.028227	0.09574	0.033012	0.06516	0.054052	0.056119	0.28529	0.75734	0.66694	0.099897	0.28318	0.059409	0.94736	0.42685
Lysyl-Leucine	0.85327	0.22718	0.56532	0.88754	0.73991	0.94918	0.74102	0.58913	0.037251	0.75704	0.025236	0.62072	0.39637	0.098547	0.40985	0.068322	0.003672	0.012826	0.0097944	0.0014688	0.096403	0.10734	0.014864	0.084616	0.072784	0.060529	0.26362	0.00042053	0.0059172	0.0075403	0.0027058	0.0018154	0.0016296	0.028127	0.051057	0.19549	0.022279	0.075996	0.12775	0.060428	0.040421	0.056298	0.011968	0.86559	0.14885	0.061044	0.66287	0.52026	0.82124
sn-2 LysoPC(18:2)	0.040936	0.25016	0.21486	0.040974	0.12907	0.14859	0.14849	0.11246	0.85588	0.077498	0.09388	0.29513	0.50045	0.7842	0.62703	0.88215	0.69954	0.79797	0.7457	0.54556	0.30675	0.15702	0.85648	0.03096	0.18467	0.34986	0.74328	0.37787	0.43271	0.98372	0.71838	0.80806	0.66236	0.25074	0.13109	0.2472	0.15794	0.13875	0.1397	0.18574	0.3041	0.87499	0.44032	0.67629	0.13767	0.69283	0.14731	0.5308	0.14736
sn-1 LysoPC(18:2)	0.073965	0.79131	0.66065	0.26774	0.44303	0.20124	0.33754	0.2643	0.95574	0.14553	0.69904	0.83307	0.79858	0.64648	0.67305	0.87915	0.86295	0.96742	0.86703	0.85638	0.35675	0.16083	0.46201	0.098603	0.12585	0.55452	0.97605	0.17892	0.24009	0.72932	0.87551	0.8251	0.84334	0.17196	0.38459	0.34274	0.25276	0.16705	0.15546	0.20002	0.29893	0.79262	0.44638	0.64997	0.048487	0.462	0.051729	0.8576	0.47285
LysoPC(20:4(5Z,8Z,	0.068519	0.84888	0.48392	0.13826	0.28344	0.11646	0.23479	0.13127	0.96695	0.26895	0.73048	0.51066	0.76191	0.89159	0.86054	0.43579	0.32099	0.45383	0.30758	0.776	0.91995	0.054869	0.23094	0.016748	0.066879	0.2815	0.71375	0.052878	0.076059	0.29148	0.49966	0.40959	0.54515	0.038747	0.11997	0.16818	0.042618	0.058438	0.056371	0.066303	0.1226	0.59546	0.08335	0.76021	0.011966	0.20753	0.22021	0.61891	0.56489
LysoPE(16:0)	0.0054293	0.11456	0.13035	0.059587	0.026237	0.010534	0.013214	0.0079566	0.72542	0.35263	0.94096	0.8354	0.66051	0.12926	0.081558	0.06954	0.16941	0.16028	0.14231	0.32103	0.37122	0.0092507	0.11199	0.00083596	0.00049884	0.073352	0.027679	0.0069694	0.021654	0.077268	0.13561	0.14882	0.11424	0.043728	0.018727	0.0045364	0.0032523	0.0018465	0.0065722	0.0067877	0.013782	0.042766	0.069152	0.9573	0.016756	0.082087	0.13169	0.71816	0.80857
sn-2 LysoPC(18:0)	0.12277	0.96293	0.35846	0.28757	0.26538	0.28852	0.10911	0.10283	0.39214	0.46775	0.7083	0.82982	0.31705	0.79877	0.52544	0.10583	0.055344	0.073284	0.08596	0.18645	0.38335	0.013894	0.020099	0.010922	0.0089491	0.018352	0.14733	0.0033796	0.020029	0.04975	0.063242	0.1221	0.1672	0.091333	0.075507	0.12953	0.010408	0.033261	0.0081685	0.027802	0.024175	0.27537	0.24186	0.95497	0.0058016	0.15291	0.47336	0.029785	0.31989
LysoPE(20:4)	0.44826	0.91836	0.67743	0.5315	0.61771	0.47846	0.44996	0.22646	0.27054	0.91366	0.38622	0.97221	0.37891	0.60041	0.76952	0.24533	0.13298	0.18638	0.1317	0.18589	0.43486	0.11342	0.18182	0.034446	0.06858	0.22722	0.43473	0.0061731	0.056948	0.089708	0.089087	0.10743	0.16078	0.042762	0.13999	0.17511	0.042634	0.083934	0.071253	0.12561	0.14305	0.2015	0.087028	0.58094	0.058768	0.13742	0.59935	0.43889	0.89153
sn-1 LysoPC(18:0)	0.054405	0.44897	0.31171	0.15069	0.1383	0.06535	0.070923	0.02407	0.57563	0.57613	0.61453	0.7774	0.65683	0.23982	0.37025	0.086486	0.11956	0.11931	0.083532	0.20438	0.35812	0.028191	0.098495	0.013138	0.011226	0.11387	0.11007	0.0088381	0.027822	0.049555	0.071505	0.14186	0.15741	0.038633	0.069188	0.03776	0.015369	0.014857	0.024219	0.032287	0.042562	0.067411	0.034291	0.59111	0.042631	0.069066	0.29742	0.41056	0.91742
sn-1 LysoPC(16:0)	0.062809	0.54987	0.4646	0.3705	0.31184	0.1151	0.15967	0.063366	0.69699	0.35079	0.60196	0.98218	0.41408	0.58489	0.66415	0.29504	0.32462	0.3523	0.27034	0.37798	0.68022	0.043415	0.17733	0.015663	0.012011	0.23286	0.24536	0.01206	0.049602	0.15208	0.13366	0.22863	0.25067	0.064698	0.13577	0.066333	0.026841	0.026054	0.036106	0.053983	0.081481	0.13113	0.089986	0.60445	0.029847	0.13359	0.09055	0.62322	0.87417
sn-2 LysoPC(16:0)	0.20665	0.71435	0.53862	0.42668	0.44217	0.13258	0.21207	0.10594	0.47889	0.82831	0.45925	0.62291	0.33747	0.59647	0.68172	0.27643	0.20017	0.28769	0.21399	0.21641	0.41363	0.045823	0.13335	0.029476	0.02221	0.19642	0.25002	0.011705	0.036029	0.080903	0.23168	0.18439	0.22883	0.066781	0.1083	0.039849	0.030465	0.03816	0.027579	0.050614	0.087221	0.18538	0.14148	0.90231	0.033949	0.18129	0.20242	0.44872	0.98758
cis-5-Tetradecenoy	0.59658	0.27753	0.86947	0.35479	0.4156	0.60664	0.37168	0.88155	0.17649	0.49765	0.80863	0.57637	0.38331	0.45861	0.44063	0.91137	0.94597	0.98612	0.72358	0.65713	0.88004	0.64518	0.86609	0.4905	0.49912	0.94766	0.44701	0.24691	0.73491	0.81773	0.27332	0.72003	0.35008	0.86641	0.44463	0.3101	0.5966	0.50933	0.78809	0.79616	0.93193	0.1014	0.037257	0.60047	0.090819	0.032209	0.5704	0.40441	0.50582
Dodecanoylcarnitin	0.72461	0.5437	0.81492	0.061987	0.16352	0.23486	0.47449	0.94884	0.69357	0.57389	0.43983	0.74993	0.12109	0.75714	0.6391	0.66661	0.72929	0.64859	0.50414	0.76456	0.24491	0.83566	0.81457	0.60475	0.5334	0.90937	0.85269	0.18872	0.63768	0.58609	0.074054	0.41614	0.1049	0.83274	0.45666	0.20493	0.42568	0.60201	0.7017	0.86668	0.91815	0.018035	0.06317	0.629	0.25813	0.092031	0.95621	0.19999	0.18013
L-Octanoylcarnitin	0.79732	0.31617	0.7601	0.070954	0.19765	0.16327	0.26153	0.77505	0.26654	0.86772	0.80337	0.97571	0.12716	0.54904	0.38193	0.89044	0.78655	0.98989	0.88347	0.75565	0.52399	0.86351	0.81868	0.54815	0.54393	0.97093	0.84129	0.36464	0.97899	0.96365	0.24336	0.87765	0.29577	0.50551	0.19119	0.15937	0.78874	0.76545	0.90568	0.95652	0.90484	0.071415	0.13921	0.57789	0.37243	0.13935	0.61754	0.33123	0.10221
O-decanoyl-L-carni	0.58231	0.41077	0.91538	0.19365	0.27151	0.25253	0.35899	0.71037	0.42205	0.94321	0.97809	0.59571	0.33244	0.85105	0.49422	0.7119	0.99277	0.86914	0.75967	0.82266	0.63433	0.80878	0.88808	0.51446	0.53225	0.96082	0.73738	0.29241	0.98641	0.97467	0.25444	0.9169	0.30215	0.81348	0.32774	0.20152	0.64675	0.78506	0.80287	0.97911	0.9527	0.075298	0.063337	0.40054	0.45528	0.18011	0.55326	0.41008	0.34251
Tetradecanoylcarni	0.69885	0.6953	0.89284	0.065606	0.25544	0.63635	0.9346	0.7105	0.60473	0.47198	0.028704	0.24009	0.047764	0.88101	0.86689	0.37957	0.36613	0.33091	0.21802	0.15428	0.11564	0.44911	0.40365	0.4655	0.22236	0.69675	0.75104	0.022018	0.16838	0.14003	0.010884	0.075907	0.024305	0.29059	0.94319	0.76621	0.19621	0.29811	0.29783	0.46927	0.48716	0.012274	0.096198	0.69201	0.13576	0.063119	0.8429	0.17131	0.27909
L-Palmitoylcarniti	0.33454	0.97228	0.58602	0.65823	0.8076	0.99781	0.74017	0.34215	0.60839	0.96752	0.33868	0.46584	0.079935	0.78441	0.94446	0.32742	0.42373	0.34554	0.2694	0.45794	0.38099	0.17456	0.33653	0.15191	0.060971	0.50378	0.55282	0.014236	0.16094	0.16017	0.064582	0.13965	0.10635	0.15777	0.47348	0.44049	0.088309	0.09254	0.12082	0.23218	0.24314	0.051862	0.1248	0.88577	0.080953	0.088307	0.38158	0.47949	0.67402
Stearoylcarnitine	0.40103	0.51061	0.9489	0.55808	0.6699	0.82883	0.86179	0.31702	0.5977	0.94377	0.45967	0.78456	0.18455	0.844	0.70058	0.39246	0.44108	0.32039	0.16946	0.29124	0.14197	0.1262	0.11754	0.13445	0.1187	0.52526	0.50224	0.015105	0.2024	0.084895	0.20963	0.33201	0.18244	0.30615	0.63297	0.35093	0.14636	0.12622	0.19202	0.21169	0.24941	0.033352	0.036321	0.92543	0.055246	0.022911	0.43445	0.32559	0.84233
D-Glyceraldehyde 3	0.32459	0.64116	0.40025	0.86583	0.77556	0.41507	0.66327	0.4808	0.22125	0.5626	0.66791	0.45966	0.19672	0.96038	0.99289	0.89362	0.60005	0.62782	0.64571	0.61283	0.75137	0.34349	0.50836	0.52438	0.19405	0.59367	0.53297	0.36472	0.91875	0.43124	0.84662	0.77954	0.41001	0.476	0.98256	0.80315	0.71859	0.30437	0.52493	0.68032	0.58859	0.66449	0.45622	0.11369	0.56195	0.038059	0.34054	0.47752	0.30464
Succinic acid	0.65235	0.72568	0.24852	0.058965	0.40948	0.70066	0.63588	0.61501	0.27317	0.56986	0.57544	0.25332	0.030922	0.53583	0.39137	0.39616	0.37566	0.47091	0.5799	0.71066	0.58833	0.54231	0.66362	0.38074	0.24717	0.75804	0.76551	0.28588	0.65835	0.83687	0.32744	0.7001	0.38326	0.73302	0.45563	0.52059	0.78931	0.29492	0.6748	0.68022	0.70191	0.13191	0.74923	0.80499	0.16468	0.18059	0.29111	0.93549	0.33139
Hexanoylcarnitine	0.90118	0.43195	0.90855	0.035764	0.22524	0.22436	0.46646	0.92293	0.32609	0.15147	0.48865	0.28635	0.027771	0.75199	0.70712	0.64707	0.86736	0.51516	0.48221	0.8329	0.13468	0.74765	0.54135	0.5335	0.32648	0.86065	0.74401	0.28097	0.67835	0.47899	0.24433	0.40577	0.11418	0.60038	0.4079	0.44714	0.57896	0.53077	0.61228	0.73667	0.77903	0.064092	0.31431	0.57201	0.19002	0.10545	0.96847	0.049021	0.010409
Butyrylcarnitine	0.69612	0.36259	0.37755	0.17808	0.66581	0.62048	0.92104	0.8421	0.9042	0.0019848	0.065517	0.12936	0.035446	0.38551	0.95577	0.34155	0.31552	0.1407	0.12363	0.065022	0.002954	0.25378	0.012987	0.28268	0.11643	0.35032	0.12165	0.064222	0.14119	0.021669	0.19398	0.090129	0.034288	0.99109	0.99747	0.754	0.53433	0.29269	0.29414	0.30061	0.25133	0.17313	0.78931	0.24414	0.21283	0.085814	0.25285	0.023686	0.0054301
2-Hydroxybutyric a	0.64763	0.65734	0.83992	0.054465	0.32856	0.89764	0.85622	0.90942	0.050224	0.16121	0.00020343	0.3604	0.3142	0.2434	0.19621	0.16685	0.017341	0.047396	0.034731	0.00012128	0.0012517	0.51598	0.23776	0.70547	0.58773	0.31352	0.24231	0.0099661	0.073904	0.019513	0.00053457	0.0093735	0.00061714	0.25776	0.49567	0.71657	0.071667	0.54366	0.39439	0.44058	0.38311	0.00019347	0.061897	0.55667	0.62838	0.21928	0.42871	0.26754	0.64352
3-Hydroxyisovaleri	0.77422	0.61834	0.37931	0.00059738	0.041911	0.36761	0.69204	0.52965	0.35707	0.25657	0.01137	0.087819	0.03946	0.87178	0.90123	0.9637	0.68291	0.78762	0.74902	0.041209	0.041706	0.7668	0.36885	0.89201	0.52325	0.9047	0.56146	0.059599	0.40142	0.30483	0.068171	0.18038	0.049125	0.63012	0.96291	0.98139	0.35067	0.80662	0.74659	0.8121	0.71302	0.024137	0.84457	0.89931	0.61552	0.74683	0.73416	0.65308	0.67171
Uridine 5'-monopho	0.91554	0.98223	0.48813	0.62054	0.67844	0.35759	0.32447	0.33218	0.18672	0.12036	0.056762	0.034871	0.30428	0.55594	0.31655	0.40507	0.25236	0.33865	0.52964	0.21065	0.1365	0.36744	0.41172	0.95324	0.66874	0.4329	0.20687	0.36808	0.16477	0.15504	0.023222	0.20954	0.23005	0.47168	0.91617	0.96629	0.47775	0.48896	0.22188	0.51736	0.38259	0.57207	0.32954	0.75548	0.57826	0.78533	0.62357	0.0072302	0.22657
Guanosine monophos	0.95227	0.50961	0.1318	0.69362	0.65311	0.39035	0.33969	0.20358	0.17608	0.18792	0.063044	0.012773	0.072227	0.48616	0.46297	0.45767	0.13704	0.17548	0.30968	0.09317	0.11437	0.087104	0.084247	0.5915	0.34238	0.1596	0.090386	0.14273	0.046197	0.048831	0.039834	0.1976	0.12998	0.24718	0.69121	0.47735	0.28361	0.17675	0.041259	0.1357	0.10389	0.88009	0.39973	0.78783	0.3913	0.53536	0.77181	0.019139	0.24305
trans-2-Tetradecen	0.7246	0.64205	0.67932	0.64003	0.87977	0.32636	0.59335	0.72194	0.077323	0.16224	0.30484	0.088335	0.79683	0.70335	0.065085	0.17678	0.043129	0.37834	0.32714	0.11817	0.03228	0.35186	0.39408	0.76893	0.81222	0.33903	0.79702	0.25635	0.23792	0.12033	0.50146	0.12152	0.15442	0.3084	0.50169	0.48714	0.17064	0.63958	0.25457	0.32507	0.36661	0.394	0.61857	0.2149	0.23374	0.72616	0.43291	0.15236	0.57903
Acetaminophen	0.060353	0.023669	0.11169	0.41918	0.66448	0.60769	0.19508	0.44245	0.10899	0.56265	0.054456	0.10141	0.61293	0.43118	0.34522	0.4865	0.16539	0.26824	0.28906	0.052753	0.46638	0.84134	0.95004	0.49348	0.36227	0.58423	0.99515	0.25297	0.95317	0.39537	0.47653	0.30497	0.21847	0.77984	0.95511	0.62722	0.84161	0.83623	0.79769	0.83815	0.77153	0.92308	0.71592	0.57923	0.73372	0.33281	0.70214	0.84593	0.2475
Adenosine 3'-monop	0.21557	0.090647	0.11045	0.98666	0.77565	0.89695	0.56253	0.50347	0.046514	0.40565	0.061562	0.14234	0.93911	0.35426	0.42779	0.41766	0.18198	0.4103	0.55913	0.19327	0.57707	0.82289	0.71414	0.77855	0.92921	0.70203	0.92431	0.20437	0.4092	0.27011	0.42287	0.11119	0.38242	0.90171	0.97975	0.98882	0.79698	0.89841	0.62868	0.82675	0.6862	0.38094	0.28158	0.73798	0.67992	0.63574	0.56056	0.22286	0.68463
L-Proline	0.075089	0.35969	0.99756	0.35492	0.14957	0.007423	0.12353	0.011473	0.0925	0.23376	0.56238	0.21739	0.14949	0.9181	0.42371	0.78692	0.80437	0.89226	0.98662	0.49602	0.70354	0.039939	0.35623	0.11658	0.032203	0.64489	0.22934	0.52672	0.1323	0.37772	0.84918	0.72223	0.50906	0.12821	0.13412	0.017999	0.11728	0.0064456	0.056359	0.020787	0.059924	0.55857	0.8716	0.019573	0.012239	0.16634	0.31474	0.98336	0.95013
L-Acetopine	0.054882	0.41288	0.55408	0.075728	0.026986	0.018045	0.040523	0.028824	0.60899	0.74328	0.82364	0.13126	0.1839	0.93878	0.095446	0.38661	0.29043	0.36853	0.49109	0.94141	0.99709	0.0095937	0.15103	0.069619	0.0040237	0.12931	0.21989	0.095843	0.0084545	0.12656	0.44602	0.03628	0.19994	0.036695	0.005689	0.0066066	0.016	0.0014274	0.0081147	0.004726	0.0067196	0.99443	0.52483	0.0094524	0.00085195	0.31628	0.39417	0.61403	0.77354
(S)-2-Azetidinecar	0.97401	0.51925	0.62309	0.41079	0.11643	0.052706	0.097685	0.22366	0.74764	0.46201	0.16089	0.47621	0.87399	0.40307	0.042621	0.69188	0.28273	0.25989	0.22482	0.04292	0.049984	0.067688	0.068343	0.024291	0.13591	0.1346	0.021472	0.070148	0.15756	0.066037	0.65283	0.31292	0.2013	0.66565	0.16321	0.033827	0.2291	0.22206	0.099743	0.12203	0.14824	0.45946	0.69418	0.48124	0.27405	0.42131	0.61171	0.90169	0.89456
Citrulline	0.081988	0.18486	0.84334	0.30236	0.061286	0.010214	0.036232	0.076623	0.96187	0.64598	0.48602	0.42656	0.74476	0.25854	0.11889	0.40895	0.42591	0.39859	0.35209	0.532	0.18694	0.15671	0.29236	0.052664	0.071989	0.81325	0.1609	0.32719	0.024947	0.11259	0.58134	0.068115	0.25686	0.10101	0.18566	0.17219	0.19219	0.03585	0.14836	0.086483	0.13856	0.81265	0.79613	0.36708	0.047031	0.39927	0.86277	0.25245	0.81771
5'-Methylthioadeno	0.44924	0.56333	0.26563	0.458	0.16724	0.10214	0.14021	0.010791	0.68902	0.78457	0.89332	0.034683	0.08852	0.98744	0.63891	0.78379	0.94488	0.97022	0.82965	0.65836	0.54095	0.013446	0.14728	0.21914	0.04732	0.28571	0.074803	0.32837	0.14313	0.18675	0.6181	0.73024	0.69115	0.44766	0.3115	0.13178	0.32277	0.014578	0.031515	0.073217	0.065387	0.86963	0.095092	0.10543	0.08897	0.38002	0.71283	0.70985	0.54911
L-Leucine	0.52648	0.23406	0.74158	0.9799	0.52542	0.13796	0.42758	0.25644	0.067092	0.2989	7.33e-05	0.10163	0.083341	0.28756	0.02248	0.013752	9.9e-05	0.00058877	0.00032896	5.73e-05	0.0062862	0.030837	0.021034	0.27299	0.12375	0.035028	0.16394	0.00077506	0.00027989	5.29e-05	0.00282	3.31e-06	3.24e-06	0.0033891	0.0031354	0.0059701	0.0023203	0.032837	0.011978	0.0062059	0.0067981	0.047767	0.084918	0.051819	0.017871	0.032852	0.21348	0.189	0.56739
L-Isoleucine	0.96088	0.96837	0.46244	0.60342	0.24415	0.079845	0.12335	0.12887	0.061303	0.13079	0.00097118	0.251	0.19259	0.081154	0.0032346	0.0025558	3.18e-05	9.76e-05	4.4e-05	4.05e-05	0.0013753	0.039007	0.023816	0.071702	0.035094	0.021285	0.051027	0.0011126	8.3e-05	3.45e-05	0.0039671	5.13e-07	5.84e-07	0.0014875	0.00028164	0.0026761	0.00043598	0.013498	0.00855	0.002932	0.0044491	0.015795	0.041784	0.058156	0.020009	0.035504	0.095778	0.1691	0.38121
L-Valine	0.71631	0.62701	0.32504	0.94242	0.36168	0.072465	0.060944	0.02197	0.12379	0.16781	0.00091818	0.070265	0.051624	0.13047	0.0074419	0.004427	0.00034455	0.00024007	0.00013575	0.00021439	0.0011843	0.040641	0.052547	0.070818	0.021059	0.028594	0.024755	0.0017768	6.81e-05	8.86e-05	0.00035224	8.58e-06	7.34e-07	0.00068848	0.0013559	0.006441	0.00017518	0.0052119	0.0035776	0.0024491	0.0042588	0.0030097	0.04495	0.12407	0.013985	0.018845	0.18111	0.056612	0.18872
L-Phenylalanine	0.7081	0.81212	0.64076	0.62124	0.1893	0.051754	0.11024	0.011753	0.2406	0.85738	0.00287	0.3094	0.058632	0.14281	0.024171	0.01879	0.0035718	0.0022371	0.0016741	0.004077	0.04447	0.016551	0.040446	0.052664	0.0038383	0.034147	0.041332	0.0016011	7.79e-05	0.00044248	0.00089004	2.78e-05	6.46e-06	0.00044694	0.00024807	0.00057318	0.00025395	0.00098079	0.0055033	0.0011778	0.0019075	0.0066887	0.036796	0.086269	0.011398	0.011939	0.51244	0.52112	0.33457
L-Tyrosine	0.58007	0.32741	0.46107	0.60013	0.81156	0.65827	0.77563	0.37953	0.25899	0.31538	0.00016564	0.27361	0.022851	0.29103	0.24743	0.14128	0.031832	0.020942	0.018103	0.0084796	0.074103	0.10434	0.030522	0.28133	0.024752	0.16979	0.26192	0.0067958	0.0015242	0.0032735	0.0053361	5.44e-05	3.28e-05	0.01641	0.03025	0.044549	0.028588	0.029264	0.09715	0.03033	0.030013	0.080925	0.23908	0.057346	0.048195	0.029278	0.2819	0.46394	0.10149
Coumarin	0.68553	0.33428	0.52562	0.82549	0.64976	0.46372	0.60462	0.33488	0.20979	0.24832	0.00026401	0.32515	0.028483	0.20128	0.19092	0.066211	0.013628	0.011706	0.0096306	0.0042641	0.044303	0.069332	0.012841	0.20792	0.018066	0.12272	0.20443	0.0039521	0.0004656	0.0011892	0.0040369	1.65e-05	1.53e-05	0.0047968	0.012949	0.024172	0.013605	0.020432	0.063647	0.015758	0.01479	0.084234	0.17632	0.049538	0.030126	0.030857	0.22359	0.31382	0.10672
D-Glucose	0.71243	0.45238	0.96691	0.78376	0.54543	0.2322	0.44999	0.17088	0.24638	0.29821	0.067976	0.069823	0.22519	0.58518	0.17767	0.060195	0.0037913	0.0054318	0.0024326	0.035282	0.043976	0.19217	0.21406	0.51856	0.55064	0.36537	0.59684	0.06126	0.0047871	0.0015866	0.14211	0.00019207	0.013686	0.0052425	0.0095109	0.084811	0.053525	0.054466	0.081786	0.04726	0.047874	0.55888	0.34788	0.028542	0.022988	0.083704	0.081269	0.15248	0.91028
Gamma-Glutamyltyro	0.46718	0.49263	0.49463	0.20594	0.5663	0.69846	0.81989	0.87042	0.56148	0.41104	0.0010994	0.30018	0.29752	0.78328	0.63098	0.60219	0.31165	0.35158	0.21947	0.084526	0.19186	0.92998	0.57527	0.92847	0.66803	0.65159	0.77962	0.26632	0.076373	0.11664	0.18695	0.0050041	0.029387	0.13145	0.44453	0.62484	0.47525	0.53534	0.8977	0.55531	0.628	0.40169	0.61966	0.27594	0.22011	0.30671	0.31976	0.54144	0.59683
L-gamma-glutamyl-L	0.38697	0.28978	0.29928	0.32861	0.80701	0.52177	0.81787	0.64808	0.72847	0.048448	0.0050088	0.12106	0.14535	0.79332	0.42793	0.40201	0.07	0.079622	0.039022	0.016659	0.0060324	0.29077	0.075598	0.51862	0.51799	0.57594	0.49696	0.084445	0.022537	0.0067589	0.1682	0.0053009	0.01147	0.14879	0.28122	0.38347	0.22948	0.2691	0.30755	0.19479	0.21962	0.28141	0.5867	0.10888	0.064769	0.11887	0.076518	0.10811	0.2986
L-gamma-glutamyl-L	0.79845	0.71708	0.58868	0.29046	0.82524	0.39018	0.44835	0.57721	0.25283	0.10014	0.0029817	0.088194	0.18501	0.85934	0.3383	0.36945	0.069454	0.092558	0.069389	0.016331	0.025993	0.25993	0.15895	0.60687	0.48536	0.72281	0.50312	0.055696	0.017504	0.012704	0.060865	0.002431	0.020095	0.044267	0.14615	0.32686	0.11295	0.27405	0.24447	0.23726	0.20434	0.27359	0.99118	0.30329	0.093588	0.47172	0.31885	0.1725	0.77264
Deoxyadenosine	0.9611	0.79341	0.75788	0.97546	0.60954	0.1362	0.30605	0.85071	0.060407	0.094925	0.013631	0.036227	0.17291	0.35929	0.11827	0.34111	0.094675	0.30916	0.24823	0.028579	0.007929	0.11468	0.11759	0.21361	0.19643	0.44127	0.17947	0.035608	0.023559	0.018595	0.21562	0.0072498	0.018826	0.16273	0.2094	0.16814	0.10239	0.2161	0.070247	0.13347	0.1656	0.2366	0.94876	0.28549	0.18252	0.8116	0.66985	0.64085	0.75742
L-Methionine	0.81545	0.52206	0.58444	0.34934	0.63551	0.40167	0.85338	0.88742	0.1477	0.99638	0.0010705	0.16378	0.070675	0.91396	0.82902	0.54393	0.19696	0.32056	0.27848	0.07227	0.69482	0.35546	0.37916	0.94734	0.3132	0.94493	0.8852	0.11705	0.015207	0.11351	0.088129	0.0038852	0.027765	0.0077816	0.083211	0.12843	0.099405	0.28966	0.25794	0.18929	0.22378	0.63355	0.73113	0.29405	0.16876	0.88526	0.65048	0.91398	0.84198
Tridecanoic acid	0.049615	0.4993	0.52549	0.5636	0.63354	0.88176	0.34891	0.30512	0.043346	0.83136	0.019736	0.6513	0.48692	0.67735	0.90349	0.89019	0.54395	0.74172	0.73253	0.20122	0.80533	0.033864	0.2039	0.091979	0.0599	0.16516	0.34598	0.33904	0.86141	0.98687	0.76594	0.17789	0.89031	0.86608	0.70987	0.84365	0.2838	0.159	0.11725	0.20633	0.22785	0.22125	0.7555	0.29324	0.14362	0.23927	0.48243	0.71151	0.85408
Pyroglutamine	0.28814	0.68397	0.40717	0.56773	0.59915	0.42432	0.63921	0.94778	0.18126	0.95318	0.25684	0.59521	0.58475	0.28208	0.97274	0.41111	0.68932	0.74393	0.83854	0.53149	0.81044	0.047223	0.22027	0.060977	0.38377	0.73869	0.7242	0.38548	0.85753	0.76692	0.078156	0.48794	0.66129	0.69887	0.97247	0.52529	0.74271	0.46726	0.14116	0.30373	0.46245	0.26901	0.26741	0.27119	0.12436	0.99917	0.22167	0.675	0.37558
C17-carnitine	0.12463	0.56754	0.17027	0.47811	0.32352	0.17333	0.63168	0.14112	0.017603	0.12414	0.094066	0.82734	0.34131	0.55992	0.90593	0.52288	0.77755	0.73965	0.81295	0.32145	0.8808	0.0094543	0.1402	0.0080219	0.053734	0.33973	0.41068	0.22395	0.34051	0.65291	0.49405	0.56694	0.72562	0.77113	0.46924	0.30412	0.22378	0.025098	0.063605	0.037615	0.098239	0.73958	0.68821	0.16931	0.0093908	0.12534	0.17131	0.64485	0.70667
L-Alanine	0.51047	0.72763	0.59337	0.98877	0.96485	0.79309	0.75517	0.98325	0.16936	0.17691	0.036175	0.82955	0.21035	0.53533	0.69354	0.40248	0.22799	0.26639	0.31	0.23514	0.82621	0.64295	0.24474	0.58565	0.32967	0.71073	0.87607	0.56221	0.028502	0.25504	0.073256	0.045612	0.082408	0.0085795	0.25019	0.83233	0.3271	0.63872	0.41113	0.41796	0.42533	0.65131	0.78154	0.83985	0.81646	0.60521	0.23214	0.27301	0.032323
Serylvaline	0.52458	0.73424	0.98657	0.45351	0.97462	0.69826	0.93505	0.72953	0.28011	0.25318	0.085187	0.57834	0.51564	0.48663	0.99543	0.30374	0.30074	0.45231	0.36809	0.37022	0.74706	0.57715	0.35043	0.78239	0.44941	0.69898	0.7845	0.56058	0.12461	0.31079	0.31709	0.17849	0.1177	0.0095066	0.34091	0.55572	0.34195	0.7733	0.44459	0.47239	0.62024	0.90238	0.37239	0.91387	0.85648	0.99782	0.16275	0.63904	0.25537
L-Threonine	0.81787	0.37265	0.8825	0.12695	0.082212	0.010643	0.20191	0.65419	0.70208	0.79861	0.92053	0.81472	0.15888	0.41274	0.096025	0.78709	0.91668	0.81225	0.84431	0.68486	0.51995	0.42923	0.78961	0.5603	0.88839	0.73361	0.231	0.99425	0.79783	0.77125	0.31236	0.47739	0.5916	0.43714	0.95618	0.20421	0.78929	0.92266	0.56116	0.73385	0.83587	0.77906	0.31021	0.98199	0.81256	0.75451	0.63952	0.62733	0.21895
Homocitrulline	0.094813	0.56142	0.82248	0.14504	0.45128	0.083706	0.31165	0.35421	0.067399	0.21409	0.0028689	0.64373	0.42959	0.19917	0.40225	0.27616	0.21199	0.062782	0.11093	0.080346	0.4724	0.36389	0.61857	0.64818	0.95088	0.919	0.87785	0.43466	0.72931	0.4598	0.049572	0.041781	0.022476	0.98887	0.92765	0.7738	0.96979	0.73203	0.81825	0.66944	0.76023	0.36977	0.60335	0.7357	0.2673	0.61992	0.20832	0.73024	0.17465
Epinephrine	0.28506	0.23842	0.51912	0.076402	0.049292	0.13578	0.31541	0.30712	0.20725	0.30046	0.099391	0.95404	0.22675	0.52472	0.57021	0.49891	0.33008	0.49166	0.36455	0.047207	0.057273	0.9804	0.29619	0.75709	0.86045	0.89599	0.91388	0.14212	0.66589	0.25617	0.090983	0.30608	0.075827	0.29388	0.82122	0.98917	0.39714	0.76969	0.91187	0.94393	0.8819	0.026526	0.067703	0.68627	0.6102	0.75326	0.40318	0.83949	0.95513
Pantothenic acid	0.15434	0.18034	0.47114	0.028277	0.022207	0.050357	0.15286	0.16151	0.2768	0.27729	0.088944	0.98384	0.18533	0.58052	0.51159	0.6644	0.45181	0.55415	0.42128	0.058083	0.069984	0.74395	0.43665	0.71928	0.77322	0.92998	0.96474	0.2025	0.87088	0.38208	0.17151	0.34808	0.07578	0.52392	0.99537	0.88666	0.56815	0.60193	0.69533	0.76918	0.89483	0.038454	0.084106	0.80465	0.47807	0.78438	0.37811	0.69198	0.80487
Cytosine	0.26761	0.73027	0.53985	0.068013	0.059959	0.53201	0.38867	0.025478	0.35586	0.40655	0.13327	0.59496	0.67208	0.36489	0.6645	0.30771	0.573	0.28044	0.30275	0.47407	0.71381	0.33465	0.58775	0.033982	0.084411	0.15076	0.3191	0.60626	0.34458	0.63778	0.69849	0.87738	0.63937	0.46472	0.39604	0.59066	0.43879	0.038293	0.15293	0.11082	0.16827	0.85949	0.18322	0.66687	0.15689	0.027572	0.67395	0.35066	0.24023
Tiglylcarnitine	0.12728	0.4875	0.48561	0.97876	0.74134	0.94198	0.21039	0.32423	0.20791	0.81462	0.84331	0.91517	0.22487	0.72666	0.95869	0.62277	0.5758	0.80412	0.98329	0.32874	0.61718	0.021567	0.039924	0.029415	0.026459	0.077887	0.059155	0.040779	0.12933	0.40204	0.10957	0.75827	0.29215	0.46592	0.35698	0.56109	0.08438	0.11057	0.057185	0.13629	0.11201	0.18538	0.8912	0.34644	0.62813	0.82668	0.12986	0.32632	0.81334
Alpha-ketoisovaler	0.90192	0.65968	0.68977	0.19465	0.22717	0.86666	0.80017	0.75967	0.53796	0.83196	0.99565	0.4713	0.77793	0.72974	0.88649	0.93923	0.61281	0.44163	0.67852	0.81752	0.67639	0.13893	0.1606	0.090265	0.09264	0.11318	0.23409	0.18915	0.59976	0.57789	0.61666	0.85691	0.78904	0.53923	0.76479	0.42789	0.65435	0.45028	0.23375	0.46963	0.38947	0.79817	0.78668	0.52903	0.81671	0.84119	0.35324	0.93226	0.30633
Uric acid	0.12342	0.61777	0.35039	0.38261	0.3638	0.59253	0.16403	0.80618	0.11096	0.31888	0.92219	0.64917	0.81181	0.41302	0.42975	0.28582	0.09034	0.22492	0.37271	0.15835	0.51998	0.1714	0.090131	0.060299	0.10028	0.032093	0.11813	0.19912	0.122	0.44927	0.23506	0.51226	0.30975	0.62331	0.44484	0.60526	0.092831	0.44379	0.080791	0.16966	0.19963	0.66133	0.41982	0.31199	0.58215	0.58363	0.38138	0.11767	0.11845
Pipecolic acid	0.23962	0.16351	0.61156	0.96503	0.50422	0.16696	0.3735	0.11054	0.53879	0.23683	0.71147	0.54375	0.70367	0.74651	0.85066	0.53424	0.30207	0.31345	0.26216	0.25852	0.78922	0.73116	0.55475	0.71292	0.44138	0.39678	0.60613	0.7392	0.611	0.80155	0.75759	0.95917	0.851	0.43282	0.77723	0.76139	0.78208	0.22989	0.81496	0.69045	0.73064	0.69853	0.3405	0.91402	0.65876	0.98242	0.42394	0.63577	0.60337
Pyroglutamic acid	0.15952	0.014486	0.68132	0.8118	0.50884	0.14728	0.30486	0.19694	0.46351	0.10493	0.38385	0.93334	0.53657	0.8124	0.8834	0.39438	0.11382	0.12219	0.12808	0.09815	0.41599	0.64275	0.098398	0.91973	0.89364	0.12866	0.98874	0.24837	0.81972	0.28001	0.75747	0.47787	0.33908	0.59672	0.92186	0.8338	0.83013	0.6485	0.67518	0.74317	0.62188	0.87154	0.4015	0.46259	0.76366	0.51583	0.38978	0.27478	0.23844
Oxoglutaric acid	0.8731	0.39699	0.10518	0.11052	0.10866	0.46954	0.38131	0.65703	0.30925	0.37169	0.65916	0.11751	0.12849	0.0024035	0.019866	0.022419	0.034129	0.016944	0.020912	0.045802	0.11876	0.67836	0.88289	0.2059	0.78913	0.22405	0.093033	0.8664	0.56569	0.35346	0.52083	0.41659	0.19563	0.83234	0.4448	0.30462	0.50319	0.94628	0.78101	0.62249	0.78675	0.39939	0.026334	0.28722	0.27482	0.61546	0.099256	0.28896	0.40946
Cholic acid	0.31621	0.022005	0.013131	0.088765	0.087535	0.49702	0.014856	0.33607	0.00064793	0.072565	0.95406	0.17554	0.94588	0.10899	0.081715	0.041615	0.12755	0.2555	0.54428	0.30973	0.55472	0.7462	0.5667	0.95192	0.41422	0.084616	0.077276	0.67748	0.40724	0.42868	0.15798	0.2222	0.73878	0.39141	0.13044	0.42766	0.30443	0.5117	0.26825	0.52099	0.24063	0.99806	0.35608	0.80334	0.85986	0.34269	0.40696	0.18796	0.42135
Hydroxyphenyllacti	0.85764	0.77517	0.073771	0.04493	0.17664	0.87242	0.34543	0.20199	0.52557	0.80593	0.35085	0.57476	0.62947	0.90968	0.27108	0.23217	0.12216	0.078	0.1409	0.70478	0.91415	0.28556	0.49895	0.6609	0.64342	0.020818	0.32253	0.5556	0.82865	0.43559	0.5478	0.87756	0.88976	0.98962	0.14204	0.18549	0.23231	0.51473	0.24941	0.4047	0.28433	0.57341	0.39823	0.81195	0.75023	0.58653	0.75964	0.72569	0.72396
Gamma-Glutamyl Glu	0.040764	0.048546	0.02637	0.61163	0.41042	0.12216	0.066324	0.32212	0.86371	0.66291	0.57606	0.18635	0.11065	0.12638	0.19746	0.062218	0.25957	0.3071	0.16564	0.24525	0.12996	0.86995	0.87243	0.59914	0.60497	0.8576	0.62557	0.58587	0.23714	0.30109	0.14865	0.10418	0.3327	0.17117	0.35937	0.97681	0.26058	0.53144	0.82532	0.73997	0.70884	0.022753	0.043151	0.33483	0.4226	0.40286	0.51512	0.19934	0.75829
N-Acetyl-L-asparti	0.4246	0.71507	0.81057	0.15607	0.41733	0.49433	0.9474	0.86505	0.054007	0.34549	0.16032	0.00014939	0.0016676	0.71153	0.8519	0.88377	0.91471	0.77978	0.5399	0.43915	0.68535	0.93327	0.81604	0.72578	0.32424	0.56164	0.28773	0.72072	0.50211	0.81709	0.39802	0.50036	0.35598	0.72816	0.73846	0.32387	0.65405	0.54068	0.38591	0.54332	0.53402	0.8844	0.25979	0.17985	0.79885	0.6398	0.75029	0.88527	0.053137
Propionylcarnitine	0.22755	0.76968	0.65672	0.60888	0.6679	0.14152	0.32467	0.62235	0.69122	0.8441	0.99011	0.60868	0.42151	0.92713	0.68342	0.30936	0.86472	0.94063	0.96219	0.68798	0.6941	0.8624	0.9487	0.22664	0.4925	0.48469	0.58792	0.25389	0.633	0.9848	0.48577	0.99359	0.54433	0.21899	0.70527	0.44128	0.90402	0.7079	0.82367	0.8388	0.94416	0.4835	0.97655	0.29234	0.98892	0.47053	0.98088	0.013103	0.65806
Adenosine monophos	0.977	0.86312	0.32294	0.63242	0.88322	0.37972	0.57152	0.90721	0.41133	0.19101	0.10772	0.049847	0.78948	0.89667	0.6161	0.8219	0.74591	0.98037	0.86914	0.59404	0.4563	0.69373	0.78179	0.41689	0.81595	0.90998	0.83826	0.82961	0.51398	0.46878	0.34611	0.51835	0.8028	0.86985	0.45572	0.51238	0.75041	0.98562	0.64675	0.96875	0.90197	0.63677	0.063344	0.90766	0.74071	0.86776	0.74263	0.047169	0.74553
NAD	0.20985	0.56357	0.28651	0.7797	0.97238	0.90921	0.7167	0.81073	0.92162	0.20963	0.32192	0.22992	0.92157	0.55803	0.68902	0.90508	0.94317	0.75768	0.78153	0.7837	0.47588	0.64113	0.73859	0.43587	0.38072	0.67921	0.937	0.65351	0.81016	0.69826	0.85036	0.99754	0.95192	0.76534	0.31701	0.51092	0.25051	0.63349	0.83373	0.62483	0.60221	0.29821	0.21118	0.82048	0.52828	0.67025	0.082182	0.27807	0.87737
Adenosine	0.99209	0.38248	0.94478	0.97584	0.78295	0.1664	0.45883	0.38885	0.74383	0.23452	0.6562	0.32679	0.51098	0.5263	0.58841	0.77651	0.97261	0.77772	0.91077	0.91449	0.12236	0.62624	0.70945	0.34808	0.41656	0.37335	0.78869	0.40052	0.81063	0.53274	0.91218	0.82859	0.80726	0.82372	0.60515	0.73126	0.64621	0.98107	0.59227	0.69742	0.69319	0.57503	0.64635	0.98539	0.98554	0.79671	0.17216	0.1137	0.98424
Inosinic acid	0.53194	0.70757	0.62882	0.60962	0.74468	0.31032	0.62299	0.45127	0.96991	0.59035	0.46722	0.8149	0.63196	0.86905	0.53622	0.95276	0.86927	0.85027	0.70134	0.97328	0.82458	0.91363	0.5239	0.60787	0.65711	0.55592	0.70997	0.83444	0.97408	0.94953	0.18356	0.98026	0.92321	0.87392	0.39591	0.58085	0.95031	0.93885	0.7907	0.65802	0.79386	0.44324	0.61129	0.12637	0.85226	0.88854	0.48819	0.2746	0.76967
Phenylalanyl-Gluta	0.34243	0.96927	0.91223	0.73691	0.85779	0.31488	0.99381	0.89837	0.85848	0.8097	0.10573	0.41836	0.6712	0.79172	0.26086	0.60968	0.49535	0.46131	0.26985	0.4058	0.32692	0.57171	0.48795	0.72175	0.48501	0.39097	0.58878	0.99039	0.52797	0.36966	0.98763	0.10022	0.34264	0.49078	0.57978	0.87655	0.88529	0.94114	0.75042	0.96513	0.89219	0.94917	0.92837	0.26137	0.50846	0.36899	0.098311	0.89416	0.44949
L-Tryptophan	0.85016	0.78167	0.26358	0.71904	0.99759	0.39384	0.97619	0.18665	0.0086109	0.35268	0.89926	0.88552	0.32045	0.52272	0.47152	0.58631	0.29083	0.64413	0.88548	0.26664	0.99264	0.52479	0.84011	0.77039	0.68521	0.3222	0.82292	0.86711	0.73133	0.74077	0.86408	0.88852	0.94991	0.32064	0.96795	0.69683	0.97186	0.30971	0.90556	0.6319	0.73932	0.86387	0.89536	0.30771	0.21915	0.17809	0.86268	0.89039	0.9673
Pivaloylcarnitine	0.73886	0.13543	0.81439	0.60832	0.70211	0.3106	0.5816	0.39276	0.051751	0.59533	0.96952	0.70057	0.5538	0.89446	0.73008	0.065278	0.58754	0.37436	0.23996	0.64169	0.85258	0.86917	0.9896	0.56976	0.88323	0.92869	0.44537	0.96667	0.60416	0.39349	0.94547	0.37619	0.38817	0.22331	0.47632	0.29413	0.66428	0.3394	0.76079	0.34009	0.42887	0.82858	0.098001	0.013926	0.053829	0.0078376	0.34429	0.085466	0.60589
Isovalerylcarnitin	0.30018	0.12327	0.94541	0.90808	0.84194	0.70874	0.31338	0.8931	0.11174	0.78219	0.60183	0.42916	0.54323	0.86881	0.90201	0.12554	0.7054	0.45958	0.30281	0.7573	0.6776	0.69172	0.78396	0.26055	0.79453	0.5156	0.2641	0.83357	0.80005	0.41646	0.77288	0.2782	0.40122	0.41511	0.71359	0.52809	0.88041	0.65134	0.81499	0.70693	0.81365	0.98013	0.30656	0.0061285	0.16604	0.028658	0.13843	0.13124	0.56056
Isobutyryl-L-carni	0.80938	0.24055	0.84155	0.93849	0.9634	0.5203	0.63006	0.62372	0.088555	0.79495	0.88748	0.33418	0.38989	0.72348	0.74158	0.084339	0.68752	0.43089	0.29225	0.71019	0.495	0.8422	0.86806	0.46953	0.78992	0.78469	0.52921	0.95585	0.60661	0.31437	0.83676	0.30803	0.30884	0.29586	0.51177	0.37751	0.77462	0.34152	0.75096	0.36346	0.44518	0.79942	0.32683	0.0017071	0.096807	0.020725	0.24266	0.14331	0.5897
Phosphorylcholine	0.67827	0.79072	0.5806	0.28137	0.25957	0.68016	0.5486	0.63839	0.78363	0.84615	0.5813	0.93646	0.21568	0.58685	0.30272	0.51142	0.68289	0.40474	0.52037	0.82861	0.98664	0.56143	0.77673	0.3391	0.2448	0.47394	0.48523	0.14153	0.42283	0.86738	0.64142	0.42385	0.49682	0.28543	0.8179	0.90792	0.4126	0.46063	0.73905	0.80441	0.91408	0.36175	0.75133	0.89429	0.18786	0.86658	0.25739	0.55316	0.70101
2-Methylguanosine	0.95474	0.18857	0.30522	0.26583	0.47018	0.27543	0.33798	0.99787	0.42939	0.26407	0.77739	0.8263	0.0194	0.5905	0.19378	0.65606	0.68796	0.85874	0.93547	0.91248	0.37887	0.30062	0.27815	0.19092	0.052623	0.6878	0.88069	0.16147	0.546	0.90351	0.65816	0.69913	0.32876	0.73793	0.50239	0.31889	0.4243	0.26392	0.4278	0.32163	0.33893	0.74731	0.52635	0.4138	0.32373	0.44983	0.083171	0.2937	0.31745
3, 5-Tetradecadien	0.4534	0.94614	0.24919	0.58225	0.70108	0.21387	0.51876	0.19498	0.92199	0.66194	0.018454	0.37949	0.039314	0.83068	0.6468	0.92888	0.55993	0.5644	0.47932	0.31075	0.32646	0.083762	0.23782	0.062506	0.060719	0.51912	0.2392	0.088664	0.024748	0.17682	0.024966	0.14444	0.025448	0.16113	0.93441	0.58006	0.13063	0.079388	0.066296	0.11298	0.22693	0.17071	0.36314	0.56158	0.13798	0.20437	0.43094	0.54873	0.16381
D-Maltose	0.96006	0.61321	0.5758	0.008203	0.12786	0.80533	0.61521	0.83357	0.13222	0.83823	0.1206	0.31765	0.054634	0.53012	0.44657	0.85317	0.52903	0.80611	0.85276	0.73067	0.47677	0.64914	0.74314	0.93924	0.4493	0.43354	0.87557	0.67272	0.72739	0.79718	0.59937	0.9298	0.32486	0.92365	0.5047	0.69052	0.65416	0.93187	0.72535	0.81257	0.98736	0.14703	0.73924	0.82571	0.59432	0.95483	0.079681	0.4542	0.15965
Methionyl-Phenylal	0.85168	0.54442	0.25065	0.077517	0.21189	0.58549	0.93568	0.84767	0.98771	0.83807	0.11247	0.74517	0.48213	0.98084	0.97457	0.33883	0.96092	0.85657	0.95181	0.61485	0.56337	0.50346	0.30103	0.79286	0.97827	0.33167	0.63322	0.67345	0.87351	0.88423	0.097892	0.61505	0.28448	0.24625	0.67071	0.62561	0.44183	0.65265	0.97629	0.71328	0.58487	0.041258	0.12257	0.17842	0.83254	0.98298	0.52537	0.29634	0.71216
Glycerophosphochol	0.65857	0.44866	0.37443	0.31685	0.78491	0.9248	0.55885	0.73394	0.73759	0.16899	0.65004	0.41429	0.46385	0.85629	0.72214	0.34462	0.46668	0.50737	0.26984	0.9012	0.32523	0.4714	0.47377	0.65958	0.52806	0.91684	0.098944	0.78899	0.9262	0.94956	0.85647	0.23659	0.66672	0.22842	0.42297	0.96695	0.92582	0.94226	0.65469	0.98555	0.98794	0.62141	0.093501	0.58588	0.43112	0.16975	0.30185	0.56015	0.2292
Adenylsuccinic aci	0.4338	0.24554	0.74744	0.17966	0.44993	0.51581	0.97454	0.46427	0.76953	0.93481	0.26594	0.95938	0.8815	0.96302	0.4035	0.16247	0.049232	0.050919	0.013126	0.26401	0.62548	0.47222	0.40234	0.64086	0.75378	0.38199	0.54506	0.19055	0.096923	0.053191	0.61504	0.015189	0.13041	0.029129	0.037155	0.17167	0.26086	0.22426	0.40433	0.17862	0.22138	0.91309	0.10065	0.049264	0.030548	0.01693	0.039516	0.68275	0.70777
Fructose 1,6-bisph	0.32377	0.066673	0.77248	0.37916	0.31403	0.66683	0.094306	0.85049	0.18331	0.073481	0.43613	0.65256	0.69719	0.45554	0.60463	0.72095	0.9674	0.74711	0.39083	0.82	0.59606	0.37442	0.25683	0.15525	0.2199	0.2936	0.053922	0.87389	0.67304	0.94352	0.9048	0.59688	0.67703	0.70366	0.70229	0.86698	0.58121	0.89397	0.47112	0.81808	0.67717	0.95594	0.073567	0.28711	0.48166	0.029356	0.71736	0.79688	0.33627
L-Lysine	0.020568	0.31987	0.43547	0.0031407	0.013058	0.063909	0.006193	0.059048	0.75758	0.7433	0.038021	0.9164	0.36733	0.87334	0.19325	0.46322	0.26433	0.50791	0.62011	0.79112	0.55993	0.01636	0.021553	0.12635	0.20441	0.013804	0.069851	0.30611	0.30695	0.25871	0.83404	0.93345	0.53932	0.6991	0.062224	0.1252	0.1523	0.10173	0.080282	0.071519	0.031812	0.89162	0.59823	0.33453	0.075982	0.76036	0.81429	0.49336	0.44633
(R)-3-Hydroxybutyr	0.1191	0.082859	0.3862	0.1176	0.10777	0.30924	0.090749	0.38741	0.74051	0.30215	0.03601	0.39756	0.11277	0.26653	0.13969	0.71526	0.91925	0.99564	0.79342	0.98777	0.89669	0.58434	0.9924	0.31464	0.96673	0.28613	0.086866	0.89711	0.44636	0.59907	0.69715	0.13072	0.36794	0.50399	0.66922	0.60191	0.73273	0.93226	0.58199	0.76255	0.64453	0.83059	0.81703	0.30705	0.3018	0.38402	0.46486	0.32289	0.085629
4-Hydroxybutyric a	0.12405	0.084608	0.38687	0.11703	0.11058	0.3204	0.095293	0.40387	0.74542	0.30998	0.034517	0.39081	0.10852	0.26954	0.14452	0.72039	0.93599	0.9932	0.78206	0.96836	0.91024	0.60483	0.99199	0.33035	0.9849	0.29382	0.091644	0.86965	0.43144	0.58281	0.67915	0.12612	0.35551	0.4929	0.67799	0.61639	0.75394	0.95895	0.60016	0.78056	0.65996	0.85163	0.79684	0.3088	0.28555	0.37216	0.4751	0.32055	0.087324
Fumaric acid	0.43684	0.49956	0.73805	0.21699	0.41299	0.68698	0.58979	0.74053	0.10112	0.88914	0.0032243	0.41296	0.77412	0.42572	0.89304	0.34487	0.17104	0.35316	0.2124	0.062996	0.41018	0.34899	0.42377	0.70959	0.44479	0.4382	0.48036	0.50338	0.22197	0.39477	0.081345	0.050978	0.13714	0.13528	0.80153	0.54969	0.80437	0.79334	0.97528	0.91529	0.72551	0.61744	0.11699	0.14169	0.9908	0.64506	0.68805	0.20465	0.85669
L-Malic acid	0.10288	0.10218	0.24531	0.12575	0.28102	0.9861	0.24108	0.28409	0.23938	0.88886	0.0033864	0.3447	0.86626	0.96221	0.96897	0.80757	0.26449	0.36681	0.28385	0.10517	0.62495	0.33371	0.34283	0.28809	0.097599	0.24605	0.23524	0.76373	0.63691	0.50605	0.46466	0.14991	0.4519	0.71166	0.46513	0.48961	0.58097	0.30777	0.63987	0.47829	0.39475	0.61548	0.83688	0.27308	0.71362	0.9228	0.78117	0.29829	0.41749
Uracil	0.14886	0.00014482	0.0011471	0.07192	0.10575	0.60599	0.061936	0.37196	0.60576	0.75312	0.14184	0.035601	0.049817	0.021867	0.10998	0.29436	0.78516	0.65924	0.63677	0.86342	0.50857	0.34973	0.53193	0.1911	0.59265	0.61991	0.13126	0.42022	0.82135	0.64337	0.99633	0.80009	0.96422	0.97264	0.45709	0.89426	0.65548	0.91478	0.66348	0.92694	0.85054	0.22497	0.1584	0.20384	0.19201	0.71744	0.23683	0.60036	0.74139
Pseudouridine	0.031635	2.72e-06	0.0011197	0.40061	0.37022	0.29878	0.058178	0.40563	0.97977	0.47124	0.19751	0.1191	0.038514	0.20334	0.35981	0.76201	0.39155	0.50506	0.54789	0.56807	0.85139	0.21803	0.097255	0.77767	0.96218	0.5199	0.42132	0.14217	0.44083	0.19055	0.85523	0.30526	0.35744	0.8775	0.96833	0.84763	0.93925	0.65904	0.42478	0.49726	0.41016	0.20911	0.52038	0.03877	0.09313	0.21439	0.56084	0.36338	0.60044
Guanine	0.45203	0.67963	0.62057	0.51728	0.68163	0.57925	0.74039	0.93519	0.79797	0.57931	0.5533	0.020663	0.26837	0.02322	0.45051	0.43986	0.48236	0.30761	0.23265	0.45267	0.10992	0.32843	0.8911	0.35192	0.7646	0.89913	0.31696	0.62615	0.76763	0.77917	0.94297	0.9325	0.46172	0.76588	0.97644	0.93061	0.9486	0.83335	0.39591	0.78155	0.63777	0.17554	0.011427	0.35825	0.11197	0.51815	0.030309	0.73183	0.54379
Guanosine	0.54042	0.65714	0.63863	0.47629	0.57845	0.50268	0.90754	0.64961	0.94157	0.54538	0.54824	0.044016	0.5988	0.025212	0.53567	0.41743	0.43875	0.22583	0.202	0.42109	0.15099	0.55652	0.75578	0.21891	0.77117	0.54191	0.16314	0.85095	0.95813	0.64122	0.80527	0.92173	0.3582	0.93902	0.65809	0.65204	0.7914	0.81424	0.67478	0.88877	0.98123	0.18085	0.019407	0.54073	0.18527	0.44747	0.050117	0.75296	0.25994
Glutathione	0.63968	0.57207	0.23279	0.37891	0.74814	0.4465	0.87159	0.32057	0.85764	0.32815	0.30381	0.056835	0.077787	0.16498	0.74748	0.5333	0.86125	0.75621	0.88857	0.81925	0.89427	0.31346	0.76722	0.93876	0.65802	0.58094	0.59323	0.2908	0.21438	0.45481	0.35447	0.19588	0.57235	0.083276	0.51036	0.67195	0.39292	0.17932	0.43135	0.4064	0.36786	0.97901	0.49193	0.23397	0.020883	0.37762	0.53769	0.93549	0.38924
gamma-Glutamylcyst	0.94824	0.32898	0.082928	0.035023	0.31912	0.44586	0.68487	0.85763	0.57827	0.32793	0.060692	0.055347	0.15727	0.66393	0.63161	0.72361	0.74944	0.75664	0.92941	0.53439	0.67459	0.80418	0.99899	0.74394	0.97454	0.26239	0.72473	0.47345	0.4791	0.58701	0.56358	0.45551	0.51207	0.48797	0.72083	0.81952	0.96293	0.6692	0.80373	0.72681	0.81623	0.82282	0.80553	0.67731	0.3096	0.52839	0.23895	0.72957	0.48032
Phosphoenolpyruvic	0.32933	0.21272	0.065177	0.34219	0.36342	0.94241	0.17427	0.79387	0.10089	0.14264	0.86022	0.64376	0.86373	0.43138	0.21606	0.23263	0.20603	0.35232	0.61868	0.39798	0.65621	0.48044	0.258	0.54317	0.12462	0.079527	0.22301	0.43818	0.31601	0.55431	0.30259	0.24035	0.35963	0.68859	0.06701	0.35047	0.12028	0.45827	0.47382	0.38483	0.23868	0.28408	0.99729	0.50105	0.66475	0.56155	0.86268	0.63335	0.21332
2-Hydroxypyridine	0.81702	0.093585	0.48554	0.19876	0.13903	0.67421	0.2337	0.33039	0.25519	0.88767	0.88867	0.19717	0.37617	0.067553	0.22611	0.63239	0.45386	0.32341	0.51188	0.41725	0.87712	0.51073	0.66847	0.17318	0.12673	0.24784	0.087833	0.52973	0.4859	0.57483	0.53579	0.59316	0.46778	0.92368	0.14183	0.24116	0.4794	0.38416	0.53728	0.53844	0.50572	0.37191	0.95634	0.53341	0.35925	0.79664	0.90583	0.14926	0.91075
Cytidine	0.3861	0.082963	0.089896	0.011525	0.044367	0.6136	0.05882	0.080694	0.39844	0.53687	0.30764	0.26235	0.91333	0.057321	0.094572	0.11911	0.17647	0.11651	0.1389	0.44519	0.28099	0.21398	0.11434	0.03375	0.052684	0.024209	0.022758	0.36513	0.23111	0.22657	0.4236	0.39251	0.18922	0.091374	0.0056817	0.038935	0.046056	0.069864	0.17143	0.078381	0.060648	0.24051	0.1711	0.30676	0.76678	0.42591	0.074783	0.48667	0.48035
Xanthosine	0.24588	0.051182	0.081326	0.052358	0.20191	0.34641	0.14697	0.59919	0.47522	0.4499	0.31454	0.1148	0.4562	0.33587	0.52966	0.54612	0.90132	0.95388	0.91422	0.95124	0.50189	0.71281	0.71194	0.29596	0.24933	0.42004	0.39863	0.95216	0.73575	0.73992	0.82086	0.85667	0.91162	0.26789	0.071989	0.12022	0.28544	0.64265	0.66046	0.46738	0.49559	0.87062	0.49505	0.92087	0.6736	0.31881	0.65001	0.10836	0.7277
Leucyl-Serine	0.45072	0.12916	0.23501	0.24665	0.20423	0.13142	0.36616	0.39263	0.11126	0.42349	0.30484	0.933	0.054126	0.59623	0.30463	0.8505	0.32992	0.47983	0.58131	0.10371	0.44346	0.56024	0.084459	0.60605	0.39053	0.41293	0.55936	0.1576	0.28779	0.36813	0.26346	0.32422	0.15331	0.42351	0.4782	0.47828	0.31927	0.74662	0.56972	0.49441	0.41173	0.50668	0.34628	0.963	0.79344	0.70727	0.73909	0.87873	0.25903
Fructose 6-phospha	0.45548	0.36534	0.70393	0.72715	0.67759	0.83452	0.24642	0.97243	0.022289	0.10389	0.42785	0.95639	0.28507	0.35304	0.71316	0.5884	0.36848	0.70969	0.89742	0.3007	0.66764	0.31196	0.13659	0.31057	0.075245	0.14306	0.12715	0.46673	0.11848	0.64226	0.11423	0.43201	0.24549	0.27643	0.38062	0.55296	0.1325	0.58032	0.1873	0.3381	0.30534	0.69434	0.68866	0.52957	0.79437	0.10709	0.67385	0.38854	0.021315
6-Phosphogluconic	0.71	0.67699	0.70902	0.88692	0.81646	0.65277	0.80463	0.83268	0.10837	0.3725	0.48985	0.7956	0.22429	0.7257	0.92388	0.80166	0.41576	0.67215	0.94126	0.44185	0.88674	0.23552	0.074963	0.35397	0.051806	0.099207	0.32151	0.22086	0.16142	0.62674	0.1259	0.33908	0.24584	0.66057	0.40649	0.57126	0.20343	0.4352	0.28537	0.31379	0.22639	0.70502	0.86819	0.94371	0.66728	0.54288	0.40114	0.56624	0.028462
Threoninyl-Leucine	0.02698	0.015694	0.009843	0.10049	0.058529	0.0065562	0.031109	0.08811	0.30436	0.96332	0.69279	0.58603	0.1687	0.19447	0.030172	0.0658	0.71091	0.76423	0.54991	0.9279	0.25577	0.70605	0.99371	0.55729	0.2575	0.85794	0.44175	0.8871	0.45736	0.47956	0.7002	0.36977	0.54512	0.3985	0.25298	0.33445	0.27476	0.19615	0.79988	0.37794	0.44163	0.040941	0.20786	0.36984	0.10383	0.12559	0.60107	0.37271	0.85691
Serylleucine	0.33525	0.15585	0.27306	0.28567	0.066301	0.011707	0.059708	0.0090473	0.37547	0.99805	0.65686	0.16969	0.86782	0.42001	0.038654	0.20652	0.54585	0.40838	0.25543	0.59478	0.11184	0.47881	0.76202	0.48989	0.40228	0.47914	0.16564	0.59542	0.33059	0.15733	0.51473	0.31734	0.45976	0.61969	0.40977	0.2027	0.43857	0.099861	0.36498	0.21917	0.25971	0.16195	0.54576	0.19589	0.062076	0.012267	0.35115	0.19823	0.88351
Leucyl-Arginine	0.75943	0.0128	0.13853	0.37269	0.43254	0.86307	0.42257	0.5089	0.22642	0.88393	0.056909	0.99494	0.34771	0.52869	0.5979	0.29984	0.11046	0.29842	0.26878	0.035007	0.38193	0.57311	0.10863	0.76119	0.67	0.60297	0.95737	0.057478	0.1262	0.17403	0.088047	0.10546	0.13348	0.2423	0.80116	0.69404	0.36162	0.73164	0.61566	0.44582	0.39253	0.58553	0.10036	0.5787	0.35505	0.45771	0.5762	0.096697	0.69589
Serinyl-Phenylalan	0.17391	0.020538	0.0076278	0.010487	0.014448	0.073157	0.068335	0.17783	0.42204	0.64563	0.10152	0.54319	0.04023	0.84123	0.010473	0.376	0.91549	0.83317	0.78144	0.3139	0.94865	0.86847	0.40989	0.5928	0.84089	0.59451	0.67947	0.65641	0.66168	0.85606	0.50732	0.99139	0.63494	0.78772	0.29903	0.59415	0.69827	0.53742	0.89117	0.76704	0.74843	0.68345	0.89447	0.29434	0.32471	0.4348	0.36884	0.74546	0.27391
Diethanolamine	0.60889	0.66955	0.49638	0.92909	0.81811	0.32603	0.91427	0.64929	0.58777	0.62756	0.90544	0.82333	0.81429	0.5438	0.74086	0.72069	0.41445	0.27985	0.22921	0.60817	0.82988	0.74322	0.95765	0.4627	0.28181	0.48971	0.89421	0.92324	0.72285	0.60876	0.3793	0.92843	0.77903	0.61454	0.58336	0.3936	0.76406	0.66107	0.89768	0.605	0.81771	0.77433	0.38835	0.31062	0.79784	0.3921	0.37798	0.33022	0.76458
Hydroxyhexanoycarn	0.34468	0.87683	0.57177	0.88931	0.75086	0.90961	0.60131	0.94126	0.36577	0.11472	0.62103	0.23813	0.89825	0.2631	0.43331	0.37952	0.63206	0.50268	0.54362	0.42517	0.040766	0.35373	0.089436	0.15293	0.22104	0.159	0.065123	0.40772	0.99703	0.53439	0.63962	0.55322	0.41391	0.25285	0.57481	0.83037	0.46507	0.77082	0.61086	0.60293	0.63274	0.031714	0.16229	0.58691	0.89297	0.37986	0.94151	0.13338	0.068141
Hydroxyvalerylcarn	0.81505	0.41628	0.45539	0.60805	0.8289	0.54944	0.98118	0.84939	0.97149	0.18156	0.55329	0.70272	0.45008	0.8179	0.69659	0.95954	0.46902	0.41521	0.53036	0.21833	0.097834	0.11748	0.047252	0.17411	0.27498	0.11438	0.10823	0.11168	0.69419	0.34488	0.27632	0.8646	0.2513	0.37689	0.56688	0.84979	0.37165	0.76146	0.2954	0.54879	0.52073	0.10035	0.57618	0.3994	0.8858	0.62463	0.64798	0.36913	0.16805
[truncated: 141 more columns]
