# Supplementary material for: Exploratory metabolomic analysis for characterizing the metabolic profile of the urinary bladder under estrogen deprivation
Source: Front Endocrinol (Lausanne). 2024 May 31;15:1384115. doi: 10.3389/fendo.2024.1384115 (PMC11176512; doi:10.3389/fendo.2024.1384115)
Supplement: Supplementary file 16 [file Table_2.xlsx]

## Sheet: Correlation
	S2	S8	S6	S7	O5	E4	E2	E6	O1	E1	O7	O4	O8	O2	O6	E5	S1	S4	E3	E8	S3	S5	O3	E7
S2	1	0.6444	0.29925	0.4394	-0.045241	0.035462	0.24708	0.31981	-0.067214	-0.14208	-0.41412	-0.32238	-0.3887	-0.43552	-0.44784	-0.035383	-0.027555	0.059013	0.1158	-0.046057	-0.24338	0.083318	-0.39032	-0.37464
S8	0.6444	1	0.62516	0.4633	0.11286	0.10623	0.1112	0.12566	-0.11711	-0.18306	-0.47639	-0.38025	-0.54834	-0.47711	-0.64134	-0.10122	0.10192	0.36023	-0.068455	-0.058532	-0.015007	0.22488	-0.31258	-0.40892
S6	0.29925	0.62516	1	0.37192	0.33322	0.22301	0.42674	0.28152	-0.16039	-0.17243	-0.20689	-0.20721	-0.36834	-0.40365	-0.50335	-0.19683	-0.15476	0.098302	-0.086415	-0.14026	-0.39978	-0.2385	-0.34612	-0.36804
S7	0.4394	0.4633	0.37192	1	0.15318	0.20543	0.35149	0.050996	-0.066247	-0.24365	-0.11904	-0.26306	-0.22985	-0.18431	-0.29802	-0.044909	-0.13379	0.15468	-0.13977	-0.19636	-0.23528	-0.23993	-0.36421	-0.54324
O5	-0.045241	0.11286	0.33322	0.15318	1	0.35837	-0.030366	-0.057477	-0.083289	-0.35114	0.30397	-0.066759	-0.17595	-0.14223	-0.29856	-0.16244	-0.36705	-0.023009	-0.18172	0.16957	-0.10734	-0.24368	-0.0075136	-0.14875
E4	0.035462	0.10623	0.22301	0.20543	0.35837	1	0.28577	0.16676	-0.38162	-0.15042	0.122	-0.21906	-0.3764	-0.34329	-0.41587	0.021678	-0.33826	-0.13281	0.091143	0.29726	-0.037013	-0.22072	-0.23517	-0.19018
E2	0.24708	0.1112	0.42674	0.35149	-0.030366	0.28577	1	0.3165	-0.1253	0.024978	-0.015328	-0.26254	-0.10364	-0.18797	-0.18608	-0.080177	-0.17539	-0.10794	0.041346	-0.25254	-0.48734	-0.5797	-0.46676	-0.29573
E6	0.31981	0.12566	0.28152	0.050996	-0.057477	0.16676	0.3165	1	-0.22696	0.13711	-0.039706	-0.21554	-0.28515	-0.34583	-0.21524	0.075146	-0.18215	-0.27329	0.35228	-0.0055075	-0.38497	-0.11694	-0.47744	-0.242
O1	-0.067214	-0.11711	-0.16039	-0.066247	-0.083289	-0.38162	-0.1253	-0.22696	1	0.20642	0.22399	0.098076	0.22205	0.29853	0.24413	-0.30003	0.22891	0.18913	-0.19269	-0.31355	-0.095404	-0.095139	0.056576	-0.13091
E1	-0.14208	-0.18306	-0.17243	-0.24365	-0.35114	-0.15042	0.024978	0.13711	0.20642	1	-0.11421	-0.10954	0.042647	-0.070406	0.055107	-0.010181	0.21537	0.087031	0.065437	-0.037345	-0.035633	-0.094926	-0.11807	0.1869
O7	-0.41412	-0.47639	-0.20689	-0.11904	0.30397	0.122	-0.015328	-0.039706	0.22399	-0.11421	1	0.084169	0.37655	0.28296	0.30132	-0.33412	-0.28164	-0.28301	0.087731	-0.042573	-0.1463	-0.33809	0.048386	-0.00097042
O4	-0.32238	-0.38025	-0.20721	-0.26306	-0.066759	-0.21906	-0.26254	-0.21554	0.098076	-0.10954	0.084169	1	0.33037	0.38629	0.48439	0.19399	-0.007359	0.064381	-0.36072	-0.16408	-0.14686	0.0080604	0.31995	-0.10404
O8	-0.3887	-0.54834	-0.36834	-0.22985	-0.17595	-0.3764	-0.10364	-0.28515	0.22205	0.042647	0.37655	0.33037	1	0.45156	0.63496	-0.20285	0.051392	-0.23645	-0.12966	-0.23281	-0.06275	-0.13881	0.16644	0.17946
O2	-0.43552	-0.47711	-0.40365	-0.18431	-0.14223	-0.34329	-0.18797	-0.34583	0.29853	-0.070406	0.28296	0.38629	0.45156	1	0.65857	0.068938	0.061163	-0.050425	-0.24072	-0.29777	0.064502	-0.069715	0.20883	0.038999
O6	-0.44784	-0.64134	-0.50335	-0.29802	-0.29856	-0.41587	-0.18608	-0.21524	0.24413	0.055107	0.30132	0.48439	0.63496	0.65857	1	0.09006	0.092666	-0.097047	-0.19924	-0.33193	-0.094998	-0.1085	0.23099	0.15327
E5	-0.035383	-0.10122	-0.19683	-0.044909	-0.16244	0.021678	-0.080177	0.075146	-0.30003	-0.010181	-0.33412	0.19399	-0.20285	0.068938	0.09006	1	-0.012489	0.08585	-0.14301	0.17127	0.24071	0.039161	-0.16287	-0.062575
S1	-0.027555	0.10192	-0.15476	-0.13379	-0.36705	-0.33826	-0.17539	-0.18215	0.22891	0.21537	-0.28164	-0.007359	0.051392	0.061163	0.092666	-0.012489	1	0.32697	-0.28175	-0.15246	0.24678	0.1575	-0.0072301	0.018636
S4	0.059013	0.36023	0.098302	0.15468	-0.023009	-0.13281	-0.10794	-0.27329	0.18913	0.087031	-0.28301	0.064381	-0.23645	-0.050425	-0.097047	0.08585	0.32697	1	-0.42897	-0.17939	0.1085	0.03454	-0.041851	-0.20382
E3	0.1158	-0.068455	-0.086415	-0.13977	-0.18172	0.091143	0.041346	0.35228	-0.19269	0.065437	0.087731	-0.36072	-0.12966	-0.24072	-0.19924	-0.14301	-0.28175	-0.42897	1	0.16875	0.055561	0.075271	-0.043253	0.20128
E8	-0.046057	-0.058532	-0.14026	-0.19636	0.16957	0.29726	-0.25254	-0.0055075	-0.31355	-0.037345	-0.042573	-0.16408	-0.23281	-0.29777	-0.33193	0.17127	-0.15246	-0.17939	0.16875	1	0.21652	0.1909	0.0068479	0.31558
S3	-0.24338	-0.015007	-0.39978	-0.23528	-0.10734	-0.037013	-0.48734	-0.38497	-0.095404	-0.035633	-0.1463	-0.14686	-0.06275	0.064502	-0.094998	0.24071	0.24678	0.1085	0.055561	0.21652	1	0.42493	0.22107	0.25633
S5	0.083318	0.22488	-0.2385	-0.23993	-0.24368	-0.22072	-0.5797	-0.11694	-0.095139	-0.094926	-0.33809	0.0080604	-0.13881	-0.069715	-0.1085	0.039161	0.1575	0.03454	0.075271	0.1909	0.42493	1	0.26657	0.16381
O3	-0.39032	-0.31258	-0.34612	-0.36421	-0.0075136	-0.23517	-0.46676	-0.47744	0.056576	-0.11807	0.048386	0.31995	0.16644	0.20883	0.23099	-0.16287	-0.0072301	-0.041851	-0.043253	0.0068479	0.22107	0.26657	1	0.39596
E7	-0.37464	-0.40892	-0.36804	-0.54324	-0.14875	-0.19018	-0.29573	-0.242	-0.13091	0.1869	-0.00097042	-0.10404	0.17946	0.038999	0.15327	-0.062575	0.018636	-0.20382	0.20128	0.31558	0.25633	0.16381	0.39596	1

## Sheet: P value
	S2	S8	S6	S7	O5	E4	E2	E6	O1	E1	O7	O4	O8	O2	O6	E5	S1	S4	E3	E8	S3	S5	O3	E7
S2	NA	0	2.738e-05	2.2646e-10	0.53539	0.62715	0.00058881	6.8618e-06	0.35684	0.050524	2.8607e-09	5.7304e-06	2.9911e-08	3.3882e-10	9.254e-11	0.62792	0.70589	0.41865	0.11161	0.52805	0.00071538	0.2531	2.591e-08	1.008e-07
S8	0	NA	0	1.6852e-11	0.12105	0.14464	0.12664	0.084072	0.1076	0.01147	3.7181e-12	6.2533e-08	2.2204e-16	3.4155e-12	0	0.16467	0.16174	3.3062e-07	0.34801	0.42245	0.83717	0.0018129	1.13e-05	4.6971e-09
S6	2.738e-05	0	NA	1.2676e-07	2.6307e-06	0.0019828	8.2776e-10	8.3272e-05	0.027062	0.017364	0.0041825	0.0041245	1.7071e-07	7.7029e-09	1.3434e-13	0.0064914	0.03301	0.17723	0.23582	0.053588	1.1017e-08	0.00092075	1.001e-06	1.7492e-07
S7	2.2646e-10	1.6852e-11	1.2676e-07	NA	0.034866	0.0044644	6.608e-07	0.48471	0.36382	0.00070518	0.10186	0.00024553	0.0014216	0.010908	2.9654e-05	0.53839	0.065735	0.033094	0.054435	0.0066229	0.0010842	0.00085546	2.3948e-07	4.4409e-16
O5	0.53539	0.12105	2.6307e-06	0.034866	NA	3.8392e-07	0.67748	0.43087	0.25326	6.7911e-07	2.0113e-05	0.36011	0.015172	0.050285	2.863e-05	0.025139	1.8985e-07	0.75268	0.0121	0.019341	0.14044	0.00070436	0.91805	0.040533
E4	0.62715	0.14464	0.0019828	0.0044644	3.8392e-07	NA	6.4217e-05	0.021473	5.5549e-08	0.038307	0.093564	0.0023923	8.6859e-08	1.2417e-06	2.4156e-09	0.76656	1.8124e-06	0.067754	0.21107	3.1146e-05	0.61216	0.002212	0.0010904	0.0085845
E2	0.00058881	0.12664	8.2776e-10	6.608e-07	0.67748	6.4217e-05	NA	8.6382e-06	0.084962	0.73229	0.83374	0.00025276	0.15474	0.009401	0.010156	0.27149	0.015502	0.13826	0.57112	0.0004395	9.9964e-13	0	1.1365e-11	3.4354e-05
E6	6.8618e-06	0.084072	8.3272e-05	0.48471	0.43087	0.021473	8.6382e-06	NA	0.0016388	0.059235	0.5865	0.0028206	6.6736e-05	1.0235e-06	0.0028601	0.30281	0.011896	0.00013617	6.2105e-07	0.93988	4.1505e-08	0.10811	3.2845e-12	0.00076877
O1	0.35684	0.1076	0.027062	0.36382	0.25326	5.5549e-08	0.084962	0.0016388	NA	0.0042712	0.0018922	0.17823	0.0020768	2.8689e-05	0.00068772	2.6041e-05	0.0014894	0.0089648	0.0077335	1.0579e-05	0.19041	0.19165	0.43815	0.071803
E1	0.050524	0.01147	0.017364	0.00070518	6.7911e-07	0.038307	0.73229	0.059235	0.0042712	NA	0.11665	0.13247	0.55907	0.33441	0.45015	0.88912	0.0028439	0.23248	0.36972	0.60896	0.62549	0.19265	0.10471	0.009821
O7	2.8607e-09	3.7181e-12	0.0041825	0.10186	2.0113e-05	0.093564	0.83374	0.5865	0.0018922	0.11665	NA	0.24826	8.5763e-08	7.6304e-05	2.3941e-05	2.4614e-06	8.2681e-05	7.6061e-05	0.22873	0.55975	0.043988	1.8349e-06	0.50737	0.9894
O4	5.7304e-06	6.2533e-08	0.0041245	0.00024553	0.36011	0.0023923	0.00025276	0.0028206	0.17823	0.13247	0.24826	NA	3.2379e-06	3.6994e-08	1.4309e-12	0.0073217	0.91973	0.37751	3.1777e-07	0.02369	0.043177	0.91211	6.7968e-06	0.15315
O8	2.9911e-08	2.2204e-16	1.7071e-07	0.0014216	0.015172	8.6859e-08	0.15474	6.6736e-05	0.0020768	0.55907	8.5763e-08	3.2379e-06	NA	6.1913e-11	0	0.0050028	0.48132	0.0010219	0.074593	0.0012273	0.38974	0.056125	0.021729	0.013228
O2	3.3882e-10	3.4155e-12	7.7029e-09	0.010908	0.050285	1.2417e-06	0.009401	1.0235e-06	2.8689e-05	0.33441	7.6304e-05	3.6994e-08	6.1913e-11	NA	0	0.34461	0.40186	0.48962	0.00082141	3.0128e-05	0.37661	0.33918	0.0038351	0.59319
O6	9.254e-11	0	1.3434e-13	2.9654e-05	2.863e-05	2.4156e-09	0.010156	0.0028601	0.00068772	0.45015	2.3941e-05	1.4309e-12	0	0	NA	0.21657	0.20351	0.18285	0.0058522	2.8906e-06	0.19231	0.13621	0.001344	0.034747
E5	0.62792	0.16467	0.0064914	0.53839	0.025139	0.76656	0.27149	0.30281	2.6041e-05	0.88912	2.4614e-06	0.0073217	0.0050028	0.34461	0.21657	NA	0.86421	0.2389	0.049019	0.018142	0.00082162	0.59165	0.024757	0.39107
S1	0.70589	0.16174	0.03301	0.065735	1.8985e-07	1.8124e-06	0.015502	0.011896	0.0014894	0.0028439	8.2681e-05	0.91973	0.48132	0.40186	0.20351	0.86421	NA	4.1357e-06	8.2151e-05	0.035729	0.0005982	0.029985	0.92114	0.79857
S4	0.41865	3.3062e-07	0.17723	0.033094	0.75268	0.067754	0.13826	0.00013617	0.0089648	0.23248	7.6061e-05	0.37751	0.0010219	0.48962	0.18285	0.2389	4.1357e-06	NA	6.6098e-10	0.013264	0.1362	0.63614	0.56643	0.0047933
E3	0.11161	0.34801	0.23582	0.054435	0.0121	0.21107	0.57112	6.2105e-07	0.0077335	0.36972	0.22873	3.1777e-07	0.074593	0.00082141	0.0058522	0.049019	8.2151e-05	6.6098e-10	NA	0.019945	0.44642	0.302	0.55348	0.0053582
E8	0.52805	0.42245	0.053588	0.0066229	0.019341	3.1146e-05	0.0004395	0.93988	1.0579e-05	0.60896	0.55975	0.02369	0.0012273	3.0128e-05	2.8906e-06	0.018142	0.035729	0.013264	0.019945	NA	0.0026949	0.0083303	0.92529	9.2044e-06
S3	0.00071538	0.83717	1.1017e-08	0.0010842	0.14044	0.61216	9.9964e-13	4.1505e-08	0.19041	0.62549	0.043988	0.043177	0.38974	0.37661	0.19231	0.00082162	0.0005982	0.1362	0.44642	0.0026949	NA	9.9223e-10	0.0021756	0.00035719
S5	0.2531	0.0018129	0.00092075	0.00085546	0.00070436	0.002212	0	0.10811	0.19165	0.19265	1.8349e-06	0.91211	0.056125	0.33918	0.13621	0.59165	0.029985	0.63614	0.302	0.0083303	9.9223e-10	NA	0.00020107	0.023923
O3	2.591e-08	1.13e-05	1.001e-06	2.3948e-07	0.91805	0.0010904	1.1365e-11	3.2845e-12	0.43815	0.10471	0.50737	6.7968e-06	0.021729	0.0038351	0.001344	0.024757	0.92114	0.56643	0.55348	0.92529	0.0021756	0.00020107	NA	1.5609e-08
E7	1.008e-07	4.6971e-09	1.7492e-07	4.4409e-16	0.040533	0.0085845	3.4354e-05	0.00076877	0.071803	0.009821	0.9894	0.15315	0.013228	0.59319	0.034747	0.39107	0.79857	0.0047933	0.0053582	9.2044e-06	0.00035719	0.023923	1.5609e-08	NA
