# Supplementary material for: Exploratory metabolomic analysis for characterizing the metabolic profile of the urinary bladder under estrogen deprivation
Source: Front Endocrinol (Lausanne). 2024 May 31;15:1384115. doi: 10.3389/fendo.2024.1384115 (PMC11176512; doi:10.3389/fendo.2024.1384115)
Supplement: Supplementary file 17 [file Table_3.xlsx]

## Sheet: Sheet1
PLS-DA cross validation details:
Measure	1 comps	2 comps	3 comps	4 comps	5 comps	6 comps	7 comps	8 comps
Accuracy	0.54	0.87667	0.95	0.95	1	1	1	1
R2	0.84577	0.91717	0.94844	0.97529	0.99023	0.99706	0.99873	0.99947
Q2	0.40328	0.60697	0.58997	0.60189	0.59876	0.58884	0.57481	0.57584
