# Supplementary material for: Exploratory metabolomic analysis for characterizing the metabolic profile of the urinary bladder under estrogen deprivation
Source: Front Endocrinol (Lausanne). 2024 May 31;15:1384115. doi: 10.3389/fendo.2024.1384115 (PMC11176512; doi:10.3389/fendo.2024.1384115)
Supplement: Supplementary file 18 [file Table_4.xlsx]

## Sheet: OVX vs SHAM T-test
	FC	log2(FC)	p.ajusted	‘-LOG10(p)
cis-5-Tetradecenoylcarnitine	2.3428	1.2282	0.041506	1.3819
N6-Acetyl-L-lysine	0.4507	-1.1498	0.027325	1.5634
LysoPC(15:0)	0.18976	-2.3978	0.00014733	3.8317
3, 5-Tetradecadiencarnitine	0.0231	-5.436	3.15e-06	5.5012

## Sheet: OVX vs E T-test
	FC	log2(FC)	p.ajusted	‘-LOG10(p)
2-Hydroxybutyric acid	2.1174	1.0823	0.012061	1.9186
4-Guanidinobutanoic acid	0.44695	-1.1618	0.041234	1.3847
N6-Acetyl-L-lysine	0.40781	-1.294	0.02144	1.6688
Tartaric acid	0.28444	-1.8138	0.045249	1.3444
Glycocholic acid	0.12895	-2.9551	0.041234	1.3847
Cortisol	0.1085	-3.2043	0.0078379	2.1058
LysoPC(15:0)	0.10036	-3.3167	0.0014838	2.8286
