# Supplementary material for: Exploratory metabolomic analysis for characterizing the metabolic profile of the urinary bladder under estrogen deprivation
Source: Front Endocrinol (Lausanne). 2024 May 31;15:1384115. doi: 10.3389/fendo.2024.1384115 (PMC11176512; doi:10.3389/fendo.2024.1384115)
Supplement: Supplementary file 19 [file Table_5.xls]

## Sheet: EBAM-OVX vs sham
	z.value	posterior	local.fdr
3, 5-Tetradecadiencarnitine	11.474	0.99967	0.0003258
LysoPC(15:0)	7.9148	0.99654	0.0034551
Tetradecanoylcarnitine	-4.8018	0.99435	0.0056498
2-Hydroxybutyric acid	-4.6615	0.99289	0.0071146
N6-Acetyl-L-lysine	4.3103	0.94178	0.058217
L-Leucine	-4.0925	0.98192	0.018077
L-Valine	-4.0139	0.97946	0.020545
cis-5-Tetradecenoylcarnitine	-3.7943	0.97067	0.029333
L-Tyrosine	-3.7677	0.96938	0.030619
L-Phenylalanine	-3.6011	0.95997	0.040034
L-gamma-glutamyl-L-leucine	-3.5792	0.95854	0.041462
L-Isoleucine	-3.5445	0.95617	0.043828
Dodecanoylcarnitine	-3.5235	0.95468	0.045324
LysoPC(14:0)	-3.4541	0.94937	0.050631
Coumarin	-3.4465	0.94875	0.051246
Gamma-Glutamyltyrosine	-3.3477	0.94006	0.059942
Succinic acid	-3.2282	0.92763	0.072374

## Sheet: EBAM-OVX vs OVX+E
	z.value	posterior	local.fdr
LysoPC(15:0)	6.8598	0.9997	0.0003004
L-Tyrosine	-5.2923	0.99892	0.00108
Fumaric acid	5.1963	0.99637	0.0036337
Cortisol	5.089	0.99573	0.004267
L-Valine	-4.5969	0.99332	0.0066782
Coumarin	-4.5698	0.99285	0.0071543
2-Hydroxybutyric acid	-4.5609	0.99268	0.0073185
Gamma-Glutamyltyrosine	-4.4117	0.98936	0.010645
L-Leucine	-4.3734	0.9883	0.011702
N6-Acetyl-L-lysine	4.0786	0.98069	0.019307
L-Isoleucine	-3.9971	0.97138	0.028625
L-Malic acid	3.9541	0.97675	0.023245
Homocitrulline	3.859	0.97321	0.026785
Glycocholic acid	3.5706	0.95885	0.041151
4-Guanidinobutanoic acid	3.5415	0.95703	0.04297
Tartaric acid	3.4374	0.94983	0.050168
L-gamma-glutamyl-L-leucine	-3.412	0.90373	0.096273
4-Hydroxybutyric acid	3.3974	0.94676	0.053241
(R)-3-Hydroxybutyric acid	3.3759	0.94503	0.054974
C17-carnitine	3.2027	0.92889	0.07111
3, 5-Tetradecadiencarnitine	3.0069	0.90491	0.095093
