# Supplementary material for: Exploratory metabolomic analysis for characterizing the metabolic profile of the urinary bladder under estrogen deprivation
Source: Front Endocrinol (Lausanne). 2024 May 31;15:1384115. doi: 10.3389/fendo.2024.1384115 (PMC11176512; doi:10.3389/fendo.2024.1384115)
Supplement: Supplementary file 20 [file Table_6.xls]

## Sheet: OVX vs sham SAM
	d.value	stdev	rawp	q.value
3, 5-Tetradecadiencarnitine	3.489	0.15107	0	0
LysoPC(15:0)	2.2749	0.13945	0	0

## Sheet: OVX vs e SAM
	d.value	stdev	rawp	q.value
LysoPC(15:0)	2.3701	0.17959	0	0
Cortisol	2.0916	0.2374	0	0
Glycocholic acid	1.6083	0.27882	0	0
2-Hydroxybutyric acid	-1.4382	0.15668	0.00052632	0.010907
N6-Acetyl-L-lysine	1.3606	0.17031	0.00068421	0.010907
Tartaric acid	1.3332	0.21555	0.00078947	0.010907
Gamma-Glutamyltyrosine	-1.326	0.1462	0.00084211	0.010907
4-Guanidinobutanoic acid	1.2515	0.18592	0.0018421	0.019087
C17-carnitine	1.2484	0.21731	0.0018947	0.019087
Fumaric acid	1.2164	0.10397	0.0022632	0.019087
3, 5-Tetradecadiencarnitine	1.1973	0.2251	0.0023684	0.019087
Homocitrulline	1.19	0.15169	0.0025263	0.019087
4-Hydroxybutyric acid	1.1049	0.16396	0.0046316	0.026841
(R)-3-Hydroxybutyric acid	1.1023	0.16494	0.0047368	0.026841
N-Acetylglutamic acid	1.0476	0.22315	0.0072105	0.032687
Gluconic acid	1.0168	0.21394	0.0085263	0.035137
cis-Aconitic acid	0.97508	0.1835	0.011789	0.043709
L-Alanine	0.97129	0.30539	0.012053	0.043709
