# Supplementary material for: Exploratory metabolomic analysis for characterizing the metabolic profile of the urinary bladder under estrogen deprivation
Source: Front Endocrinol (Lausanne). 2024 May 31;15:1384115. doi: 10.3389/fendo.2024.1384115 (PMC11176512; doi:10.3389/fendo.2024.1384115)
Supplement: Supplementary file 21 [file Table_7.xlsx]

## Sheet: sham vs ovx
Name	AUC	T-tests	Log2 FC
LysoPC(15:0)	1	1.5508e-06	-2.4422
3, 5-Tetradecadiencarnitine	1	1.6596e-08	-5.5357
N6-Acetyl-L-lysine	0.98438	0.00071907	-1.1866
Tetradecanoylcarnitine	0.98438	0.00028163	0.99009
cis-5-Tetradecenoylcarnitine	0.95312	0.0019729	1.2321
Dodecanoylcarnitine	0.95312	0.0033739	0.8394
2-Hydroxybutyric acid	0.9375	0.00036698	0.92139
L-Tyrosine	0.9375	0.0020792	0.40904
L-Leucine	0.9375	0.0010981	0.36835
L-Valine	0.92188	0.0012806	0.4206
L-Phenylalanine	0.90625	0.0028924	0.26778
L-Isoleucine	0.90625	0.0032361	0.33647
Tartaric acid	0.90625	0.0059897	-0.96476
(R)-3-Hydroxybutyric acid	0.89062	0.0037448	-0.83351
Fumaric acid	0.89062	0.0033242	-0.61954
Cholic acid	0.89062	0.024977	1.1753
4-Hydroxybutyric acid	0.89062	0.003236	-0.84341
Gamma-Glutamyltyrosine	0.89062	0.0047857	0.74965
Cortisol	0.875	0.0087618	-2.2754
Deoxyadenosine	0.875	0.01518	0.56072
L-Palmitoylcarnitine	0.875	0.014057	1.4289
Succinic acid	0.875	0.0060699	0.53187
Hexanoylcarnitine	0.875	0.015787	0.53703
Coumarin	0.875	0.0039322	0.45142
4-Guanidinobutanoic acid	0.875	0.01	-1.1831
L-gamma-glutamyl-L-leucine	0.875	0.0030207	0.48103
C17-carnitine	0.875	0.011255	0.77608
L-Malic acid	0.85938	0.053135	-0.34094
L-Lysine	0.85938	0.017252	-0.43284
Xanthosine	0.85938	0.047496	-0.59864
Phosphorylcholine	0.85938	0.027336	-0.22291
LysoPC(14:0)	0.85938	0.0038733	0.40038
Lysyl-Leucine	0.85938	0.010175	0.44724
Glutathione	0.84375	0.030344	-0.73909
L-Lactic acid	0.84375	0.038219	0.18946
L-Octanoylcarnitine	0.84375	0.011856	0.93132
L-gamma-glutamyl-L-valine	0.84375	0.010401	0.55955
2-Hydroxyglutarate	0.84375	0.021711	-0.22517
Urocanic acid	0.82812	0.025945	-0.81786
L-Methionine	0.82812	0.017634	0.3406
3-Hydroxyisovaleric acid	0.82812	0.031133	0.41554
Stearoylcarnitine	0.82812	0.016781	1.3918
N-a-Acetyl-L-arginine	0.82812	0.025953	-0.31081
N-Acetyl-L-methionine	0.82812	0.016268	-0.39122
Methionyl-Phenylalanine	0.82812	0.022143	-0.79826
D-Glucose	0.8125	0.029069	0.48696
Hippuric acid	0.8125	0.018472	-1.5636
Phosphocreatine	0.8125	0.029475	-1.6083
O-decanoyl-L-carnitine	0.8125	0.043678	0.9331
D-Maltose	0.79688	0.03481	-1.1574
Gluconic acid	0.79688	0.027306	-0.94957
Butyrylcarnitine	0.79688	0.040647	0.35921
sn-1 LysoPC(18:0)	0.79688	0.075465	0.52741
(S)-Homostachydrine	0.79688	0.10372	0.68957
Citric acid	0.78125	0.080298	-0.42172
2-Hydroxycaproic acid	0.78125	0.028974	0.34667
sn-1 LysoPC(16:0)	0.78125	0.019824	0.80343
sn-2 LysoPC(16:0)	0.78125	0.046369	0.5089
Adenosine monophosphate	0.76562	0.20479	0.33531
Uracil	0.76562	0.048245	-0.63109
L-Glutamine	0.76562	0.062447	0.17121
gamma-Glutamylcysteine	0.76562	0.046708	-0.86353
L-gamma-glutamyl-L-isoleucine	0.76562	0.052166	-0.28091
Phenylalanyl-Glutamate	0.76562	0.10342	0.37646
Serinyl-Phenylalanine	0.76562	0.12821	0.37267
Citrulline	0.75	0.14917	0.30328
Oxidized glutathione	0.75	0.072297	0.20869
Leucyl-Arginine	0.75	0.11425	0.22429
Cytidine	0.73438	0.175	-0.29826
Uridine 5'-monophosphate	0.73438	0.097147	0.40747
L-Tryptophan	0.73438	0.13012	0.16147
Guanosine monophosphate	0.73438	0.10985	0.29892
Tiglylcarnitine	0.73438	0.18554	-0.33832
Serylvaline	0.73438	0.2221	-0.40917
4-Pyridoxic acid	0.71875	0.12335	-0.9144
Pantothenic acid	0.71875	0.24196	-0.17424
2-Ethylhydracrylic acid	0.71875	0.19474	0.26377
Fructose 1,6-bisphosphate	0.71875	0.15337	-0.42219
2-Methylguanosine	0.71875	0.15821	-0.26153
LysoPC(20:4(5Z,8Z,11Z,14Z))	0.71875	0.093561	0.53568
LysoPE(20:4)	0.71875	0.051703	0.9668
L-Glutamic acid	0.70312	0.19997	0.21539
L-Proline	0.70312	0.27207	0.1258
Thymidine	0.70312	0.13792	-0.82847
Xanthine	0.70312	0.41604	-0.15518
Indolelactic acid	0.70312	0.11536	-1.4301
Homocitrulline	0.70312	0.16147	-0.37005
3-Phosphoglyceric acid	0.70312	0.10529	-0.39444
N-Acetylaspartylglutamic acid	0.70312	0.18388	-0.4368
Cytidine monophosphate	0.6875	0.13253	0.19679
Oxoglutaric acid	0.6875	0.37144	0.09362
thymine	0.6875	0.17648	-0.54898
Indoxyl sulfate	0.6875	0.14742	-0.89594
Pseudouridine	0.6875	0.10686	-2.7589
Oxypurinol	0.6875	0.4284	-0.16648
sn-1 LysoPC(18:2)	0.6875	0.19429	0.47176
LysoPE(16:0)	0.6875	0.16427	0.2588
Hydroxyvalerylcarnitine	0.6875	0.19018	0.22209
3-Hydroxyisovalerylcarnitine	0.6875	0.24415	0.18954
sn-2 LysoPC(18:0)	0.6875	0.22987	0.32141
L-Carnitine	0.67188	0.34598	0.21245
Epinephrine	0.67188	0.26253	-0.20221
Phosphoenolpyruvic acid	0.67188	0.173	-0.7345
Allantoin	0.67188	0.15533	-0.64298
Adenylsuccinic acid	0.67188	0.18893	-0.22152
Creatinine	0.67188	0.14828	-0.66811
Hydroxyphenyllactic acid	0.67188	0.12249	0.32904
5'-Methylthioadenosine	0.67188	0.28628	0.19653
L-Acetopine	0.67188	0.45275	0.12568
Guanine	0.65625	0.51375	-0.099456
Guanosine	0.65625	0.46764	-0.13281
Isovalerylcarnitine	0.65625	0.55891	0.10908
N-Acetylglutamic acid	0.65625	0.16384	-0.78091
Gamma-Glutamyl Glutamine	0.65625	0.53802	0.13439
Pivaloylcarnitine	0.65625	0.60953	0.12637
Phenol sulphate	0.65625	0.18454	-0.65641
Adenine	0.64062	0.29108	0.098754
cis-Aconitic acid	0.64062	0.19081	-0.63315
L-Aspartic acid	0.64062	0.93445	-0.036669
Taurine	0.64062	0.36556	0.076254
(S)-2-Azetidinecarboxylic acid	0.64062	0.28223	0.1535
Glycocholic acid	0.625	0.69038	-0.80524
L-Threonine	0.625	0.39458	-0.11172
L-Arginine	0.625	0.46166	0.094001
5-Hydroxyhexanoic acid	0.625	0.76876	-0.050221
Isobutyryl-L-carnitine	0.625	0.65807	0.071019
D-Glyceraldehyde 3-phosphate	0.625	0.21628	0.30349
NADH	0.625	0.31983	-0.24814
Acetaminophen	0.625	0.65827	0.14413
1-Methylguanine	0.625	0.27157	-0.76431
1-Methyladenosine	0.625	0.14551	-0.98638
Hypoxanthine	0.60938	0.68748	-0.045828
Inosinic acid	0.60938	0.4739	0.28165
Pyruvic acid	0.60938	0.35797	0.19554
Glycyl-L-leucine	0.60938	0.43308	-0.055508
1-Methylguanosine	0.60938	0.21242	-0.57489
2-Hydroxy-2-methylbutyric acid	0.60938	0.62776	0.0094716
p-Cresol sulfate	0.60938	0.62726	-0.40451
Dihydrouracil	0.59375	0.23953	0.20283
L-Acetylcarnitine	0.59375	0.47487	0.06852
Glucose 6-phosphate	0.59375	0.64975	-0.087996
Adenosine 3'-monophosphate	0.59375	0.49573	0.2735
Alpha-ketoisovaleric acid	0.57812	0.90005	-0.0089183
Adenosine	0.57812	0.68211	0.0651
Glycerol 3-phosphate	0.57812	0.79782	-0.10415
NAD	0.57812	0.61952	0.04794
trans-2-Tetradecenoylcarnitine	0.57812	0.57168	0.12202
O-Adipoylcarnitine	0.57812	0.4817	-0.51249
Pyroglutamine	0.57812	0.39353	0.2189
Serylleucine	0.57812	0.43448	-0.1066
Glycerophosphocholine	0.5625	0.8665	-0.0033569
L-Alanine	0.5625	0.15026	-0.39532
Inosine	0.5625	0.73863	-0.035441
Pyroglutamic acid	0.5625	0.85607	-0.015054
5-Hydroxy-L-tryptophan	0.5625	0.57294	-0.32343
N-Acetyl-L-aspartic acid	0.5625	0.59862	-0.072012
Acetylcholine	0.5625	0.77222	0.077008
ADP	0.5625	0.89921	0.025181
D-Ribose 5-phosphate	0.5625	0.63173	-0.13147
Isoleucyl-Alanine	0.5625	0.4095	-0.67973
Leucyl-Serine	0.5625	0.62212	0.10996
Cytosine	0.54688	0.6776	-0.13348
D-Sedoheptulose 7-phosphate	0.54688	0.77797	0.045437
D-Erythrose 4-phosphate	0.54688	0.69519	-0.15587
Threoninyl-Leucine	0.54688	0.9486	0.11976
Creatine	0.53125	0.93891	0.0077917
Pipecolic acid	0.53125	0.55088	0.11487
Choline	0.53125	0.62099	0.045847
Sarcosine	0.53125	0.97831	0.00094176
Uric acid	0.53125	0.90139	-0.045271
Uridine	0.53125	0.86795	-0.1149
4-Hydroxyproline	0.53125	0.98732	-0.014092
Hypotaurine	0.53125	0.93632	-0.076653
Niacinamide	0.53125	0.49863	0.050524
Symmetric dimethylarginine	0.53125	0.91414	-0.05434
Phenylalanyl-Serine	0.53125	0.88916	-0.2072
Tryptophyl-Leucine	0.53125	0.99823	-0.17098
Fructose 6-phosphate	0.51562	0.92735	0.10887
Propionylcarnitine	0.51562	0.72617	-0.023078
Tridecanoic acid	0.51562	0.94066	0.020488
6-Phosphogluconic acid	0.51562	0.8149	0.061661
Diethanolamine	0.51562	0.99945	-0.0038633
Hydroxyhexanoycarnitine	0.51562	0.97079	-0.0069068
2-Hydroxypyridine	0.51562	0.514	-0.083308
L-Threonic Acid	0.51562	0.90769	-0.022597
sn-2 LysoPC(18:2)	0.51562	0.90673	-0.0020431
L-Kynurenine	0.5	0.98483	-0.11243
Phenylacetylglycine	0.5	0.80812	-0.24945
6-Phosphonoglucono-D-lactone	0.5	0.98146	-0.017063
Proline betaine	0.5	0.98334	-0.10676

## Sheet: OVX vs OVX+E
Name	AUC	T-tests	Log2 FC
LysoPC(15:0)	1	7.8097e-06	-3.4176
Fumaric acid	0.98438	0.00013549	-0.78238
2-Hydroxybutyric acid	0.96875	0.00044437	0.96098
Cortisol	0.96875	0.00016501	-3.397
L-Tyrosine	0.96875	0.00011375	0.34377
Tartaric acid	0.96875	0.0040037	-1.9588
N6-Acetyl-L-lysine	0.95312	0.0011284	-1.4574
Coumarin	0.95312	0.00043686	0.42456
Homocitrulline	0.9375	0.0017366	-0.91337
L-Leucine	0.9375	0.00063656	0.34801
L-Valine	0.9375	0.00041492	0.31661
Glycocholic acid	0.92188	0.0030727	-3.0536
L-Malic acid	0.92188	0.0014402	-0.52624
Tetradecanoylcarnitine	0.92188	0.0050167	0.50778
Gamma-Glutamyltyrosine	0.92188	0.00059138	0.8073
L-Isoleucine	0.90625	0.0013236	0.34903
6-Phosphonoglucono-D-lactone	0.90625	0.0053643	0.40373
L-gamma-glutamyl-L-leucine	0.90625	0.0042115	0.3669
C17-carnitine	0.90625	0.0063863	-1.6372
D-Glucose	0.89062	0.008358	0.63757
Pantothenic acid	0.89062	0.016434	-0.60116
L-Methionine	0.89062	0.0072288	0.26941
4-Guanidinobutanoic acid	0.89062	0.0032553	-1.3187
(R)-3-Hydroxybutyric acid	0.875	0.0045249	-0.94794
4-Hydroxybutyric acid	0.875	0.004335	-0.94603
L-Phenylalanine	0.85938	0.0062633	0.1222
Taurine	0.85938	0.019724	0.086682
Gluconic acid	0.85938	0.019643	-1.3232
L-gamma-glutamyl-L-valine	0.85938	0.0086001	0.50271
Serylvaline	0.85938	0.1399	-0.76102
Butyrylcarnitine	0.84375	0.020567	0.17605
3, 5-Tetradecadiencarnitine	0.84375	0.0094214	-1.3021
Epinephrine	0.82812	0.020429	-0.68991
Tridecanoic acid	0.82812	0.020439	-0.69531
N-Acetylglutamic acid	0.82812	0.019225	-1.5418
N-Acetyl-L-methionine	0.82812	0.065977	-0.80507
Pyroglutamine	0.82812	0.04039	-1.1226
cis-Aconitic acid	0.8125	0.014668	-1.0814
L-Lysine	0.8125	0.019906	-0.59353
Acetylcholine	0.8125	0.034652	0.43094
Lysyl-Leucine	0.8125	0.03323	0.35385
L-Carnitine	0.78125	0.1795	0.14291
Citric acid	0.78125	0.015608	-0.76146
Deoxyadenosine	0.78125	0.034289	0.3888
Glycerol 3-phosphate	0.78125	0.13184	0.11778
L-Kynurenine	0.78125	0.054048	-1.1556
Proline betaine	0.78125	0.10321	-0.77513
Phenylalanyl-Glutamate	0.78125	0.052614	0.38665
L-Lactic acid	0.76562	0.075287	0.035874
3-Hydroxyisovaleric acid	0.76562	0.029349	0.27115
Glycyl-L-leucine	0.76562	0.093607	0.051637
Phosphocreatine	0.76562	0.083423	-0.75623
Adenosine 3'-monophosphate	0.76562	0.10892	0.62014
Urocanic acid	0.75	0.073322	-0.77429
Hippuric acid	0.75	0.091586	-1.525
N-Acetylaspartylglutamic acid	0.75	0.091072	-0.62795
2-Hydroxycaproic acid	0.75	0.086242	0.18456
Acetaminophen	0.75	0.1348	0.32482
Gamma-Glutamyl Glutamine	0.75	0.24686	0.097076
Hydroxyhexanoycarnitine	0.75	0.3027	-0.40217
sn-2 LysoPC(18:2)	0.75	0.060314	-0.48926
L-Alanine	0.73438	0.059221	-0.9231
Succinic acid	0.73438	0.40254	-0.019973
Fructose 1,6-bisphosphate	0.73438	0.16501	-0.85491
Methionyl-Phenylalanine	0.73438	0.12835	-0.7717
L-Threonic Acid	0.73438	0.107	0.30863
Pyroglutamic acid	0.71875	0.22334	-0.32072
Adenylsuccinic acid	0.71875	0.087414	-0.75684
Cytosine	0.71875	0.18376	0.011843
Isovalerylcarnitine	0.71875	0.13023	0.37253
Symmetric dimethylarginine	0.71875	0.17508	-0.46658
L-gamma-glutamyl-L-isoleucine	0.71875	0.20865	-0.31292
Leucyl-Arginine	0.71875	0.10461	0.11048
Glycerophosphocholine	0.70312	0.19444	-0.28967
L-Acetylcarnitine	0.70312	0.25837	-0.044974
Dodecanoylcarnitine	0.70312	0.075361	0.32842
Serinyl-Phenylalanine	0.70312	0.26678	0.12803
Adenine	0.6875	0.23556	-0.030292
L-Threonine	0.6875	0.19758	-0.42938
Sarcosine	0.6875	0.28635	-0.041225
2-Ethylhydracrylic acid	0.6875	0.20044	0.12584
L-Glutamine	0.6875	0.34258	-0.061325
Isobutyryl-L-carnitine	0.6875	0.26543	0.3221
Pseudouridine	0.6875	0.15777	-2.3894
Niacinamide	0.6875	0.22207	-0.029461
Oxidized glutathione	0.6875	0.27304	-0.034873
Leucyl-Serine	0.6875	0.26468	0.18036
Hexanoylcarnitine	0.67188	0.16947	0.12813
Hypotaurine	0.67188	0.22934	0.072444
Phosphorylcholine	0.67188	0.42916	-0.22265
Phenylalanyl-Serine	0.67188	0.29357	-0.46519
Phenol sulphate	0.67188	0.1256	-0.65723
Adenosine monophosphate	0.65625	0.45668	0.025965
Creatine	0.65625	0.45761	-0.074787
Choline	0.65625	0.24075	-0.025652
Hypoxanthine	0.65625	0.28128	-0.012748
Uridine	0.65625	0.57966	0.074473
Xanthosine	0.65625	0.32269	-0.54657
4-Hydroxyproline	0.65625	0.26838	-0.041011
Phenylacetylglycine	0.65625	0.36317	-0.71337
N-a-Acetyl-L-arginine	0.65625	0.27172	-0.44888
sn-1 LysoPC(18:2)	0.65625	0.2806	-0.7214
trans-2-Tetradecenoylcarnitine	0.65625	0.24319	0.14658
Alpha-ketoisovaleric acid	0.64062	0.35067	0.073136
Inosine	0.64062	0.23545	-0.010807
L-Palmitoylcarnitine	0.64062	0.3123	0.45969
Uracil	0.64062	0.47195	-0.45808
N-Acetyl-L-aspartic acid	0.64062	0.30058	-0.30172
gamma-Glutamylcysteine	0.64062	0.28004	-0.27181
ADP	0.64062	0.84902	-0.12266
LysoPC(14:0)	0.64062	0.38965	-0.012387
3-Hydroxyisovalerylcarnitine	0.64062	0.27954	0.0068864
Uridine 5'-monophosphate	0.625	0.27701	0.11993
5'-Methylthioadenosine	0.625	0.27412	-0.30815
1-Methylguanine	0.625	0.61215	-0.49682
Hydroxyvalerylcarnitine	0.625	0.56423	-0.2705
L-Proline	0.60938	0.20929	-0.29032
Indoxyl sulfate	0.60938	0.41839	-0.7133
Hydroxyphenyllactic acid	0.60938	0.37829	0.017835
Oxypurinol	0.60938	0.86248	-0.21341
Stearoylcarnitine	0.60938	0.54673	0.14431
Guanosine monophosphate	0.60938	0.36372	0.0060432
Glucose 6-phosphate	0.60938	0.94878	0.022769
p-Cresol sulfate	0.60938	0.73944	-0.51587
Pivaloylcarnitine	0.60938	0.47224	0.027552
O-Adipoylcarnitine	0.60938	0.79699	-0.59034
Adenosine	0.59375	0.54075	-0.043029
Pipecolic acid	0.59375	0.48708	-0.20414
Thymidine	0.59375	0.62926	-0.26662
L-Arginine	0.59375	0.7342	-0.11317
Creatinine	0.59375	0.73541	-0.36746
2-Hydroxy-2-methylbutyric acid	0.59375	0.41857	0.19622
Diethanolamine	0.59375	0.49174	-0.077222
Isoleucyl-Alanine	0.59375	0.73203	-0.058873
2-Hydroxyglutarate	0.59375	0.39524	-0.36778
Glutathione	0.57812	0.43749	-0.35886
Xanthine	0.57812	0.86072	-0.20787
Cholic acid	0.57812	0.40208	-0.80308
Propionylcarnitine	0.57812	0.94409	-0.083943
1-Methyladenosine	0.57812	0.73091	-0.33422
LysoPC(20:4(5Z,8Z,11Z,14Z))	0.57812	0.48785	-0.45352
Cytidine monophosphate	0.5625	0.55414	-0.060854
5-Hydroxyhexanoic acid	0.5625	0.54607	0.12981
L-Octanoylcarnitine	0.5625	0.44115	0.1868
NAD	0.5625	0.40479	-0.047138
Citrulline	0.5625	0.81596	-0.082138
cis-5-Tetradecenoylcarnitine	0.5625	0.47767	0.17328
Tiglylcarnitine	0.5625	0.56125	-0.028316
LysoPE(16:0)	0.5625	0.47313	-0.33371
LysoPE(20:4)	0.5625	0.53669	0.056796
Threoninyl-Leucine	0.5625	0.97293	-0.06004
Tryptophyl-Leucine	0.5625	0.60412	-0.42024
Serylleucine	0.5625	0.86865	-0.073212
Cytidine	0.54688	0.78286	-0.20312
Guanosine	0.54688	0.7814	-0.10175
Uric acid	0.54688	0.60377	-0.088678
Indolelactic acid	0.54688	0.92818	0.021416
3-Phosphoglyceric acid	0.54688	0.79959	-0.099662
D-Glyceraldehyde 3-phosphate	0.54688	0.6618	-0.046074
D-Erythrose 4-phosphate	0.54688	0.79469	-0.020975
2-Hydroxypyridine	0.54688	0.88418	-0.16139
(S)-2-Azetidinecarboxylic acid	0.54688	0.94176	-0.18309
sn-2 LysoPC(16:0)	0.54688	0.96258	-0.16794
4-Pyridoxic acid	0.53125	0.63408	-0.21363
Dihydrouracil	0.53125	0.34387	0.023739
D-Maltose	0.53125	0.50559	-0.31097
Inosinic acid	0.53125	0.92625	-0.13203
Oxoglutaric acid	0.53125	0.64493	-0.36692
Allantoin	0.53125	0.70215	-0.31707
5-Hydroxy-L-tryptophan	0.53125	0.68605	-0.36598
L-Tryptophan	0.53125	0.83454	-0.17024
D-Sedoheptulose 7-phosphate	0.53125	0.40867	0.24683
6-Phosphogluconic acid	0.53125	0.89087	-0.069047
NADH	0.53125	0.80464	-0.35393
O-decanoyl-L-carnitine	0.53125	0.56017	0.2538
Guanine	0.51562	0.70999	-0.090829
L-Glutamic acid	0.51562	0.92639	-0.14266
Pyruvic acid	0.51562	0.8157	-0.15126
thymine	0.51562	0.67125	-0.48385
Phosphoenolpyruvic acid	0.51562	0.77679	-0.073639
D-Ribose 5-phosphate	0.51562	0.61822	-0.078107
1-Methylguanosine	0.51562	0.93439	-0.18006
2-Methylguanosine	0.51562	0.90925	-0.14961
sn-1 LysoPC(16:0)	0.51562	0.79624	-0.40087
sn-1 LysoPC(18:0)	0.51562	0.94322	-0.26252
sn-2 LysoPC(18:0)	0.51562	0.84204	-0.22061
Fructose 6-phosphate	0.5	0.86466	0.014453
L-Aspartic acid	0.5	0.65452	-0.097566
(S)-Homostachydrine	0.5	0.7698	-0.25746
L-Acetopine	0.5	0.73912	-0.19454
